# Supplementary material for: Accurate construction of monolayer, bilayer, sandwich bilayer, four-layer, multi-layer and chiral bilayer 2D pillararene-type supramolecular networks
Source: Royal Society of Chemistry journal article supplement (doi:10.1039/d4sc03022b), 2024-01-01
Supplement: d4sc03022b1.pdf [file d4sc03022b1.pdf]

## **Supporting Information**

**Accurate Construction of Monolayer, Bilayer, Sandwich Bilayer,  
Four-layer, Multi-layer and Chiral Bilayer 2D Pillararene-Type  
Supramolecular Networks**

## Table of contents

|                                                                    |    |
|--------------------------------------------------------------------|----|
| Experimental Methods .....                                         | 3  |
| Characterization data of metal-organic coordination polymers ..... | 8  |
| Crystal data and structure refinement .....                        | 65 |
| <sup>1</sup> H-NMR and <sup>13</sup> C-NMR spectrum .....          | 70 |

## Experimental Methods

All reagents were obtained from commercial suppliers and used without further purification unless otherwise noted.  $^1\text{H}$ ,  $^{13}\text{C}$  NMR, 2D NOESY and COSY spectra were recorded on 400 MHz, 500 MHz and 600 MHz spectrometers in the indicated solvents at room temperature (298 K). UV-Vis absorption spectrum was performed on a UV-2600i UV-Vis spectrophotometer. X-ray diffraction (XRD) measurements were carried out using a PANalytical X'Pert PRO powder diffractometer. Fluorescence spectra were recorded on an RF-6000 (Excitation slit = 5 nm, Emission slit = 5 nm). Liquid phase circular dichroism (CD) spectra were recorded on a Chirascan Circular Dichroism Chiroptical spectrometer in chloroform and solid phase circular dichroism (CD) spectra were recorded on a JASCO J-810 Circular Dichroism Chiroptical spectrometer. Transmission electron micrographs (TEM) were recorded on FEI Tecnai G2 F20S-TWINTMP. Atomic Force Microscopy (AFM) measurement was performed in tapping mode on a Shimadzu spm9700. The thickness difference in the acquired AFM images was analyzed by drawing line sections that are perpendicular to the scanning direction in the AFM tapping mode. The resolution of racemic-P6 was performed by Daicel Chiral Technologies (China) Co., Ltd. on chiral HPLC equipment Shimadzu LC-20AT (CP-HPLC-06) with a CHIRALPAK IC(IC00CD-NA012) preparation column using methanol/dichloromethane/diethanol amine (MeOH/DCM/DEA) = 40/60/0.1(V/V/V) as the mobile phase.

The X-ray crystallographic data of **P5PhPy2**, **P5PhPy4**, **P6PhPy4**, **P5PhPy2Cu-1**, **P5PhPy2Cu-3** was obtained on Bruker D8 VENTURE diffractometer with a CCD diffractometer using graphite-monochromated  $\text{MoK}\alpha$  radiation ( $\lambda = 0.71073 \text{ \AA}$ ) at 300 K for **P5PhPy2**, 292 K for **P5PhPy4** and **P5PhPy2Cu-1**, 296 K for **P6PhPy4** and 150 K for **P5PhPy2Cu-3**. The absolute configuration of **P5PhPy2Cu-4** was determined by single crystal X-ray diffraction analysis on Rigaku XtaLAB PRO MM003-DS dual system with a Cu micro-focus source ( $\lambda = 1.5418 \text{ \AA}$ ) at 173.00 K. The X-ray diffraction data of **bl-2D-P5MOCN**, **fl-2D-P6MOCN**, **R-bl-2D-P6MOCN**, **S-bl-2D-P6MOCN** was collected on a Bruker D8 VENTURE diffractometer outfitted with a PHOTON-100 CMOS detector using Turbo X-ray Source (TXS) rotating anode  $\text{MoK}\alpha$  radiation ( $\lambda = 0.71073 \text{ \AA}$ ) at 193 K by chilled nitrogen flow controlled by a KRYOFLEX II low-temperature attachment. The X-ray diffraction data of **P5PhPy2Cu-2**, **P5PhPy2Co-1**, **ml-2D-P5MOCN**, **sbl-2D-P6MOCN-2** and **mtl-2D-P6MOCN** was collected on a Bruker D8 VENTURE diffractometer equipped with an Excillum METALJET Ga- $\text{K}\alpha$  radiation ( $\lambda = 1.34139 \text{ \AA}$ ) and a PHOTON II CMOS detector with a Helios Multi-layer Optic monochromator at 193 K using an Oxford Cryosystems Cryostream 800 cryostat. The X-ray diffraction data of **bl-2D-P6MOCN**, **sbl-2D-P6MOCN**,  $\text{I}_2\text{C}$  **mtl-2D-P6MOCN** was collected on a Bruker D8 VENTURE dual-wavelength Mo/Cu diffractometer equipped with INCOATEC Ims DIAMOND  $\text{CuK}\alpha$  radiation ( $\lambda = 1.54178 \text{ \AA}$ ) and a PHOTON II CMOS detector with a Helios Multi-layer Optic monochromator at 193 K temperature.

using an Oxford Cryosystems Cryostream 800 cryostat. Deposition numbers 2244320 (for **P5PhPy4**), 2244321 (for **P5PhPy2**), 2244322 (for **P5PhPy2Cu-1**), 2244323 (for **P5PhPy2Cu-2**), 2244324 (for **P5PhPy2Cu-3**), 2244325 (for **P5PhPy2Cu-5**), 2244326 (for **P5PhPy2Co-1**), 2244327 (for **ml-2D-P5MOCN**), 2244328 (for **bl-2D-P5MOCN**), 2326170 (for **P6PhPy4**), 2326171 (for **bl-2D-P6MOCN**), 2342430 (for **sbl-2D-P6MOCN**), 2326172 (for **sbl-2D-P6MOCN**), 2326174 (for **fl-2D-P6MOCN**), 2326175 (for **mtl-2D-P6MOCN**), 2326165 (for **I<sub>2</sub>@mtl-2D-P6MOCN**), 2326166 (for **R-bl-2D-P6MOCN**), and 2326167 (for **S-bl-2D-P6MOCN**) contain the supplementary crystallographic data for this paper. These data are provided free of charge by the joint Cambridge Crystallographic Data Centre via [www.ccdc.cam.ac.uk/data\\_request/cif](http://www.ccdc.cam.ac.uk/data_request/cif). All data integration and empirical absorption correction were carried out using the SAINT program. Using Olex2 and SHELXTL, the structure was solved by direct method and refined matrix least-squares on F<sup>2</sup> with anisotropic displacement. Non-hydrogen atoms were refined anisotropically, hydrogen atoms were constrained to ideal geometries.

Compounds **1**, **2**, **4** and **P5PhPy2** were prepared according to the reported method.<sup>1-5</sup>

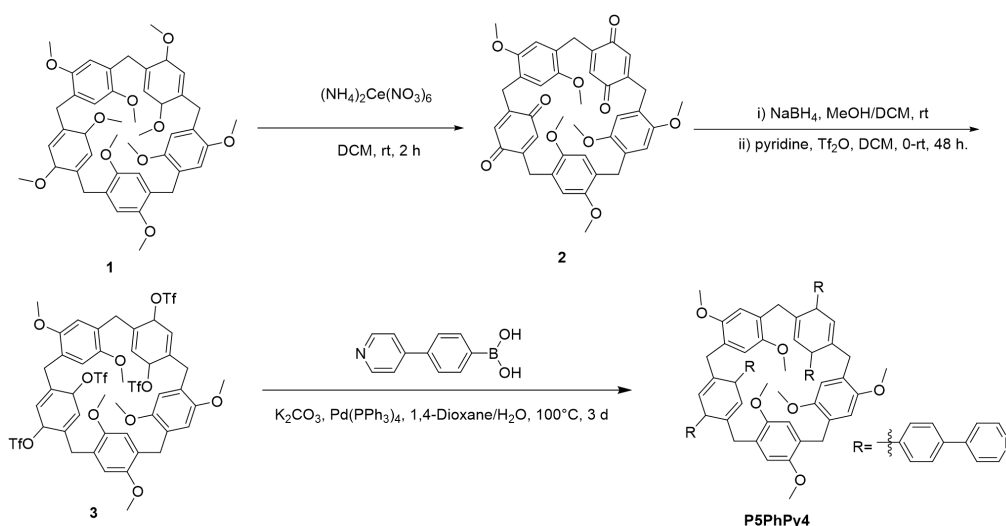

Compound **3**: NaBH<sub>4</sub> (402 mg, 10.6 mmol) was added to a solution of compound **2** (1.63 g, 2.36 mmol) in CH<sub>2</sub>Cl<sub>2</sub>/MeOH (5:1, 60 mL) at room temperature. The mixture was stirred until it turned colourless at room temperature, washed with aqueous HCl solution (1.0 M), and concentrated to give white solid, then added white solid and pyridine (1.2 mL, 14.16 mmol) in CH<sub>2</sub>Cl<sub>2</sub> (90 mL) was added triflic anhydride (1.7 mL, 9.9 mmol) at 0 °C, which resulted in a mixture that was stirred at room temperature for 2 d, washed with aqueous HCl solution (1.0 M), and concentrated. The residue was purified by column chromatography (petroleum ether/dichloromethane = 4:1, v/v) to afford compound **3** (1.5 g, 51%) as a white solid. M.p. > 82 °C (decomp). <sup>1</sup>H NMR (400 MHz, CDCl<sub>3</sub>) δ 7.33 (s, 2H), 7.30 (s, 2H), 6.84 (s, 2H), 6.74 (d, *J* = 3.7 Hz, 4H), 3.88 (s, 8H), 3.84 (s, 2H), 3.76 (s, 6H), 3.70 (s, 6H), 3.67 (s, 6H). <sup>13</sup>C NMR (101 MHz, CDCl<sub>3</sub>) δ 150.58, 150.52, 150.47, 146.23, 146.18,



133.96, 133.56, 129.44, 125.62, 124.60, 124.54, 124.29, 120.11, 120.09, 116.92, 113.97, 113.50, 113.19, 55.73, 55.16, 55.03, 30.68, 30.37, 29.37.  $[M+H]^+$  calcd for  $C_{45}H_{38}N_4F_{12}O_{10}S_4$ , 1223.0822; found, 1223.0859.

Compound **P5PhPy4**: A mixture of compound **3** (1 g, 0.81 mmol),  $K_2CO_3$  (338 mg, 2.4 mmol),  $Pd(PPh_3)_4$  (217 mg), and 4-(4-pyridyl)phenylboric acid (1.3 g, 6.52 mmol) in the mixed solution of 1,4-Dioxane/water (3:1, 80 mL) was heated to 100 °C under nitrogen for 3 d. After falling to room temperature, 1,4-dioxane and water were removed by rotary evaporation. Water (160 mL) was added to the reaction mixture after it was cooled down to room temperature. The resulting mixture was filtered to afford a solid which was purified by column (dichloromethane/methanol = 50:1, v/v) to obtain white solid compound **P5PhPy4** (490 mg, 48%). M.p. > 212 °C (decomp).  $^1H$  NMR (400 MHz,  $CDCl_3$ )  $\delta$  8.66 (dd,  $J = 9.2$  Hz, 5.6 Hz, 8H), 7.41 (dt,  $J = 18.4$  Hz, 6.8 Hz, 16H), 7.17 (s, 2H), 7.11 (t,  $J = 8.4$  Hz, 8H), 6.89 (s, 2H), 6.76 (s, 2H), 5.98 (s, 2H), 5.93 (s, 2H), 3.90-3.99 (m, 6H), 3.67-3.80 (m, 4H), 3.49 (s, 6H), 3.33 (s, 6H) 3.16 (s, 6H).  $^{13}C$  NMR (101 MHz,  $CDCl_3$ )  $\delta$  151.01, 150.87, 150.65, 150.31, 147.85, 147.79, 143.00, 142.53, 140.32, 140.29, 136.87, 136.67, 136.26, 136.19, 132.47, 131.61, 130.04, 130.01, 128.59, 128.46, 128.17, 126.59, 126.38, 121.34, 114.86, 114.03, 113.56, 56.16, 55.51, 55.37, 33.73, 33.48.  $[M+H]^+$  calcd for  $C_{85}H_{70}N_4O_6$ , 1243.5368; found, 1243.5374.

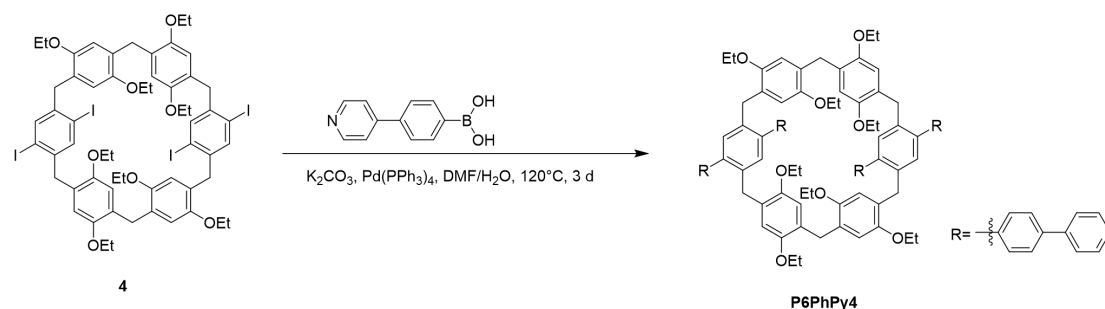

Compound **P6PhPy4**: A mixture of compound **4** (1 g, 0.72 mmol),  $K_2CO_3$  (178.2 mg, 1.3 mmol),  $Pd(PPh_3)_4$  (190 mg), and 4-(4-pyridyl)phenylboric acid (712 mg, 3.6 mmol) in the mixed solution of DMF/water (3:1, 12 mL) was heated to 120 °C under nitrogen for 3 d. After falling to room temperature, DMF and water were removed by rotary evaporation. Water (160 mL) was added to the reaction mixture after it was cooled down to room temperature. The resulting mixture was filtered to afford a solid which was purified by column (dichloromethane/methanol = 50:1, v/v) to obtain white solid compound **P6PhPy4** (400 mg, 40%). M.p. > 261 °C (decomp).  $^1H$  NMR (600 MHz,  $DMF-d_7$ )  $\delta$  8.73 – 8.67 (m, 8H), 7.63 – 7.57 (m, 16H), 7.24 (d,  $J = 8.2$  Hz, 8H), 7.14 (s, 4H), 6.76 (s, 4H), 6.24 (s, 4H), 4.05 (d,  $J = 15.1$  Hz, 4H), 3.88 (d,  $J = 15.2$  Hz, 4H), 3.80 (dq,  $J = 9.1, 7.0$  Hz, 4H), 3.73 – 3.67 (m, 8H), 3.64 – 3.54 (m, 8H), 1.14 (dt,  $J = 18.7, 7.0$  Hz, 24H).  $^{13}C$  NMR (126 MHz,  $CD_2Cl_2$ )  $\delta$  151.52, 151.25, 151.21, 148.62, 143.74, 141.39, 137.49, 136.98, 132.56, 130.84, 129.45, 128.55, 127.25, 122.29, 116.39, 115.37, 65.01, 64.69, 34.99, 15.90, 15.86.  $^1H$  NMR (500 MHz, Methylene Chloride- $d_2$ )  $\delta$  8.61 (s, 8H), 7.33 (s, 16H), 7.13 (s, 8H), 7.02 (s, 4H),

6.74 (s, 4H), 6.09 (s, 4H), 3.96 (d,  $J = 14.8$  Hz, 4H), 3.79 (t,  $J = 12.7$  Hz, 8H), 3.66 (d,  $J = 14.5$  Hz, 8H), 3.57 – 3.46 (m, 8H), 1.20 – 1.09 (m, 24H).

**P5PhPy2:** **P5PhPy2** (5 mg, 0.005 mmol), and 500  $\mu$ L DMF were added in a 4 mL vial. Slow evaporation of the solvent in the air over 2 days at room temperature, and then a single-crystal product suitable for electron diffraction (clear crystal) was obtained.

**P5PhPy2Cu-1:** **P5PhPy2** (5.0 mg, 0.005 mmol),  $\text{Cu}(\text{AC})_2$  (2.0 mg, 0.01 mmol) and 500  $\mu$ L DMF were added in a 4 mL vial. Slow evaporation of the solvent in the air over about 4 days at room temperature, and then a single-crystal product suitable for x-ray single-crystal diffraction analysis (green crystal) was obtained.

**P5PhPy2Cu-2:** **P5PhPy2** (5.0 mg, 0.005 mmol),  $\text{Cu}(\text{AC})_2$  (2.0 mg, 0.01 mmol), 500  $\mu$ L DMF and 50  $\mu$ L  $\text{CH}_3\text{COOH}$  were added to a 4 mL vial. Over about 4 days at room temperature under airtight conditions, and then a single-crystal product suitable for x-ray single-crystal diffraction analysis (green crystal) was obtained.

**P5PhPy2Cu-3 and P5PhPy2Cu-4:** **P5PhPy2** (5.0 mg, 0.005 mmol),  $\text{Cu}(\text{NO}_3)_2 \cdot 3\text{H}_2\text{O}$  (2.4 mg, 0.01 mmol), 1.0 mL DMF and 100  $\mu$ L  $\text{CH}_3\text{COOH}$  were added a 4 mL vial. The mixture was heated at 80  $^\circ\text{C}$  for 10 days under airtight conditions and then cooled to room temperature, two types of single-crystal products suitable for x-ray single-crystal diffraction analysis (blue and green crystal) were obtained.

**P5PhPy2Co-1:** **P5PhPy2** (5.0 mg, 0.005 mmol),  $\text{Co}(\text{NO}_3)_2 \cdot 6\text{H}_2\text{O}$  (3.0 mg, 0.01 mmol), 500  $\mu$ L DMF and 50  $\mu$ L  $\text{CH}_3\text{COOH}$  were added a 4 mL vial. The mixture was heated at 80  $^\circ\text{C}$  for 10 days under airtight conditions and then cooled to room temperature, a single-crystal product suitable for x-ray single-crystal diffraction analysis (pink crystal) was obtained.

**P5PhPy4:** **P5PhPy4** (3.3 mg, 0.0025 mmol), 500  $\mu$ L  $\text{CH}_2\text{Cl}_2$  and 250  $\mu$ L  $\text{C}_2\text{H}_5\text{OH}$  was added to a 4 mL vial. Slow evaporation of the solvent in the air over about 2 days at room temperature, then a single-crystal product suitable for x-ray single-crystal diffraction analysis (colourless crystal) was obtained.

**m1-2D-P5MOCN:** **P5PhPy4** (3.3 mg, 0.0025 mmol), 1.0 mL DMF, 100  $\mu$ L  $\text{H}_2\text{O}$ ,  $\text{Co}(\text{NO}_3)_2 \cdot 6\text{H}_2\text{O}$  (3 mg, 0.01 mmol), and 100  $\mu$ L  $\text{CH}_3\text{COOH}$  vial was added a 4 mL vial. The mixture was heated at 80  $^\circ\text{C}$  for 2 days under airtight conditions, and then a single-crystal product suitable for electron diffraction (pink crystal) was obtained.

**bl-2D-P5MOCN:** **P5PhPy4** (3.3 mg, 0.0025 mmol), 1.0 mL DMF,  $\text{Co}(\text{NO}_3)_2 \cdot 6\text{H}_2\text{O}$  (3 mg, 0.01 mmol) and 100  $\mu$ L  $\text{CH}_3\text{COOH}$  were added to a 4 mL vial. The mixture was stood for 4 weeks at room temperature, and then a single-crystal product suitable for electron diffraction (pink crystal) was obtained.

**P6PhPy4:** **P6PhPy4** (3.0 mg, 0.0019 mmol), 500  $\mu\text{L}$   $\text{CH}_2\text{Cl}_2$  and 250  $\mu\text{L}$  MeOH were added to a 4 mL vial. Slow evaporation of the solvent in the air throughout about 24 h at room temperature, then a single-crystal product suitable for x-ray single-crystal diffraction analysis (colourless crystal) was obtained.

**mtl-2D-P6MOCN:** **P6PhPy4** (3.0 mg, 0.0019 mmol), 0.5 mL DMF, 50  $\mu\text{L}$   $\text{H}_2\text{O}$ ,  $\text{Cu}(\text{NO}_3)_2 \cdot 3\text{H}_2\text{O}$  (1.9 mg, 0.008 mmol), and 50  $\mu\text{L}$   $\text{CH}_3\text{COOH}$  vial was added a 4 mL vial. The mixture was heated at 80  $^\circ\text{C}$  for 24 h under airtight conditions, then a single-crystal product suitable for electron diffraction (blue crystal) was obtained.

**fl-2D-P6MOCN:** **P6PhPy4** (3.0 mg, 0.0019 mmol), 0.5 mL DMF, 50  $\mu\text{L}$   $\text{H}_2\text{O}$ ,  $\text{Cu}(\text{NO}_3)_2 \cdot 3\text{H}_2\text{O}$  (1.9 mg, 0.008 mmol), and 50  $\mu\text{L}$   $\text{CH}_3\text{COOH}$  vial was added a 4 mL vial. The mixture was heated at 80  $^\circ\text{C}$  for 2 weeks under airtight conditions, and then a single-crystal product suitable for electron diffraction (green crystal) was obtained.

**bl-2D-P6MOCN:** The crystals of **mtl-2D-P6MOCN/fl-2D-P6MOCN** were redissolved at 120  $^\circ\text{C}$  and then heated at 80  $^\circ\text{C}$  for 72 h under airtight conditions, and then a single-crystal product suitable for electron diffraction (green crystal) was obtained.

**sbl-2D-P6MOCN/sbl-2D-P6MOCN-2:** **P6PhPy4** (3.0 mg, 0.0019 mmol), 0.5 mL DMF, 50  $\mu\text{L}$   $\text{H}_2\text{O}$ ,  $\text{Cu}(\text{NO}_3)_2 \cdot 3\text{H}_2\text{O}$  (1.9 mg, 0.008 mmol), 5  $\mu\text{L}$  adiponitrile and 50  $\mu\text{L}$   $\text{CH}_3\text{COOH}$  vial was added a 4 mL vial. The mixture was heated at 80  $^\circ\text{C}$  for 3 days or 10 days under airtight conditions, then a single-crystal product suitable for electron diffraction (blue crystal) was obtained.

**R-bl-2D-P6MOCN:** **R-P6PhPy4** (3.0 mg, 0.0019 mmol), 0.5 mL DMF, 50  $\mu\text{L}$   $\text{H}_2\text{O}$ ,  $\text{Cu}(\text{NO}_3)_2 \cdot 3\text{H}_2\text{O}$  (1.9 mg, 0.008 mmol), and 50  $\mu\text{L}$   $\text{CH}_3\text{COOH}$  vial was added a 4 mL vial. The mixture was heated at 80  $^\circ\text{C}$  for 24 h under airtight conditions, and then a single-crystal product suitable for electron diffraction (blue crystal) was obtained.

**S-bl-2D-P6MOCN:** **S-P6PhPy4** (3.0 mg, 0.0019 mmol), 0.5 mL DMF, 50  $\mu\text{L}$   $\text{H}_2\text{O}$ ,  $\text{Cu}(\text{NO}_3)_2 \cdot 3\text{H}_2\text{O}$  (1.9 mg, 0.008 mmol), and 50  $\mu\text{L}$   $\text{CH}_3\text{COOH}$  vial were added a 4 mL vial. The mixture was heated at 80  $^\circ\text{C}$  for 24 h under airtight conditions, and then a single-crystal product suitable for electron diffraction (blue crystal) was obtained.

**I2@mtl-2D-P6MOCN:** **mtl-2D-P6MOCN** (1.0 mg) and the aqueous solution of  $\text{I}_2$  (1.0 mM, 2.5 mL) were added to a 4 mL vial. The mixture was allowed to stand for 10 h, and the aqueous solution of  $\text{I}_2$  (1.0 mM, 2.5 mL) changed from yellowish brown to colourless transparent, and the crystals of **mtl-2D-P6MOCN** changed from blue to reddish-brown.

## Characterization data of metal-organic coordination polymers

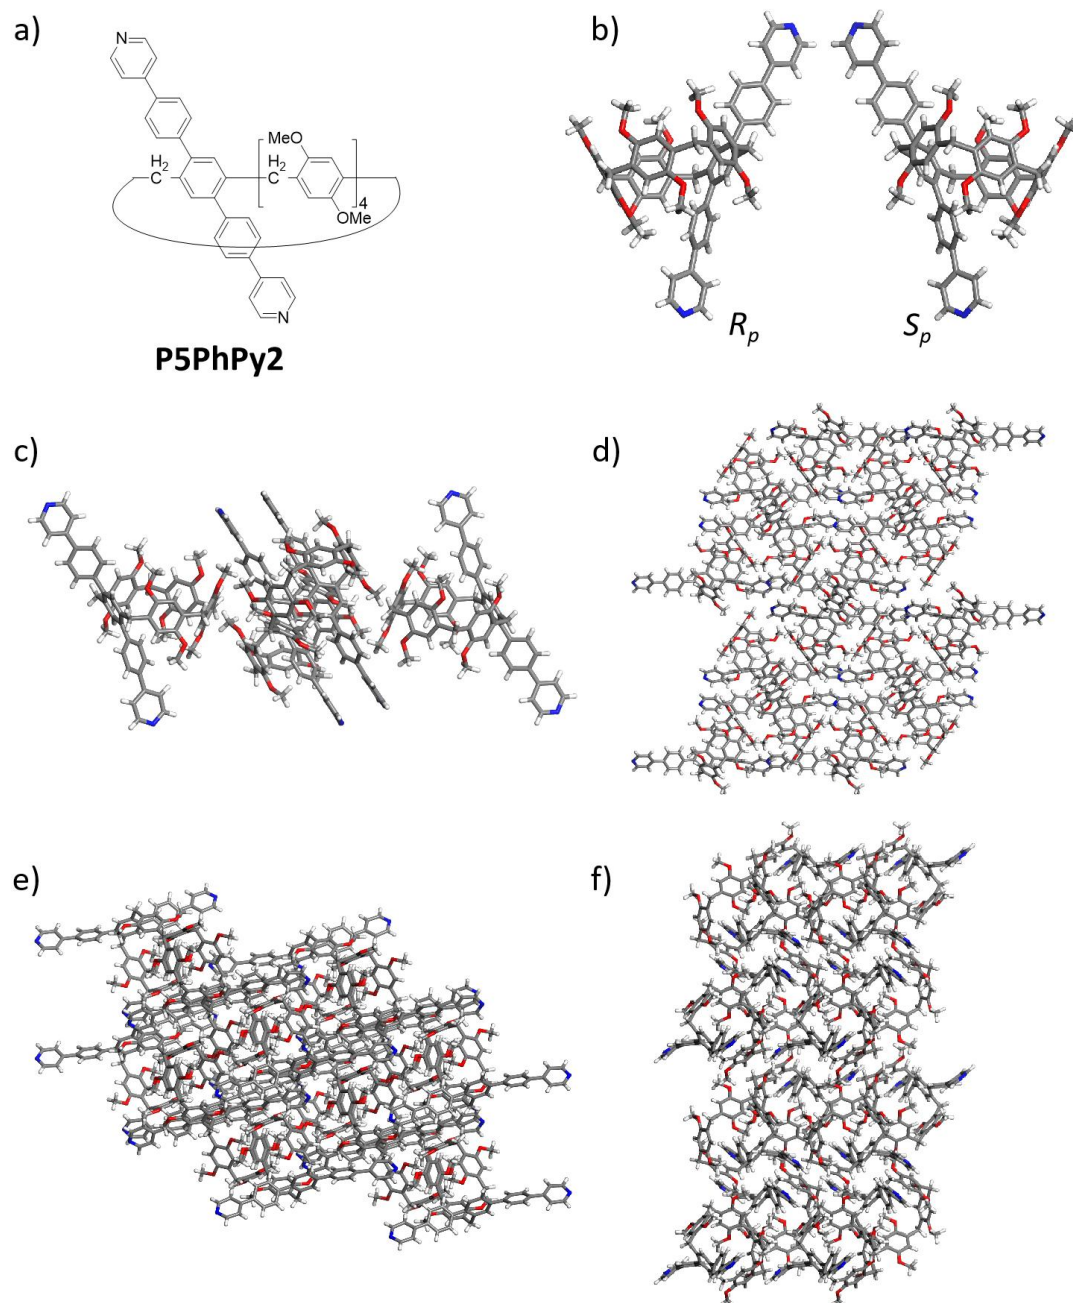

**Figure S1.** Compounds **P5PhPy2** (a) and the crystal structure of **P5PhPy2** ( $R_p$ ,  $S_p$ ) (b-c) and the top view demonstrating a compact packing manner in the (1,0,0), (0,1,0) and (0,0,1) direction (d-f).

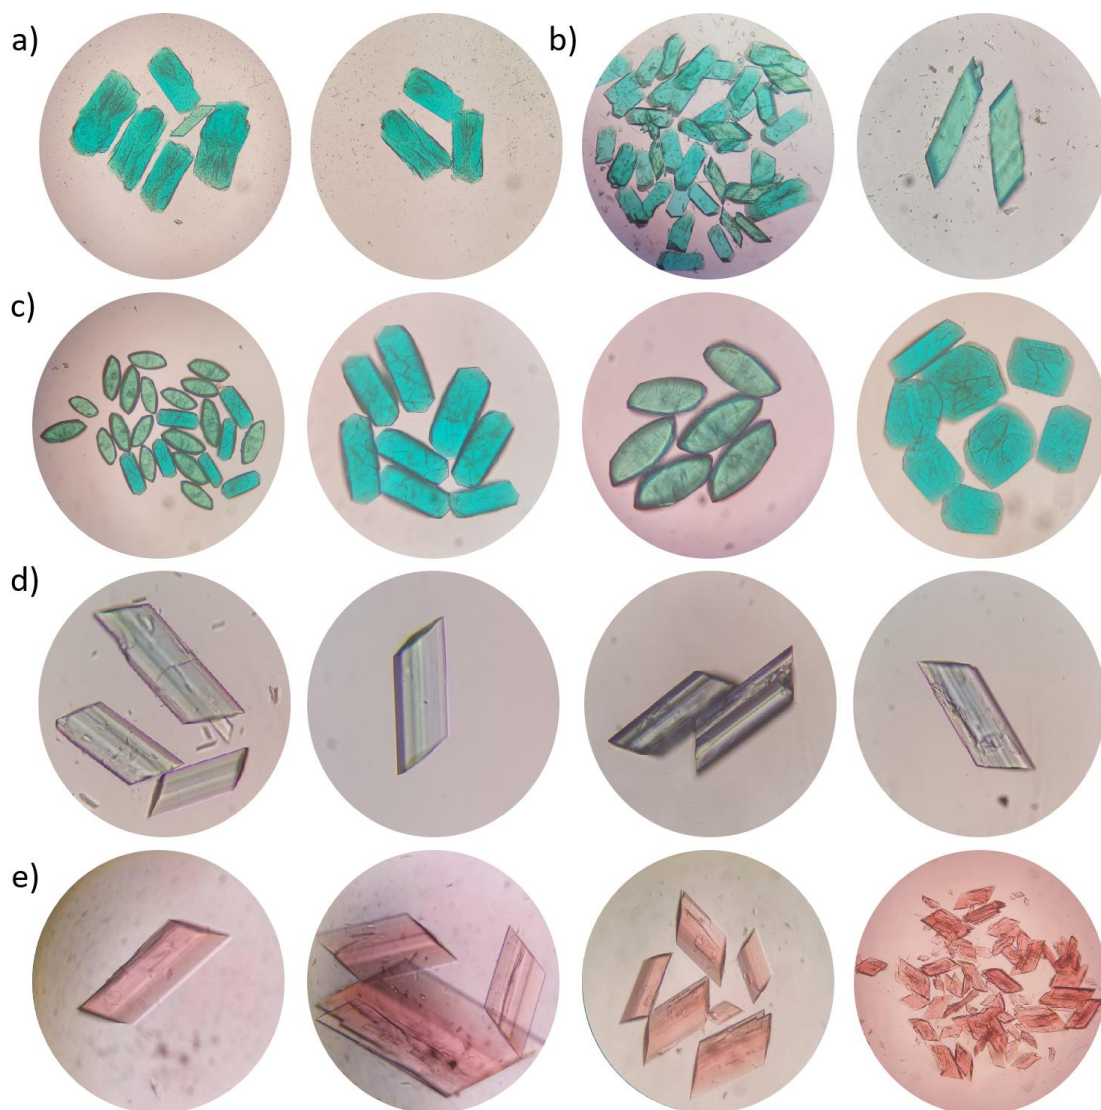

**Figure S2.** Microscope images of **P5PhPy2Cu-1** (a), **P5PhPy2Cu-2** (b), **P5PhPy2Cu-3** (c), **P5PhPy2Cu-4** (d) and **P5PhPy2Co-1** (e).

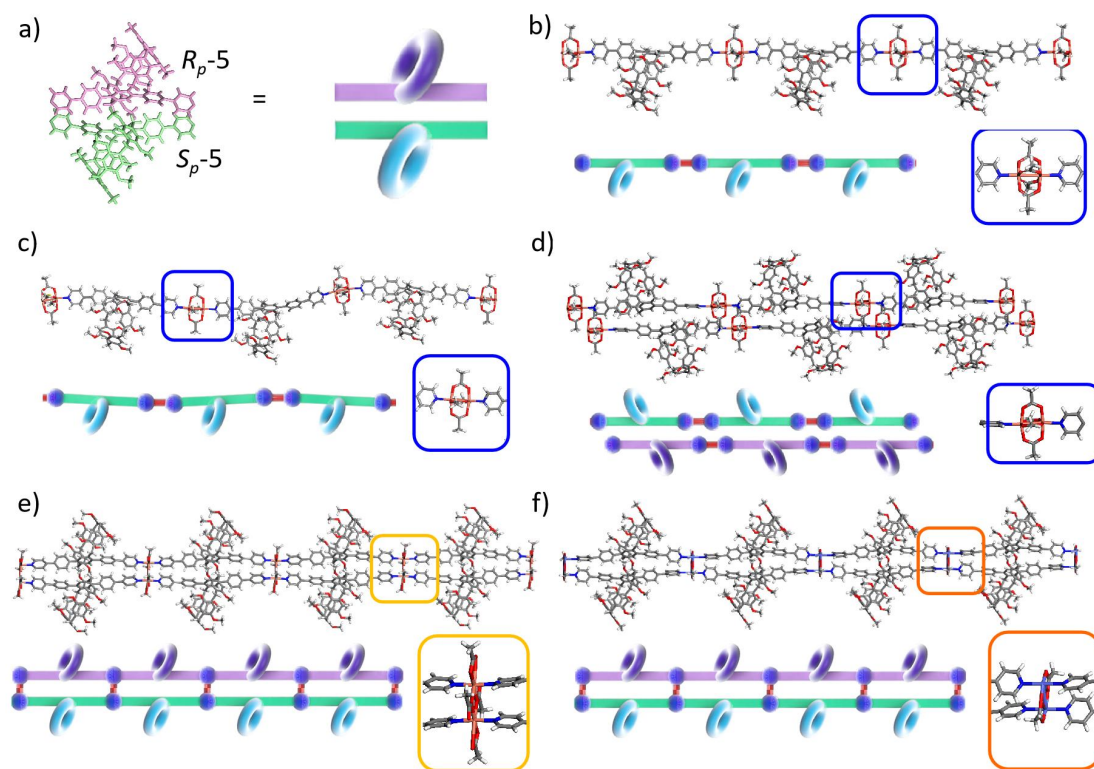

**Figure S3.** The crystal structure and diagram of **P5PhPy2** ( $R_p$ ,  $S_p$ ), 1D coordination of the polymer **P5PhPy2Cu-1** and **P5PhPy2Cu-2** (b and c), parallel 1D coordinations of the polymer **P5PhPy2Cu-3** (d), ladder-like 1D coordination polymer **P5PhPy2Cu-4** and **P5PhPy2Co-1** (e and f). Noncoordinated solvent molecules are omitted.



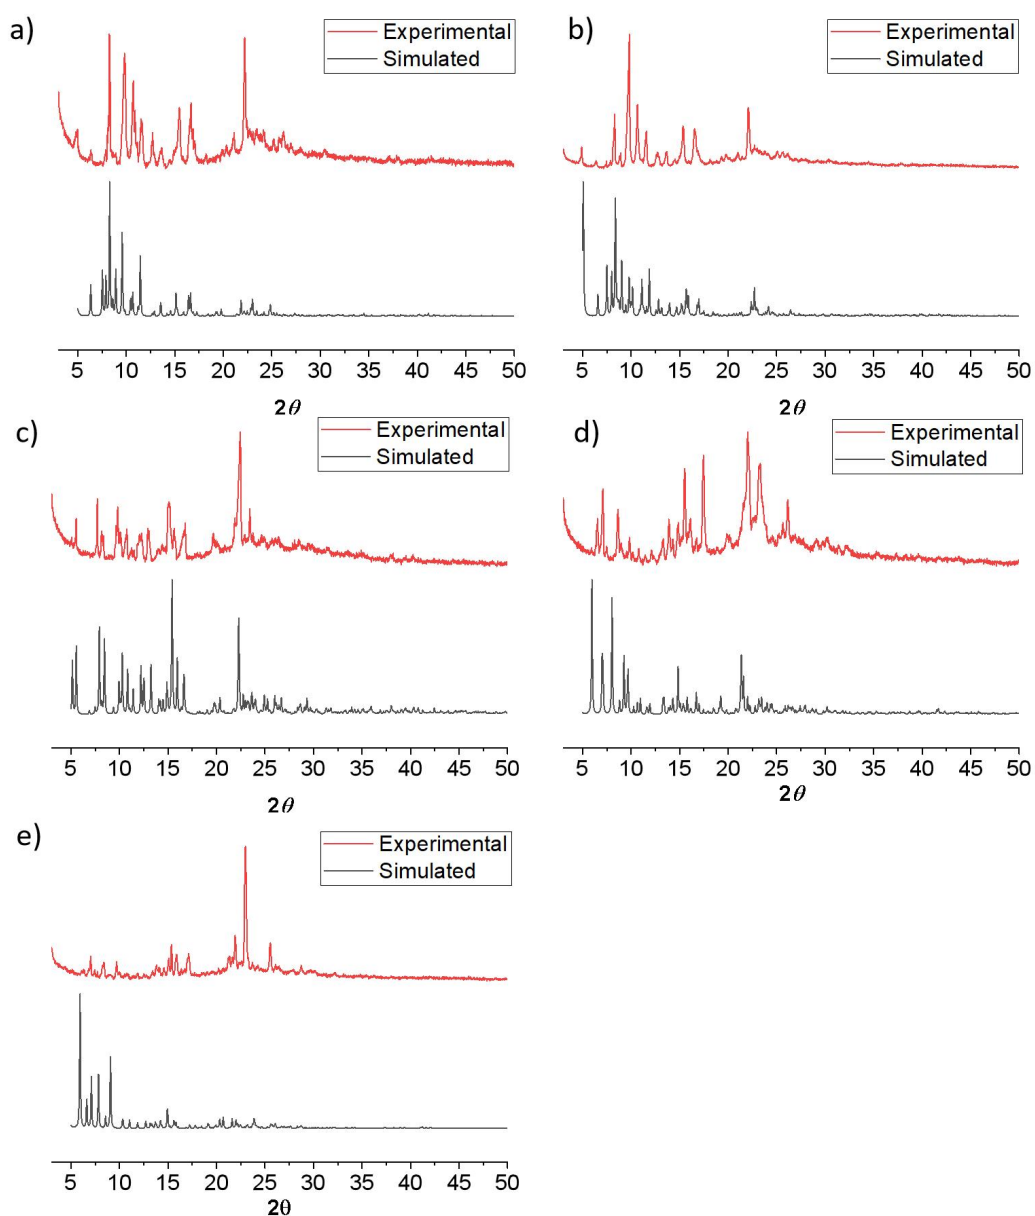

**Figure S4.** Experimental (red) and simulated (black) PXRD patterns of **P5PhPy4Cu-1** (a), **P5PhPy4Cu-2** (b), **P5PhPy4Cu-3** (c), **P5PhPy4Cu-4** (d) and **P5PhPy4Co-1** (e).

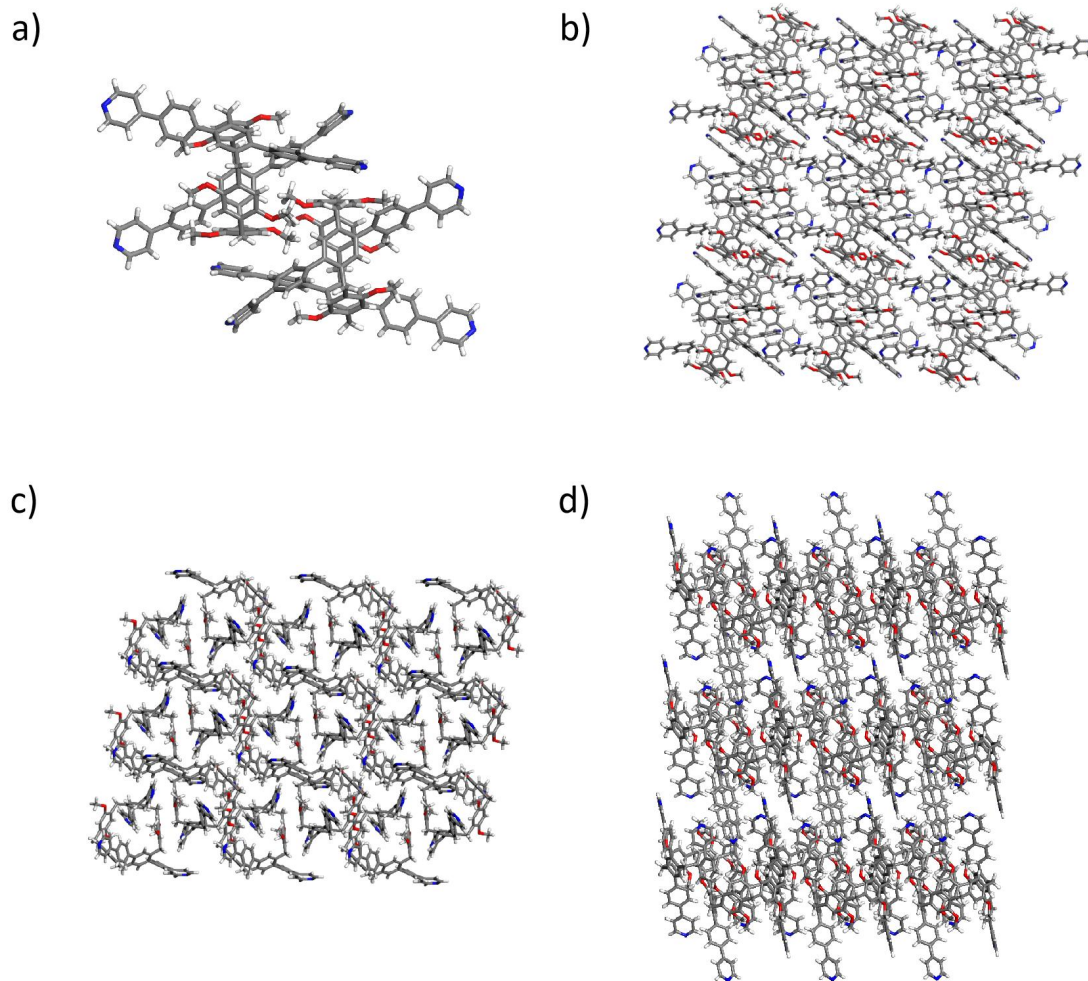

**Figure S5.** The crystal structure of **P5PhPy4** (a), and the top view demonstrating a compact packing manner in the (1,0,0), (0,1,0) and (0,0,1) direction (b-d).



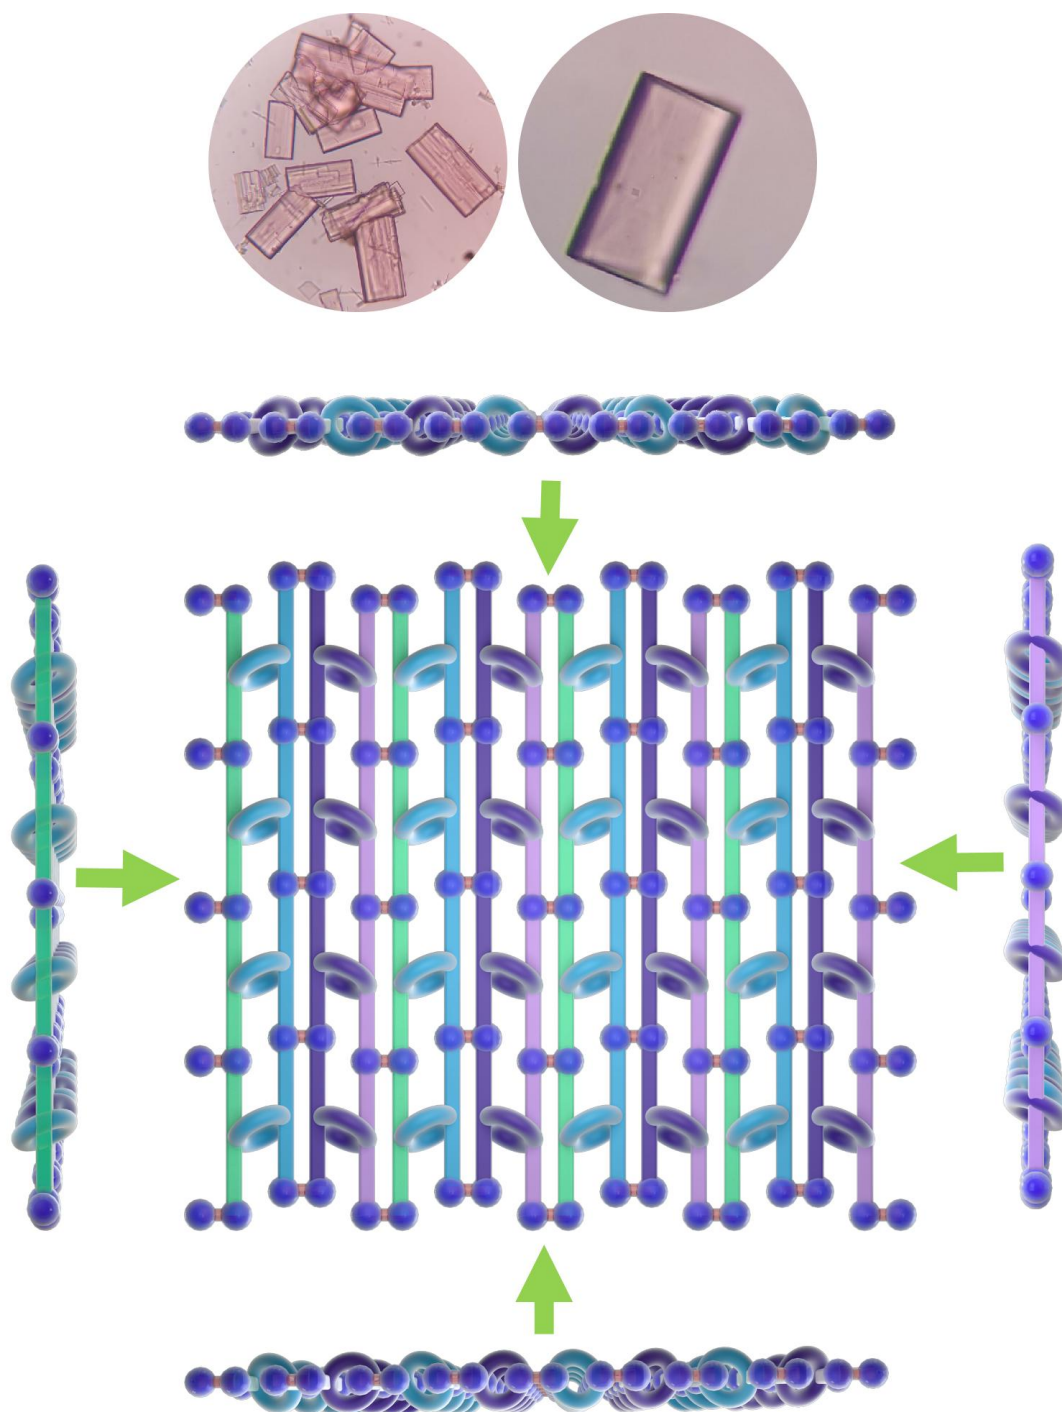

**Figure S6.** Microscope images of **ml-2D-P5MOCN** and the side and top cartoon view of a single layer 2D coordination the polymer **ml-2D-P5MOCN**.

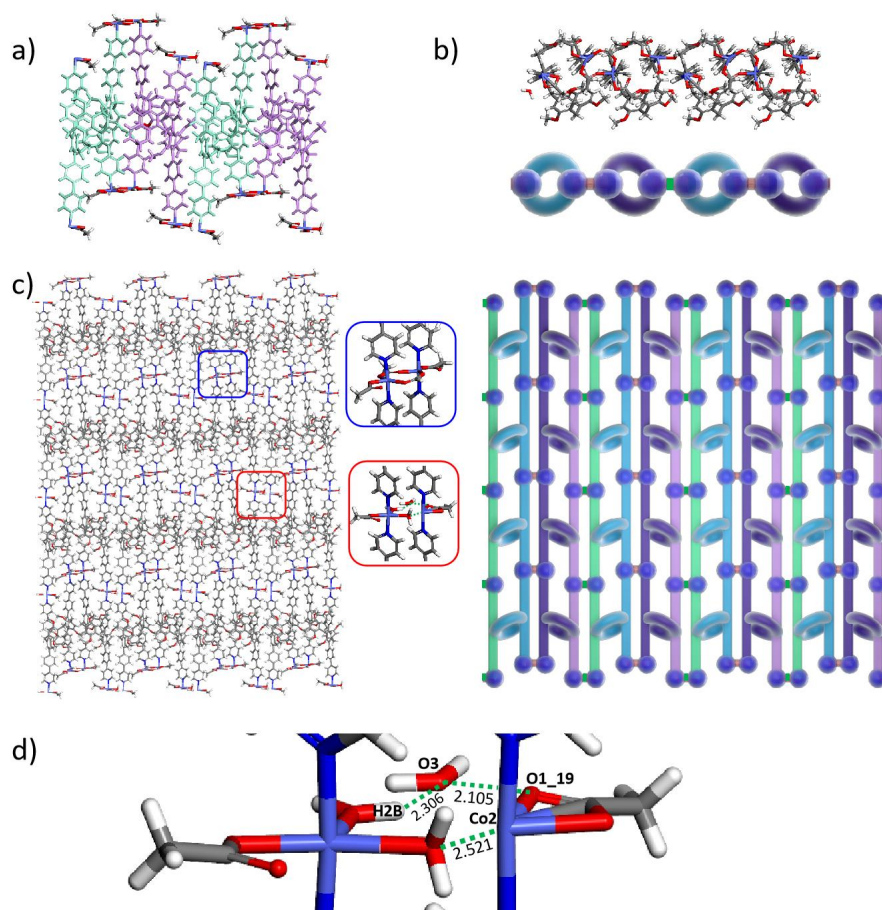

**Figure S7.** a) The crystal structure and diagram of the coordination between **P5PhPy4** (Rp-5 and Sp-5) and Co(II). b) The side view of a single layer 2D coordination the polymer **ml-2D-P5MOCN**. c) The top view of a single layer 2D coordination the polymer **ml-2D-P5MOCN**. d) The hydrogen bond in 2D coordination the polymer **ml-2D-P5MOCN**.

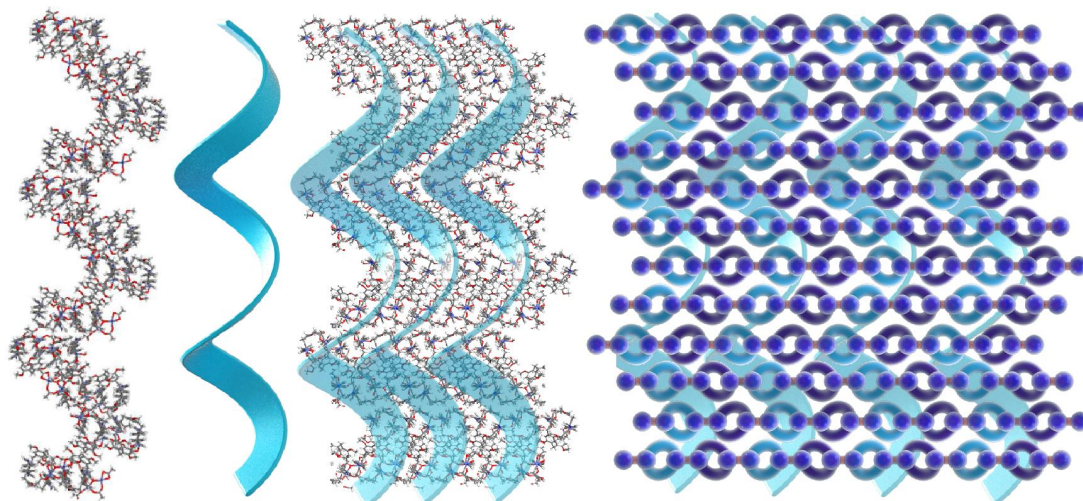

**Figure S8.** The lateral side view shows that the pillar[5]arene units in the laminated structure are arranged in a microhelix-like S-shaped curve .

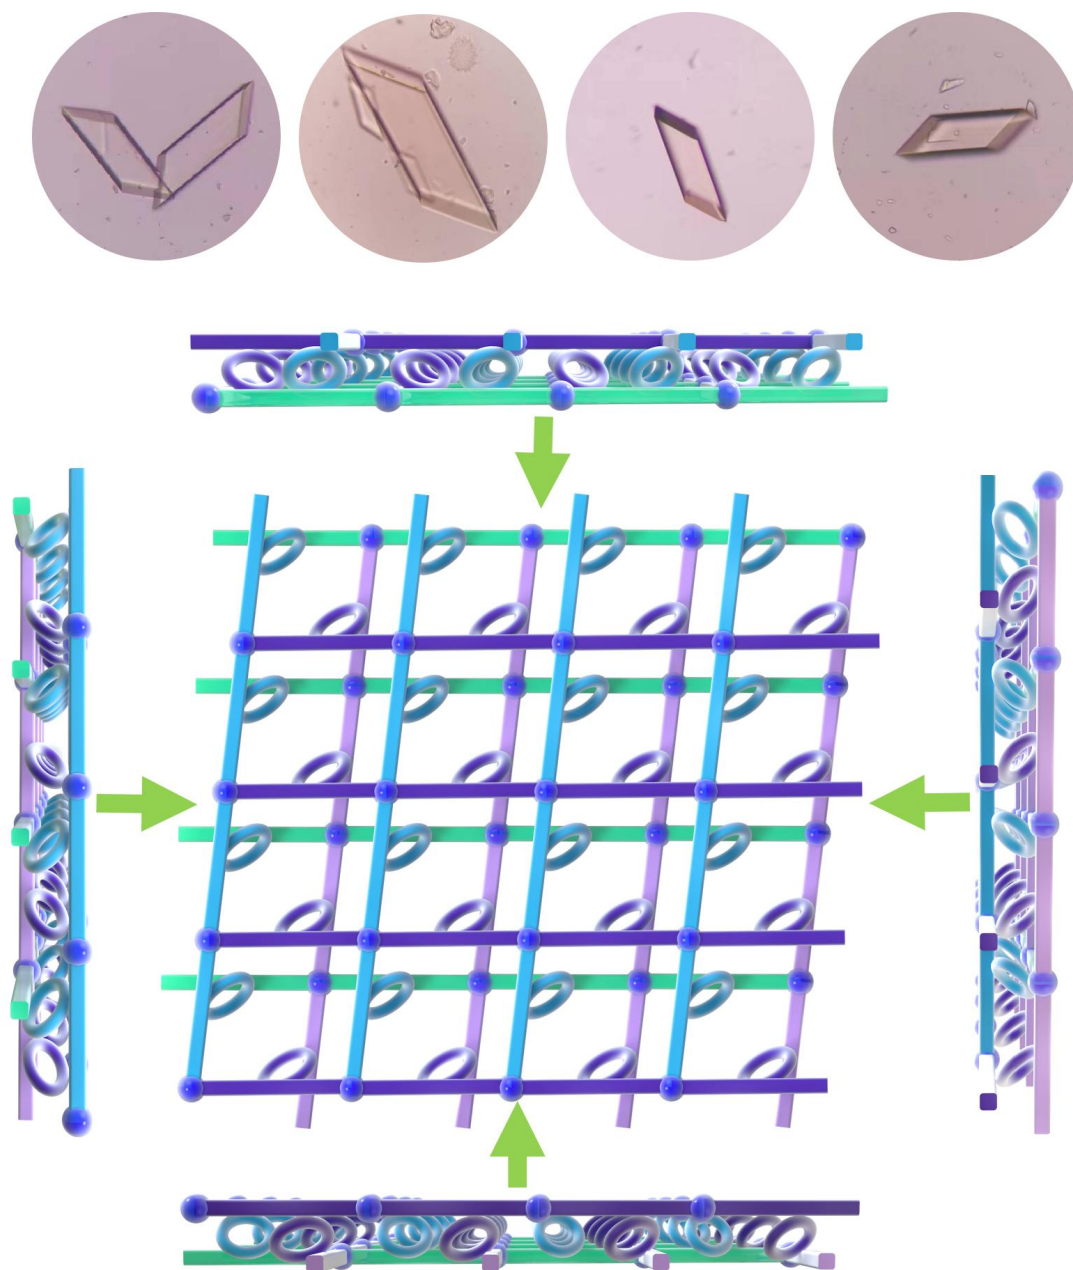

**Figure S9.** Microscope images of **bl-2D-P5MOCN** and the side and top cartoon view of a single layer 2D coordination the polymer **bl-2D-P5MOCN**.

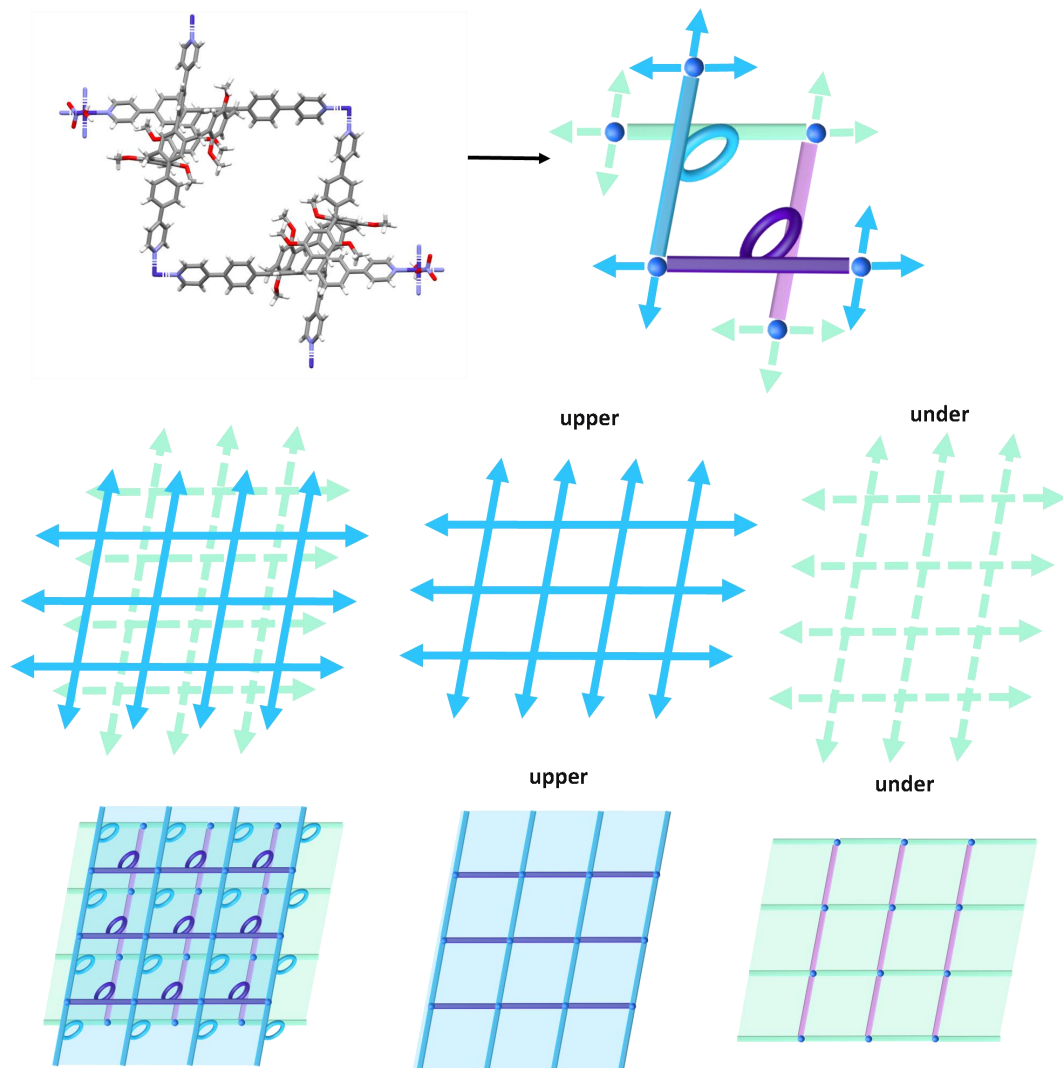

**Figure S10.** The crystal structure and diagram of the coordination between **P5PhPy4** and Co(II).



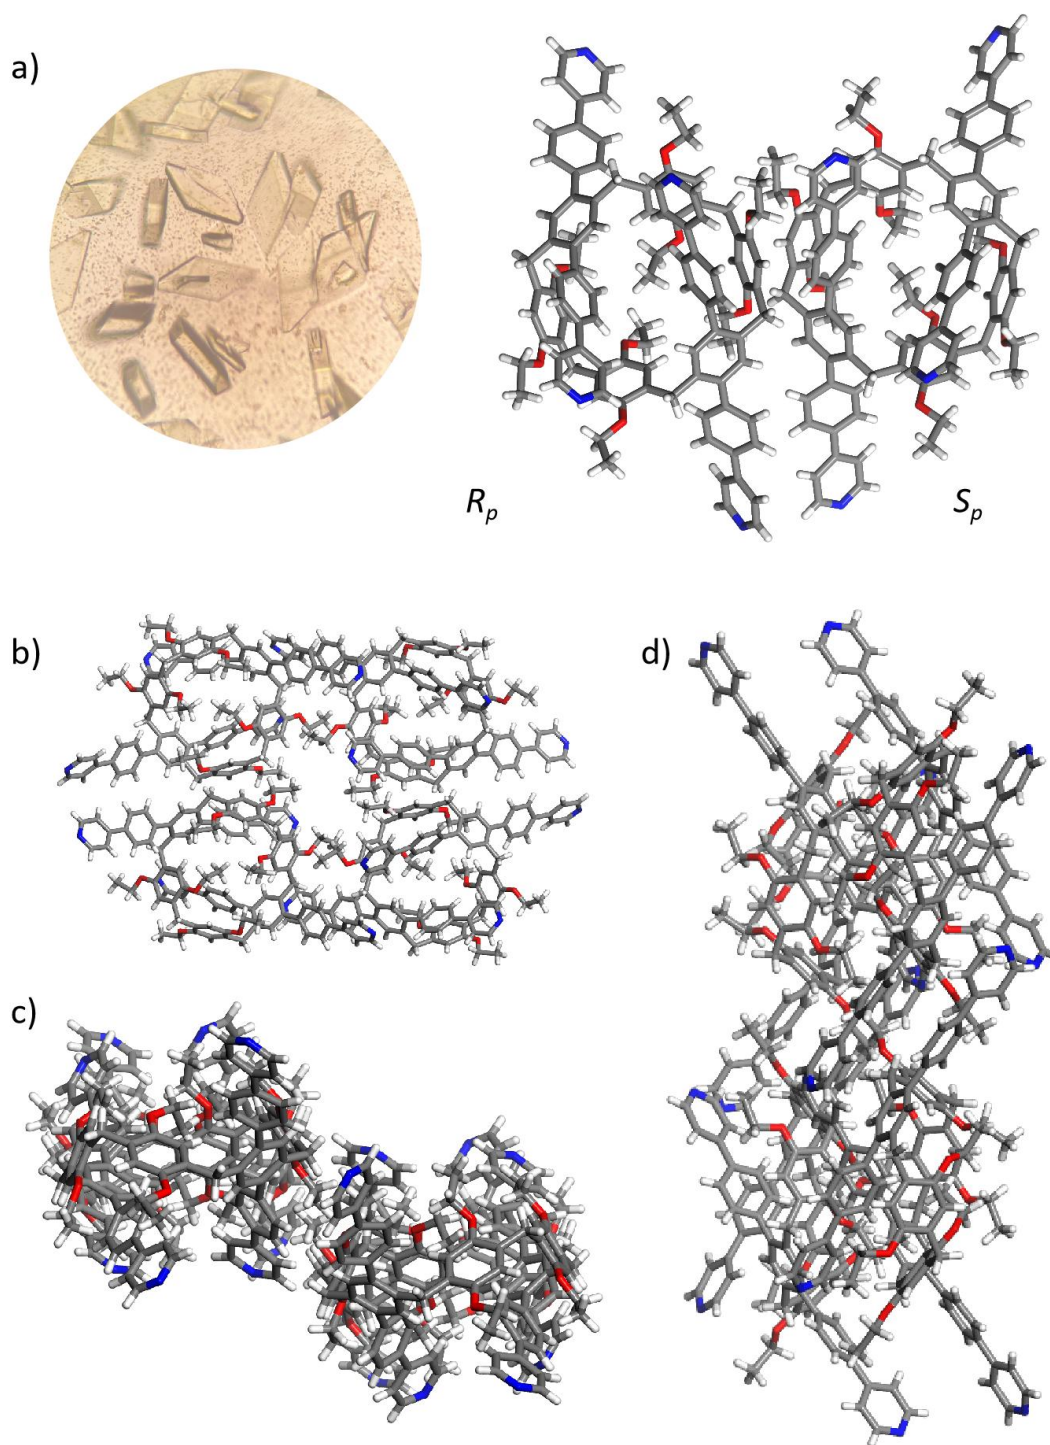

**Figure S11.** The microscope images and crystal structure of **P6PhPy4** (a) and the top view demonstrating a compact packing manner in the (1,0,0), (0,1,0) and (0,0,1) direction (b-d).

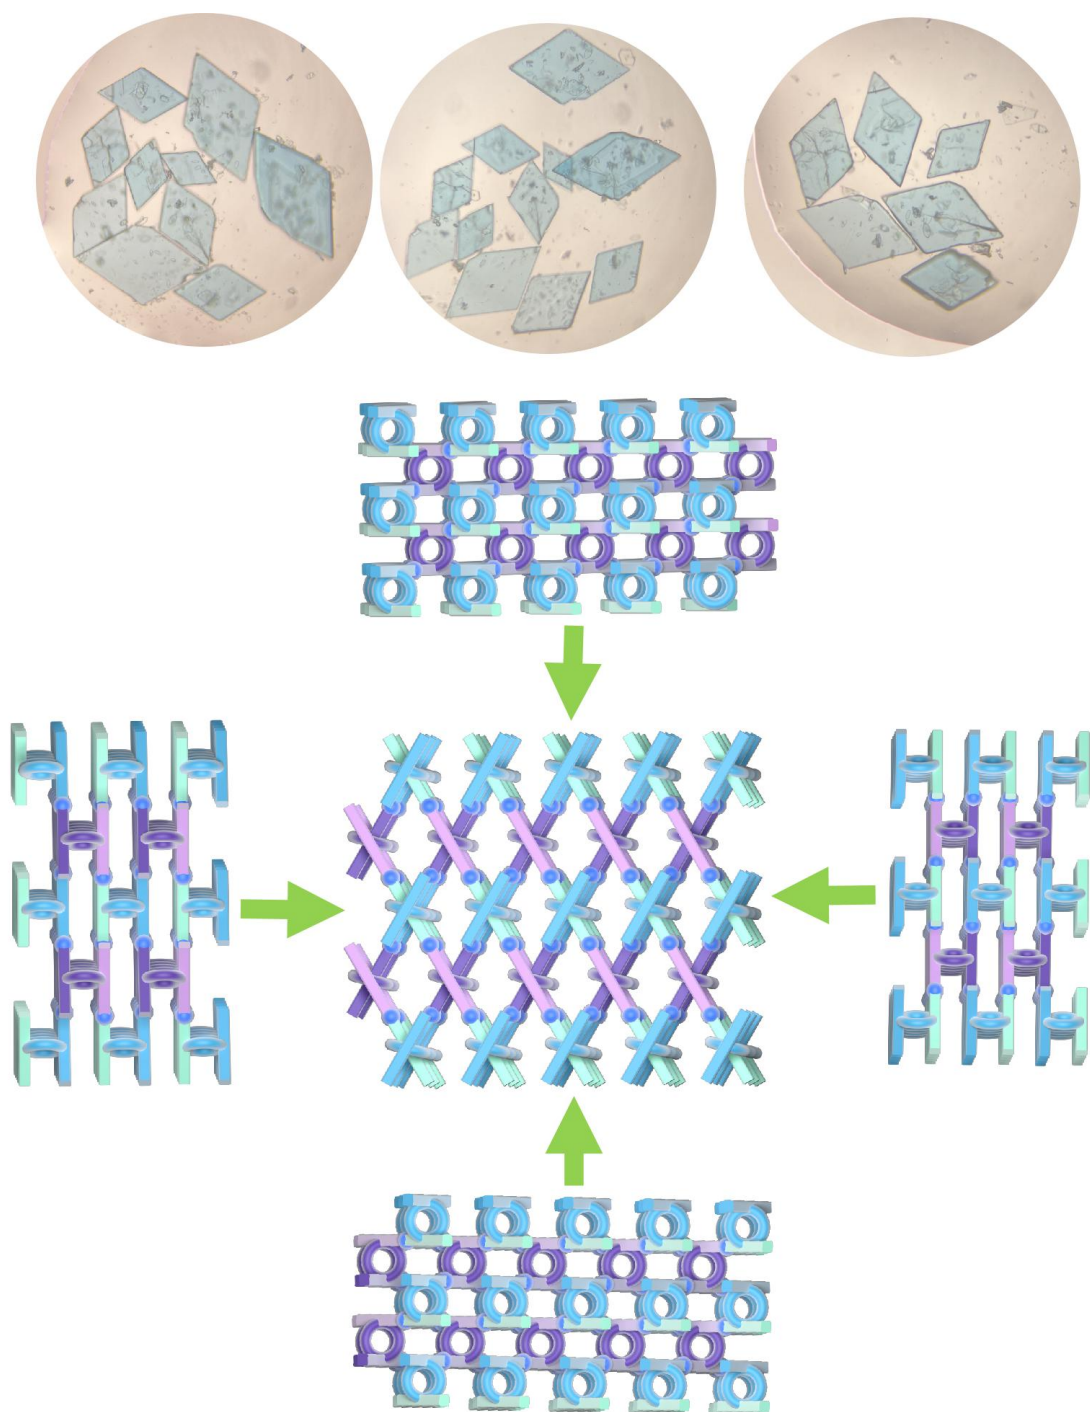

**Figure S12.** Microscope images of **mtl-2D-P6MOCN** and the top and side carton view of a single layer 2D coordination the polymer **mtl-2D-P6MOCN**.

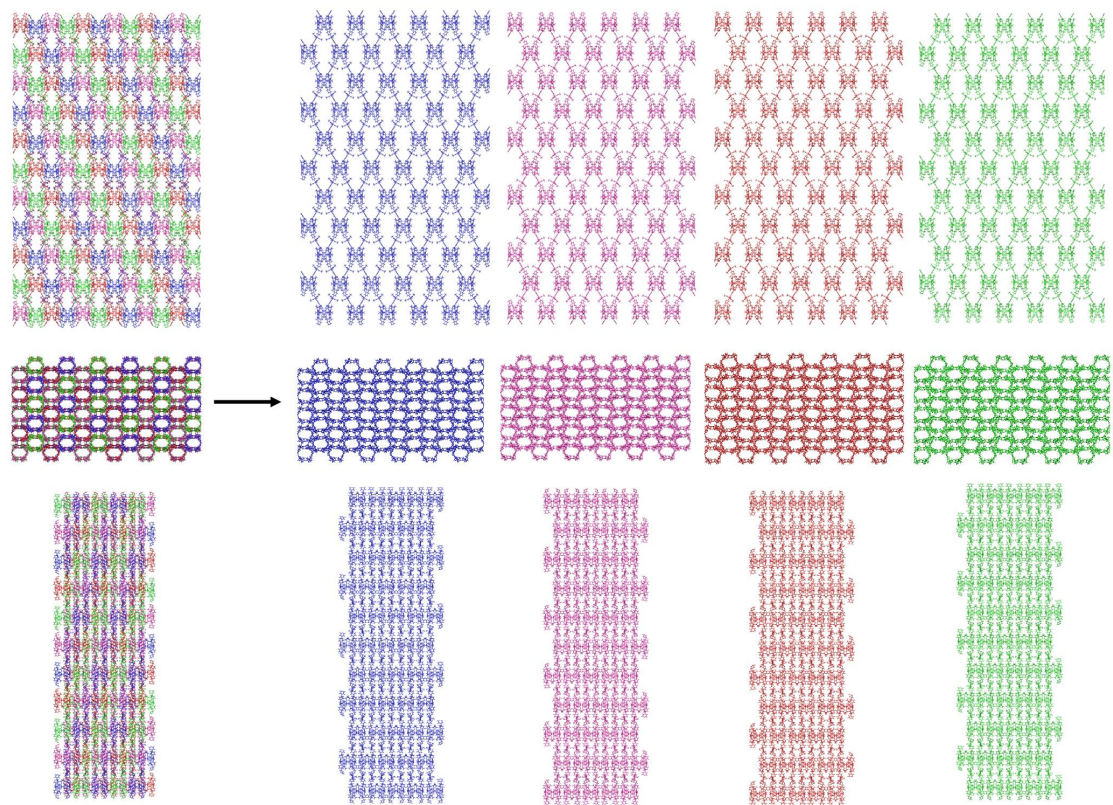

**Figure S13.** The four-fold interpenetrating structure of **mtl-2D-P6MOCN**.



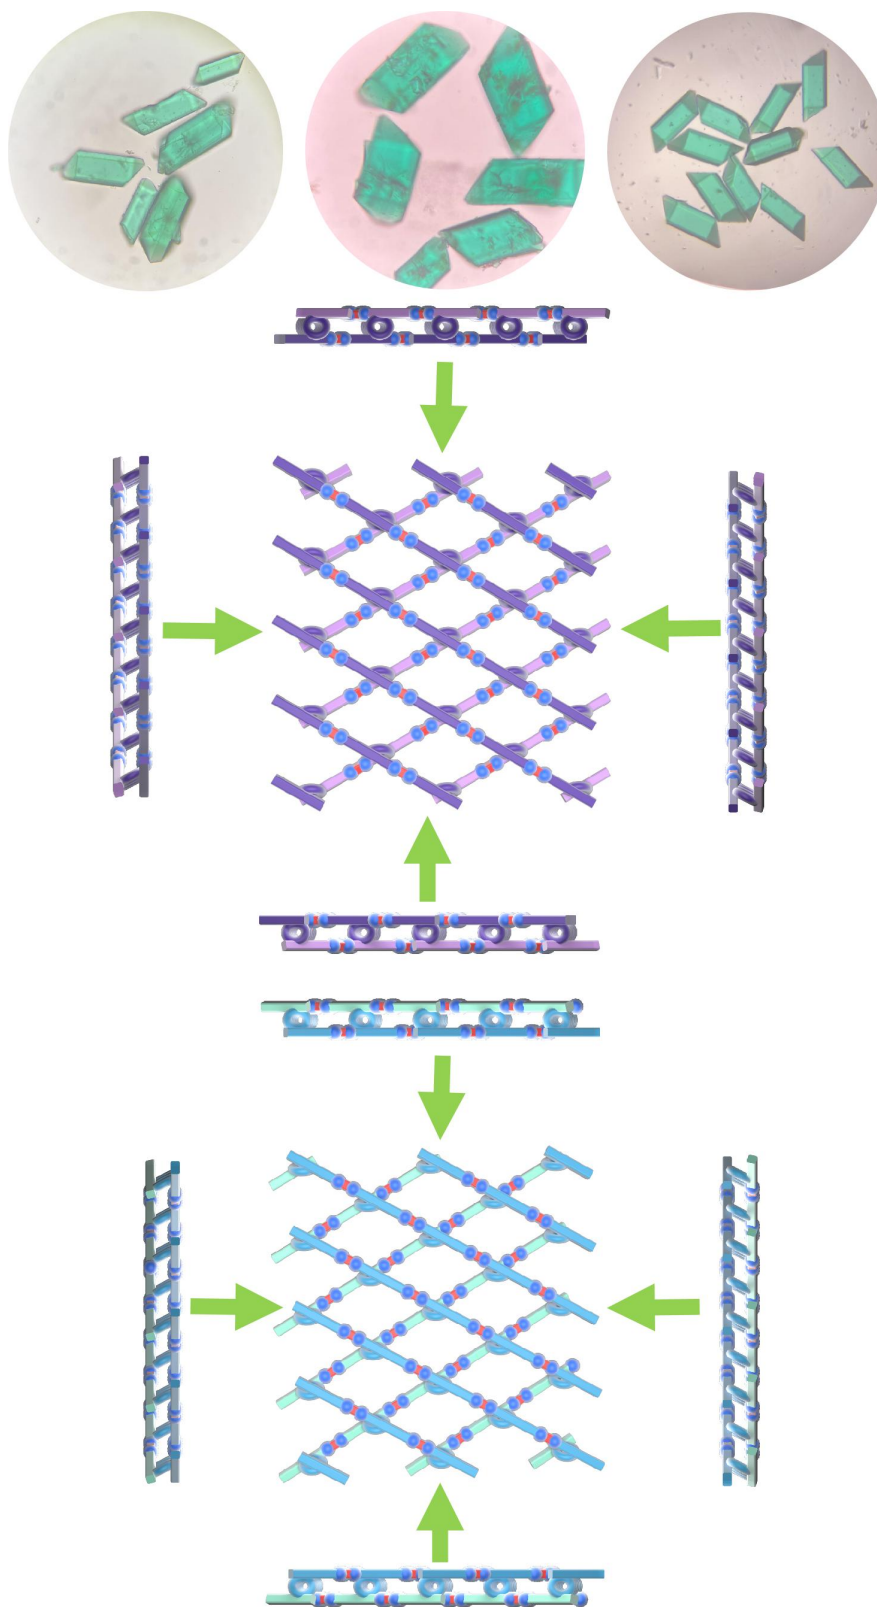

**Figure S14.** Microscope images of **bl-2D-P6MOCN** and the top and side cartoon view of a single layer 2D coordination the polymer **bl-2D-P6MOCN** (R and S).

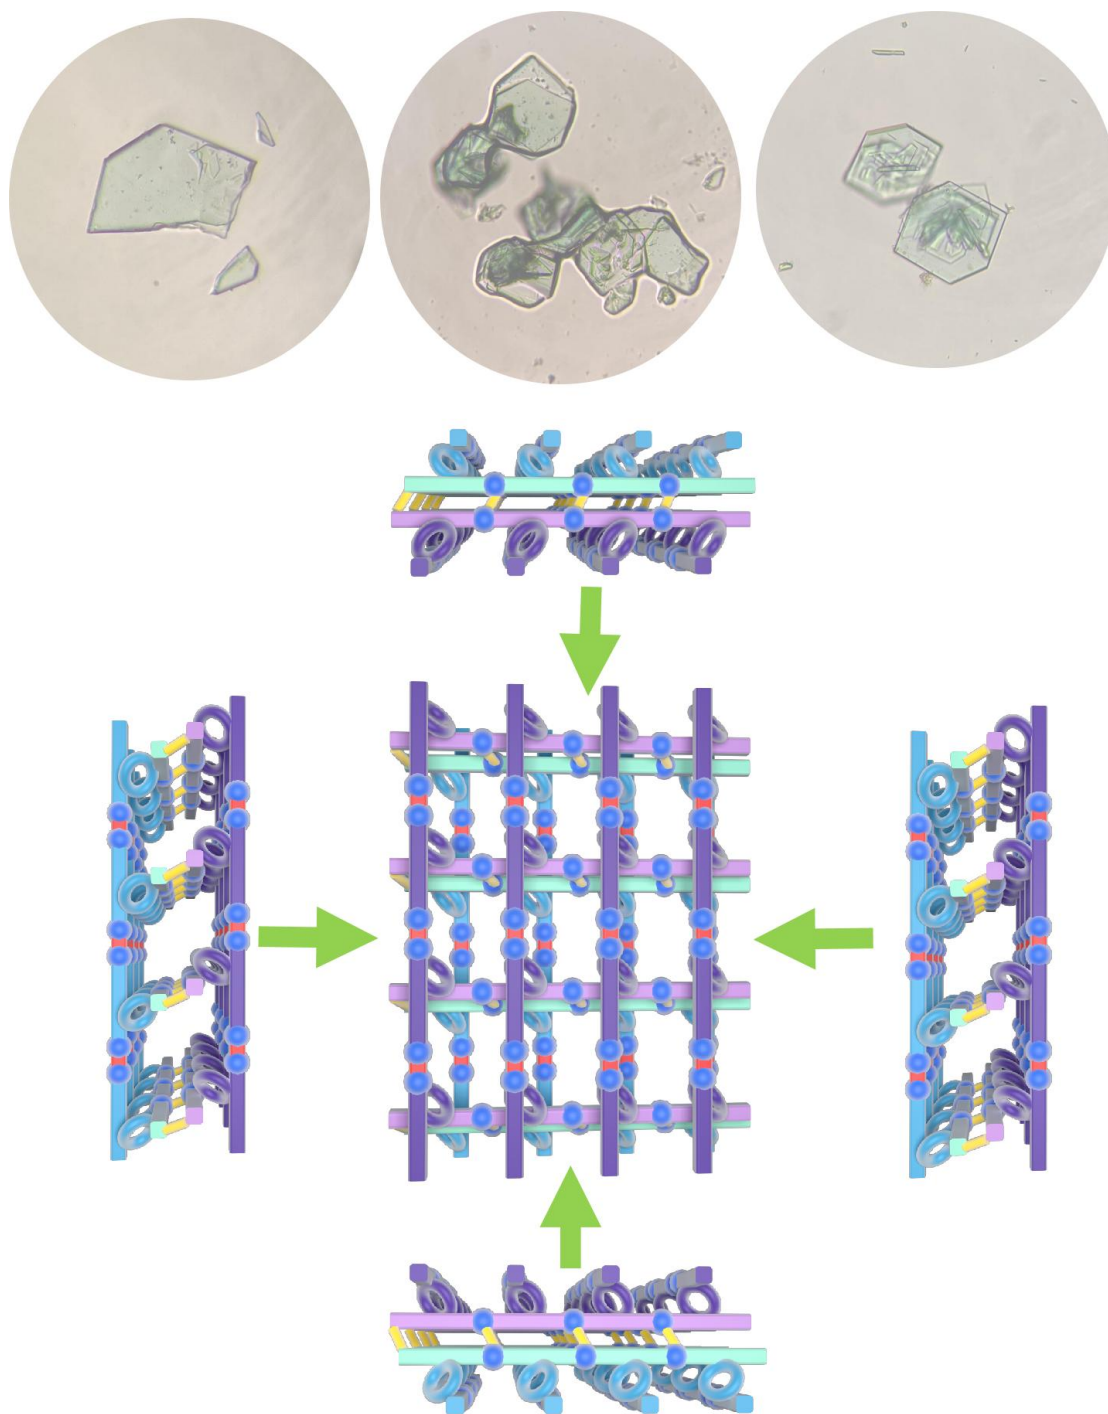

**Figure S15.** Microscope images of **fi-2D-P6MOCN** and the top and side carton view of a single layer 2D coordination the polymer **fi-2D-P6MOCN**.

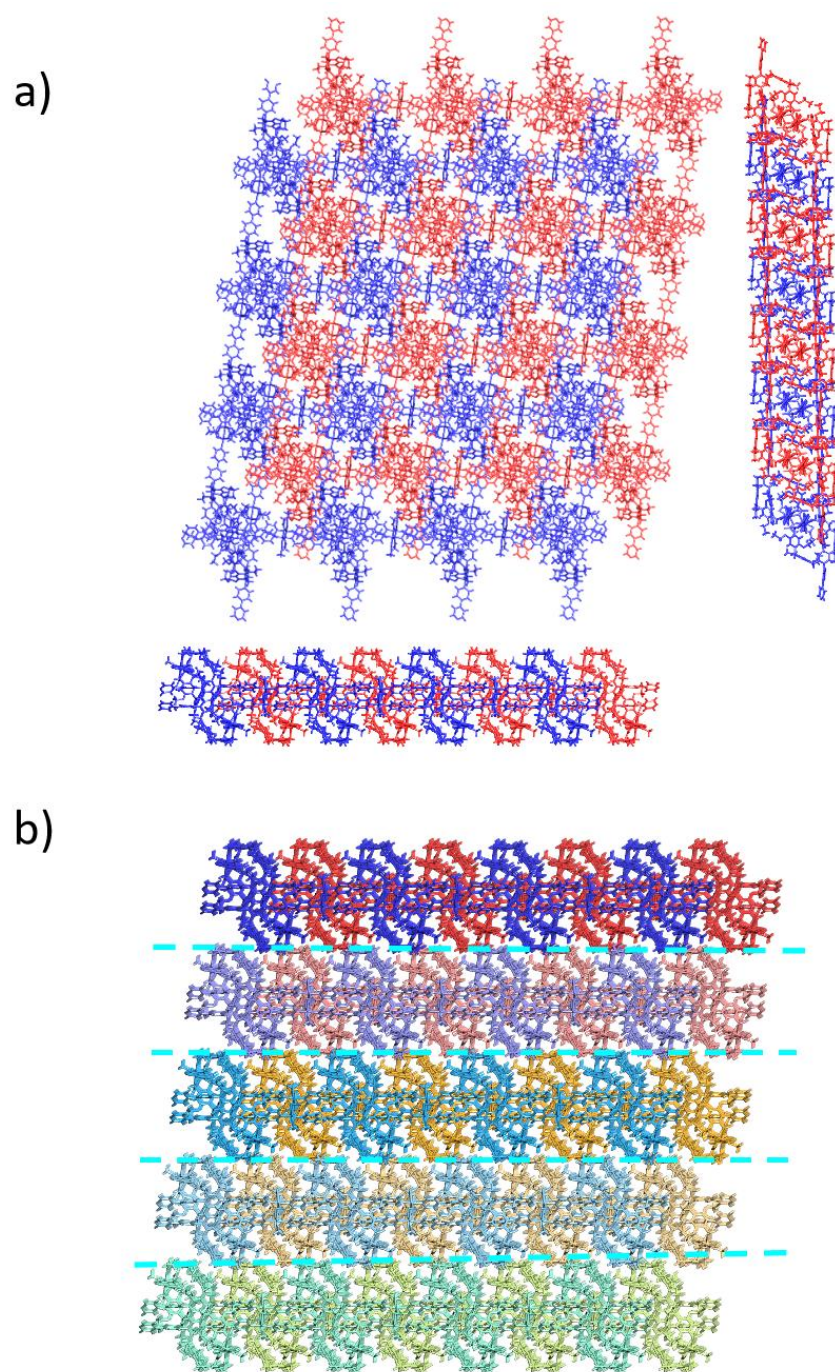

**Figure S16.** The two-fold interpenetrating structure of **fl-2D-P6MOCN** (a) and layer upon layer form of **fl-2D-P6MOCN** (b).



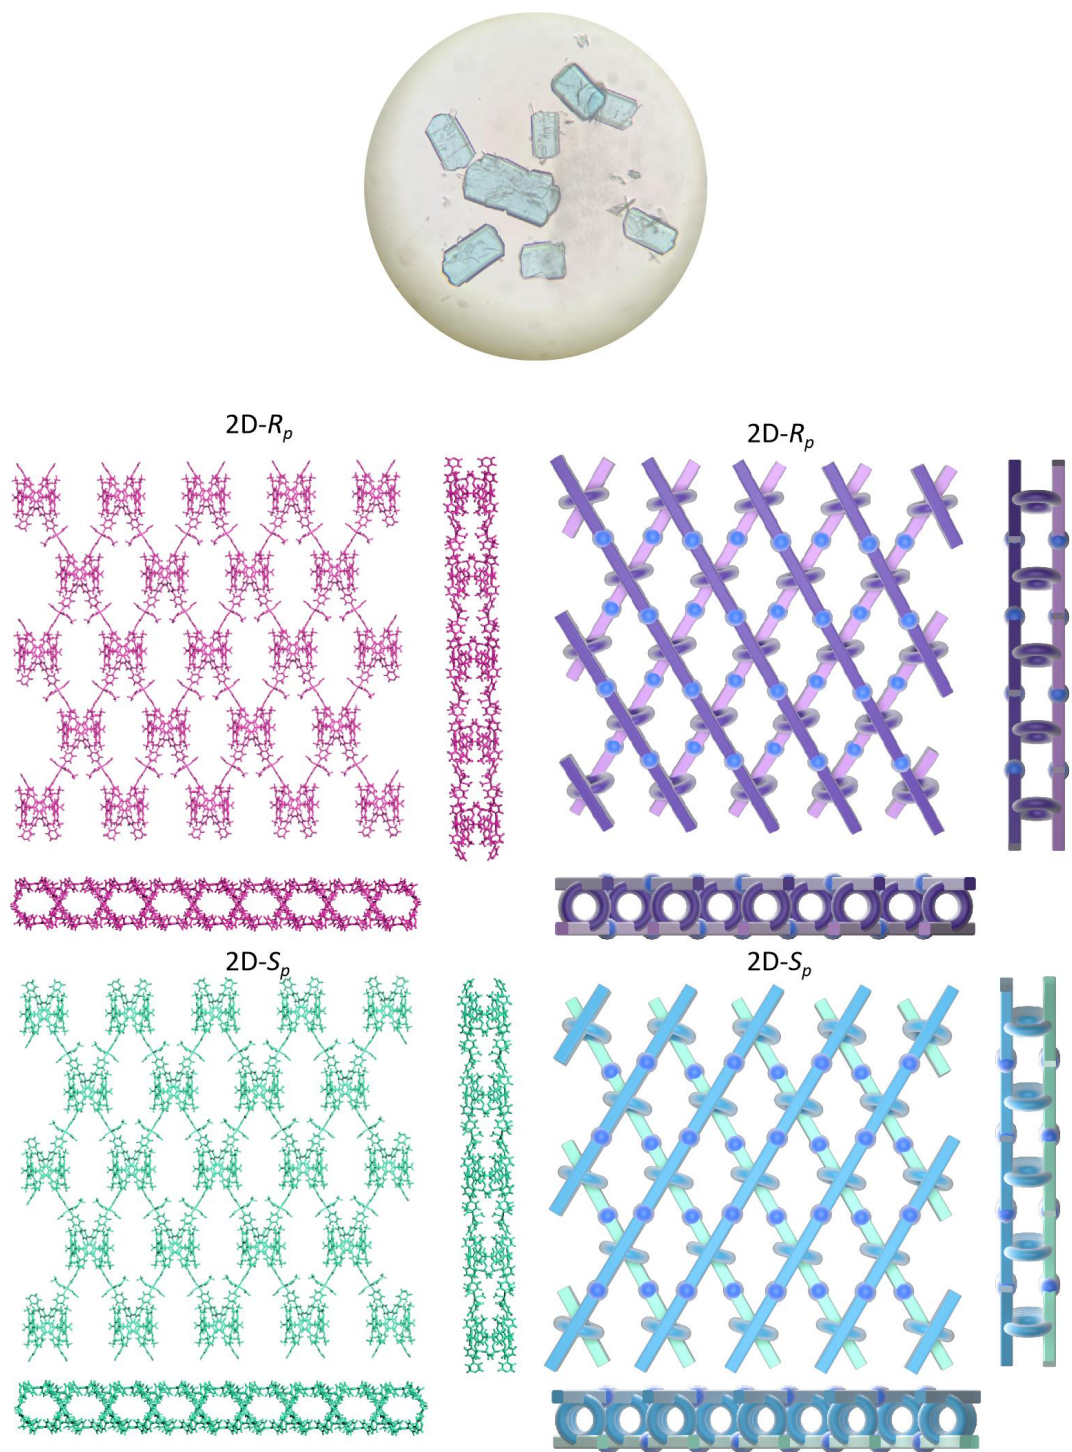

**Figure S17.** Microscope images of **sbi-2D-P6MOCN** and the top and side carton view of the polymer **sbi-2D-P6MOCN**.

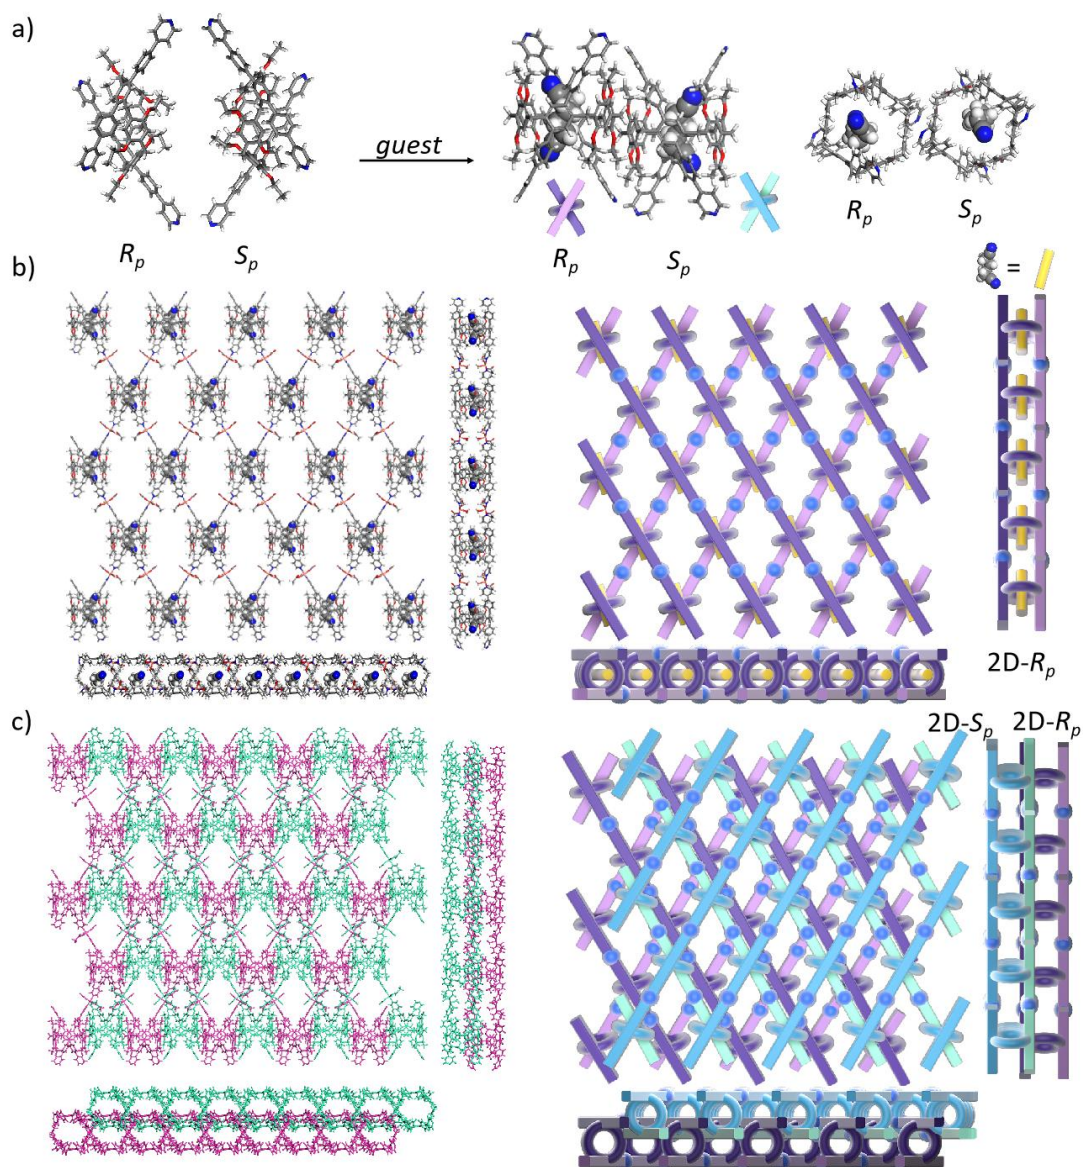

**Figure S18.** The top and side view of **sb1-2D-P6MOCN** (3 days).

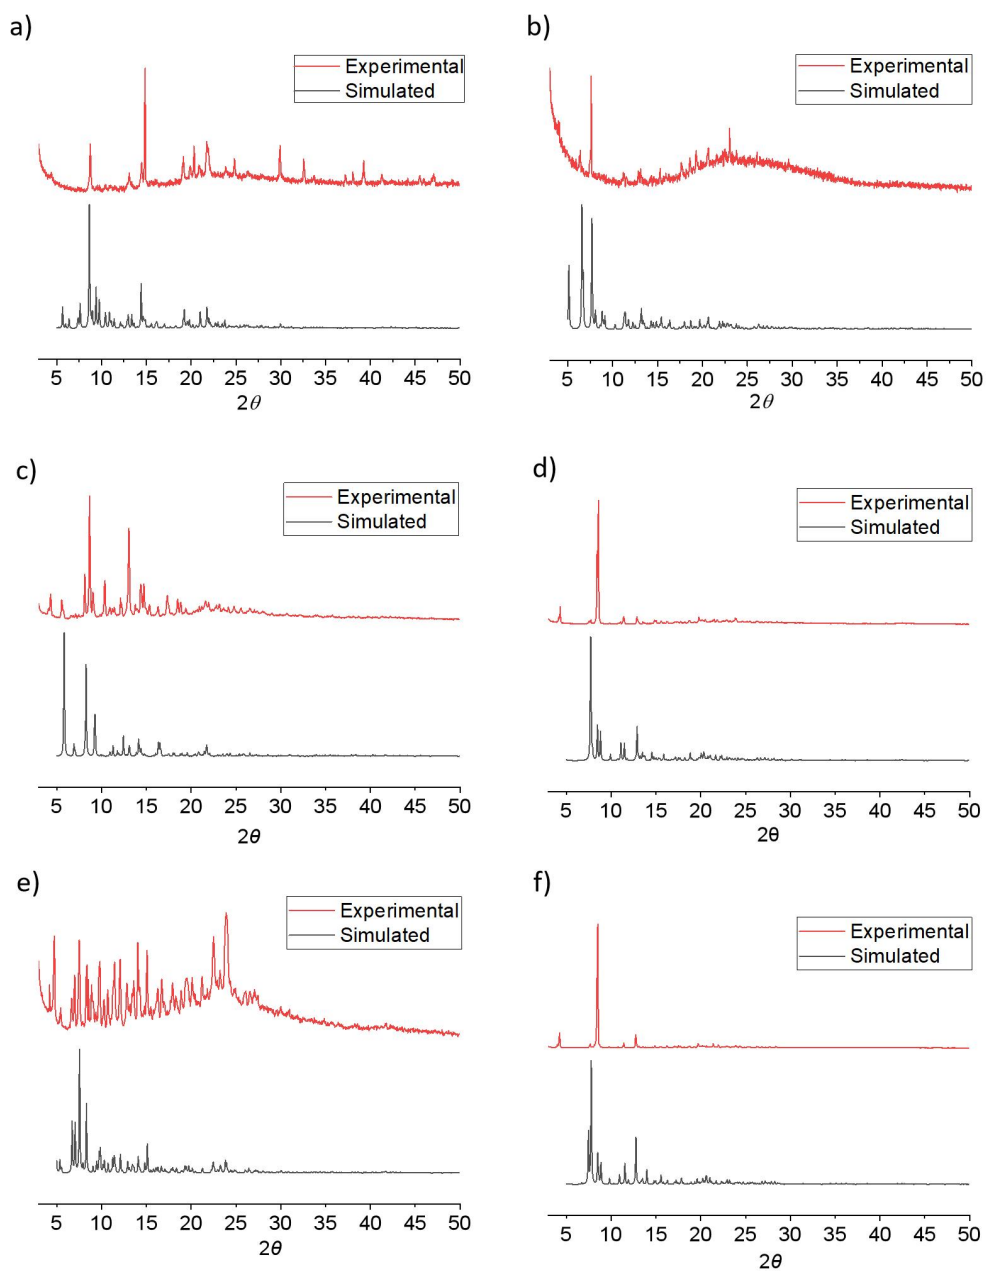

**Figure S19.** Experimental (red) and simulated (black) PXRD patterns of **ml-2D-P5MOCN** (a), **bl-2D-P5MOCN** (b), **bl-2D-P6MOCN** (c), **sbI-2D-P6MOCN** (d), **fl-2D-P6MOCN** (e) and **mtI-2D-P6MOCN** (f).

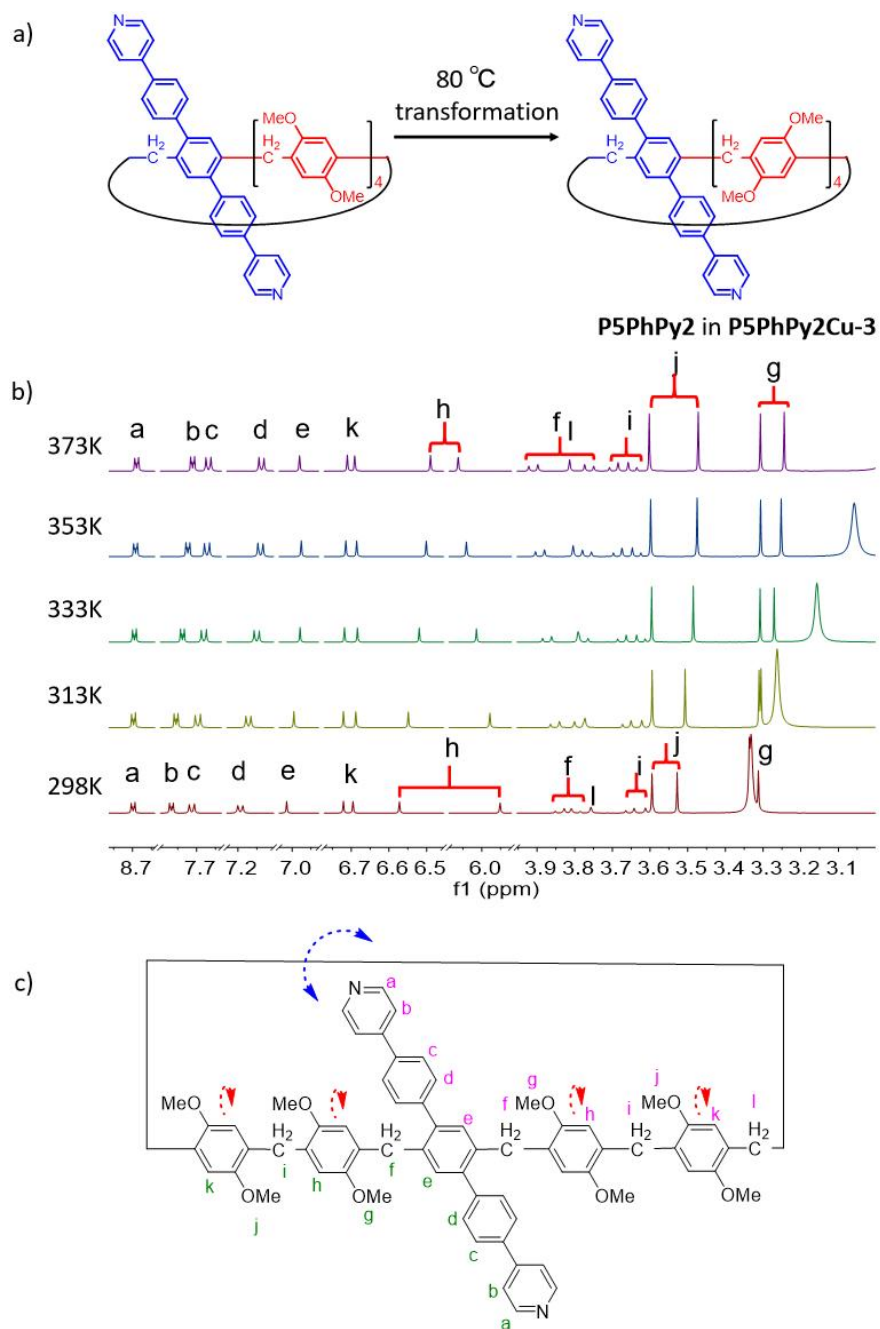

**Figure S20.** The transformation of **P5PhPy2** in crystal **P5PhPy2Cu-3** (a). The variable-temperature experiment of **P5PhPy2** in DMSO-D6 (600 MHz, from 298K to 373K) and the diagrammatic drawing of **P5PhPy2** (b-c).



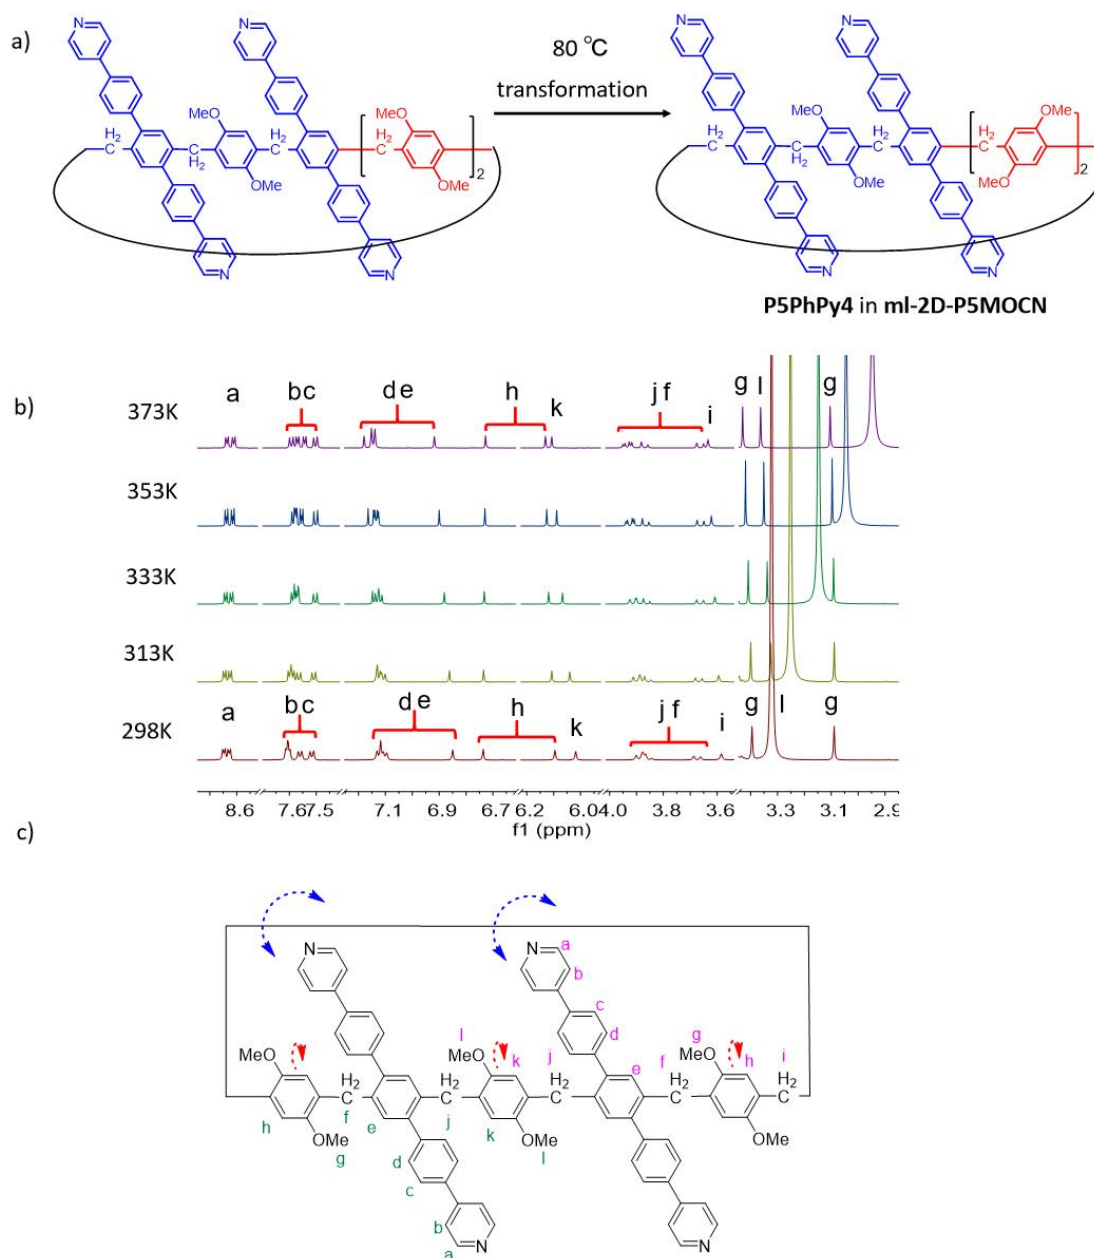

**Figure S21.** The transformation of **P5PhPy4** in crystal **ml-2D-P5MOCN** (a). The variable-temperature experiment of **P5PhPy4** in DMSO-D6 (600 MHz, from 298K to 373K) and the diagrammatic drawing of **P5PhPy4** (b-c).



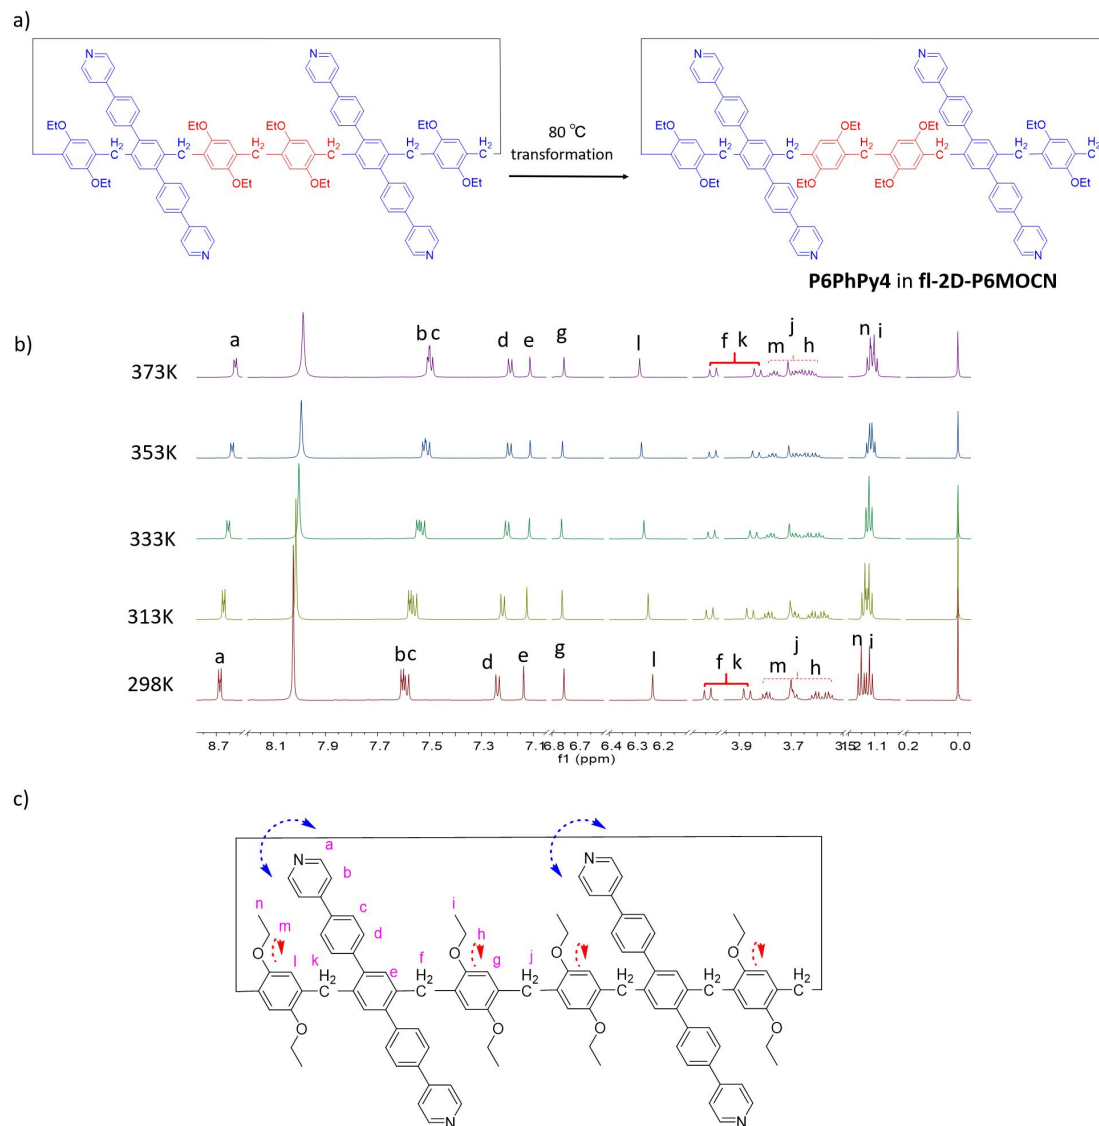

**Figure S22.** The transformation of **P6PhPy4** in crystal **fl-2D-P6MOCN** (a). The variable-temperature experiment of **P6PhPy4** in DMF-D7 (from 600 MHz, 298K to 373K) and the diagrammatic drawing of **P6PhPy4** (b-c).

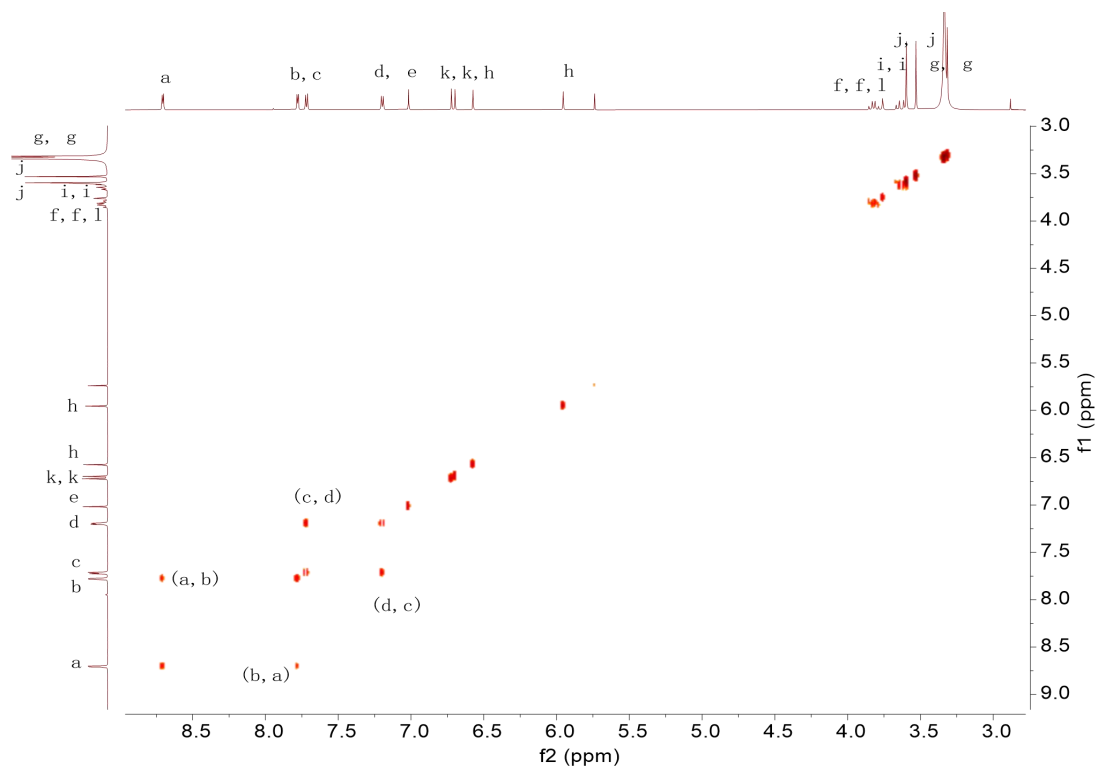

**Figure S23.** 2D  $^1\text{H}$ - $^1\text{H}$  COSY NMR spectrum (600 MHz, DMSO- $\text{D}_6$ , 298 K) of P5PhPy2.

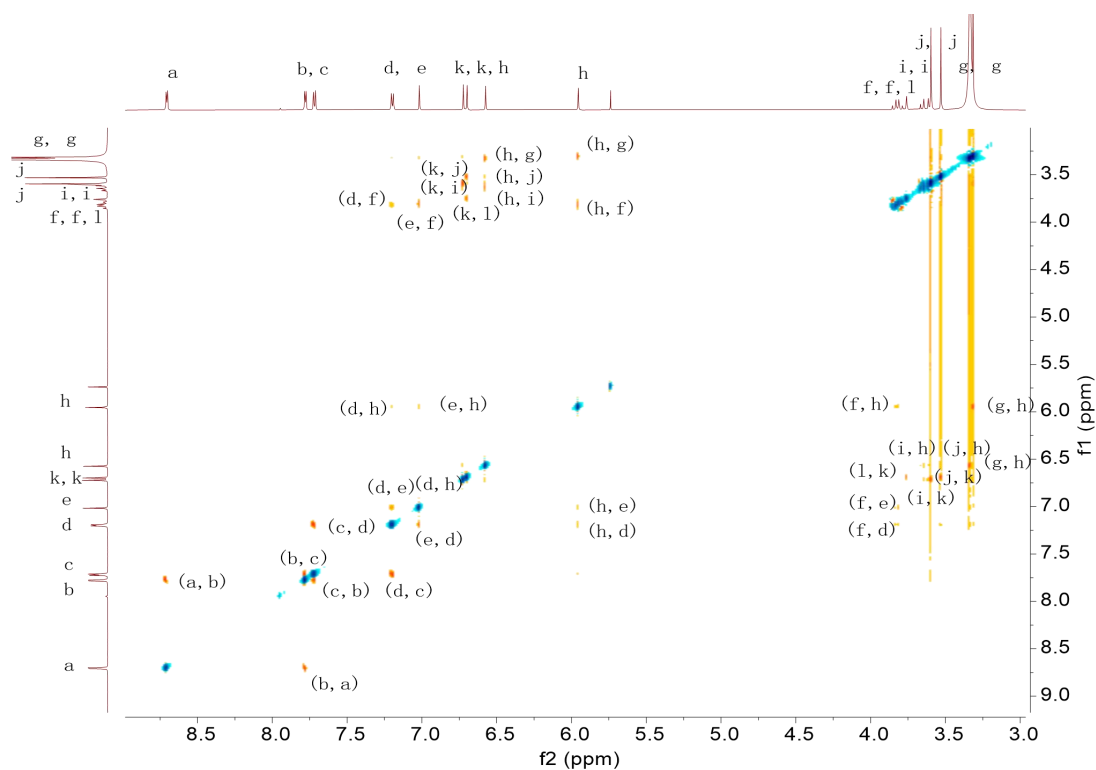

**Figure S24.** 2D  $^1\text{H}$ - $^1\text{H}$  NOESY NMR spectrum (600 MHz, DMSO- $\text{D}_6$ , 298 K) of P5PhPy2.

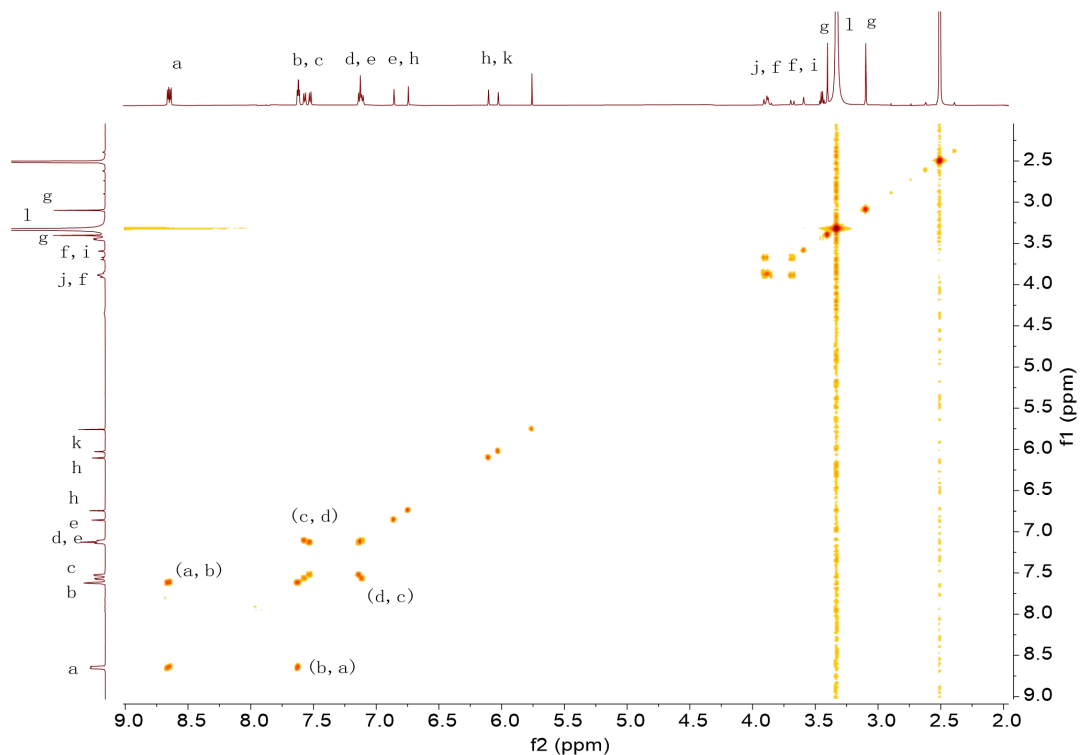

**Figure S25.** 2D  $^1\text{H}$ - $^1\text{H}$  COSY NMR spectrum (600 MHz, DMSO- $\text{D}_6$ , 298 K) of **P5PhPy4**.

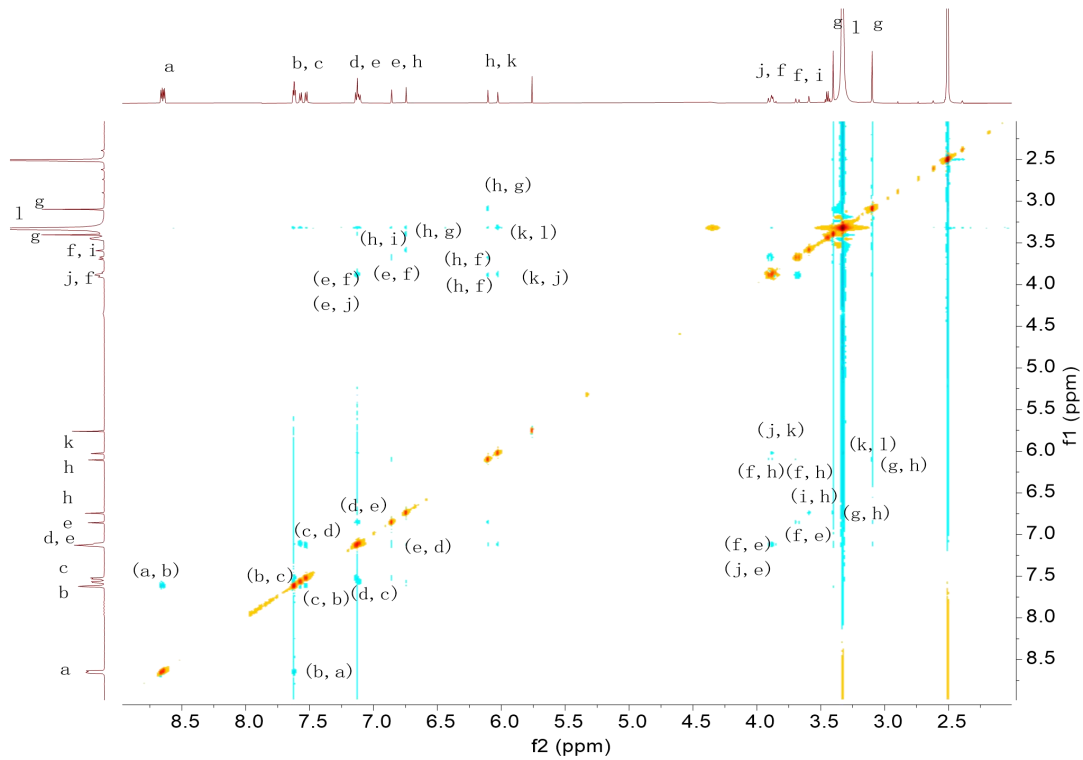

**Figure S26.** 2D  $^1\text{H}$ - $^1\text{H}$  COSY NMR spectrum (600 MHz, DMSO- $\text{D}_6$ , 298 K) of **P5PhPy4**.

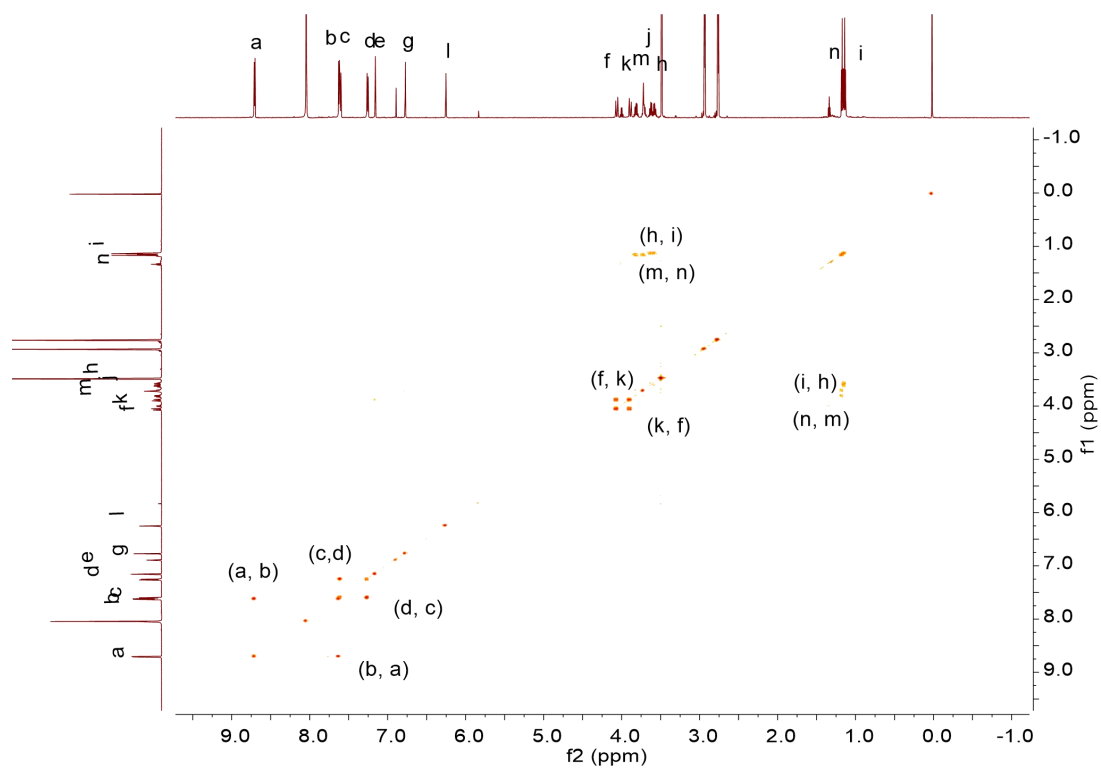

**Figure S27.** 2D  $^1\text{H}$ - $^1\text{H}$  COSY NMR spectrum (600 MHz, DMF-D7, 298 K) of P6PhPy4.

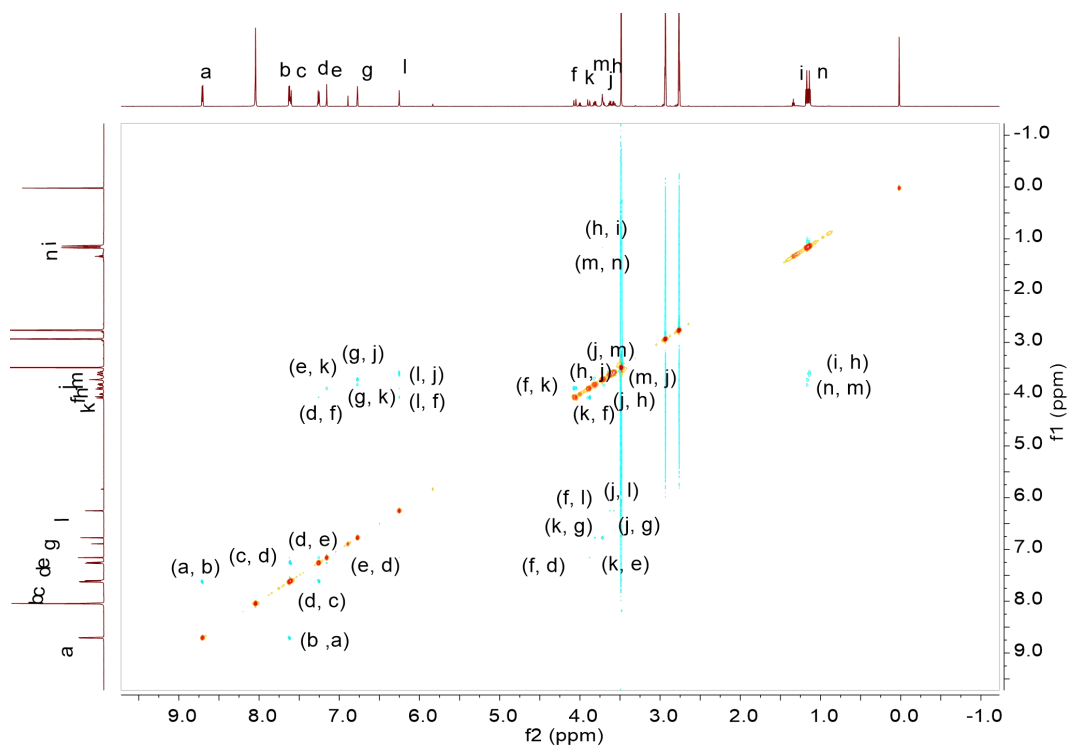

**Figure S28.** 2D  $^1\text{H}$ - $^1\text{H}$  COSY NMR spectrum (600 MHz, DMF-D7, 298 K) of P6PhPy4.

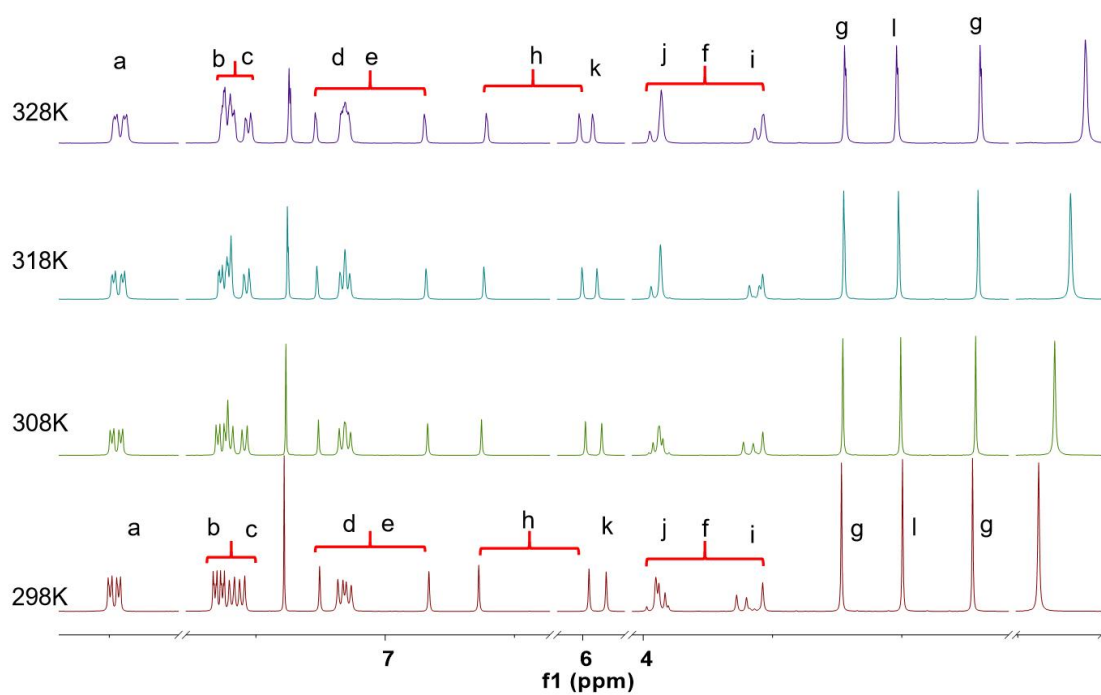

**Figure S29.**  $^1\text{H}$  NMR variable-temperature experiments for **P5PhPy4** in  $\text{CDCl}_3$  (600 MHz 298K to 328K).

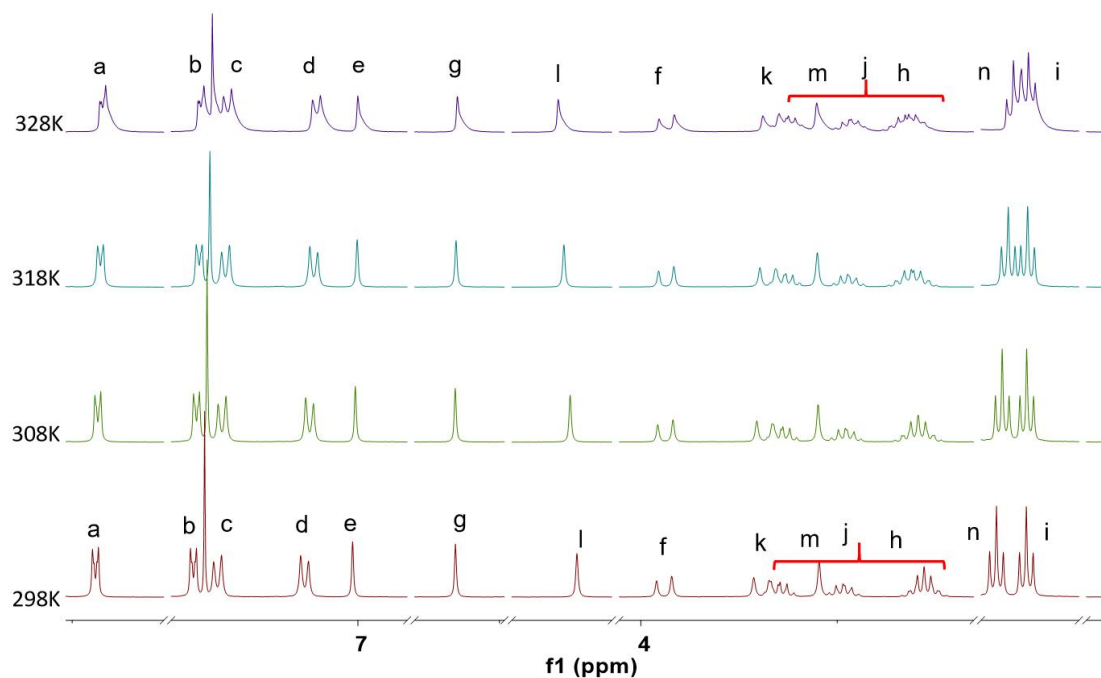

**Figure S30.**  $^1\text{H}$  NMR variable-temperature experiments for **P6PhPy4** in  $\text{CDCl}_3$  (600 MHz 298K to 328K).

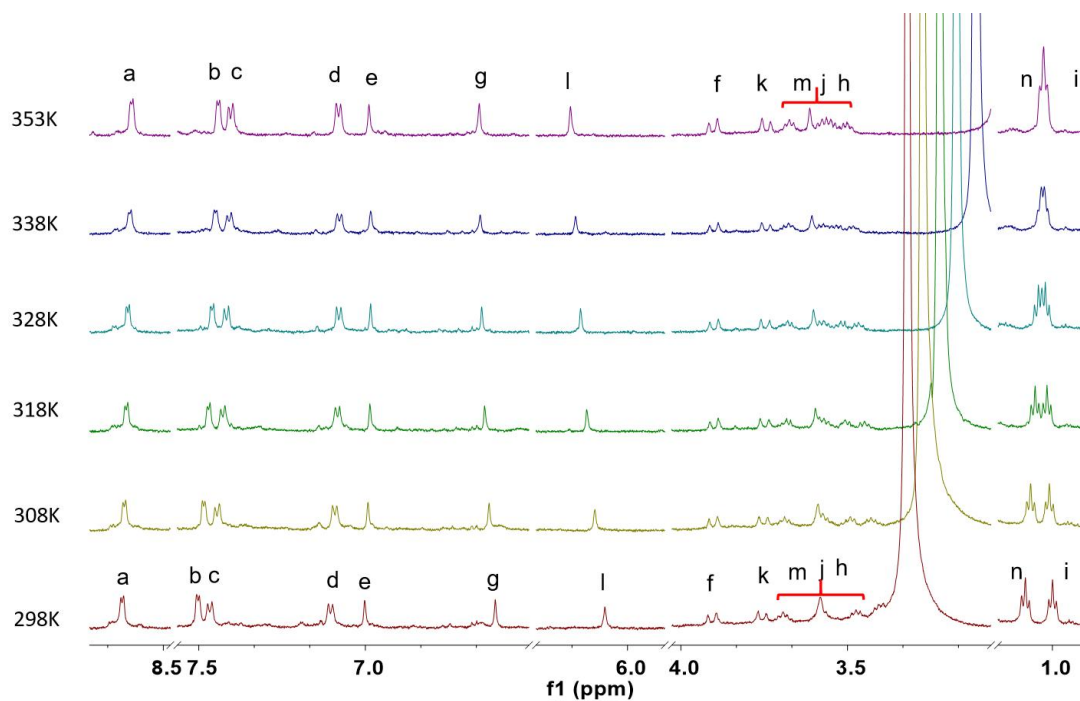

**Figure S31.**  $^1\text{H}$  NMR variable-temperature experiments for **P6PhPy4** in  $\text{DMSO-d}_6$  (600 MHz 298K to 353K).

adiponitrile@P6PhPy4

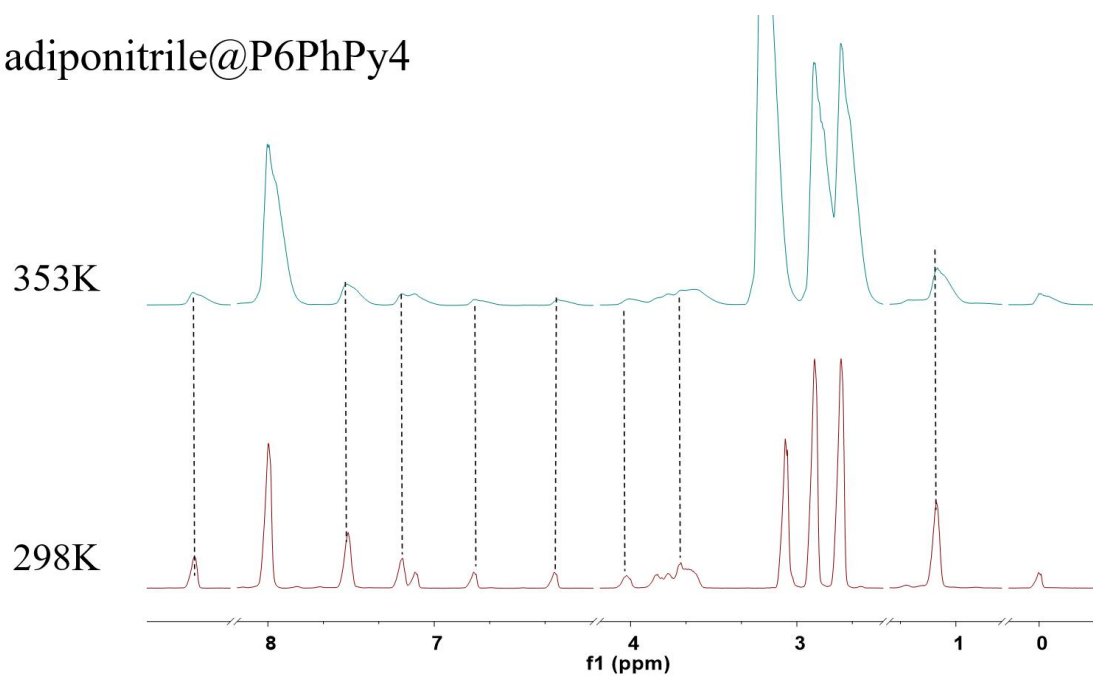

**Figure S32.**  $^1\text{H}$  NMR experiments for adiponitrile@**P6PhPy4** in  $\text{DMF-d}_7$  (600 MHz) at room temperature and 80 °C.

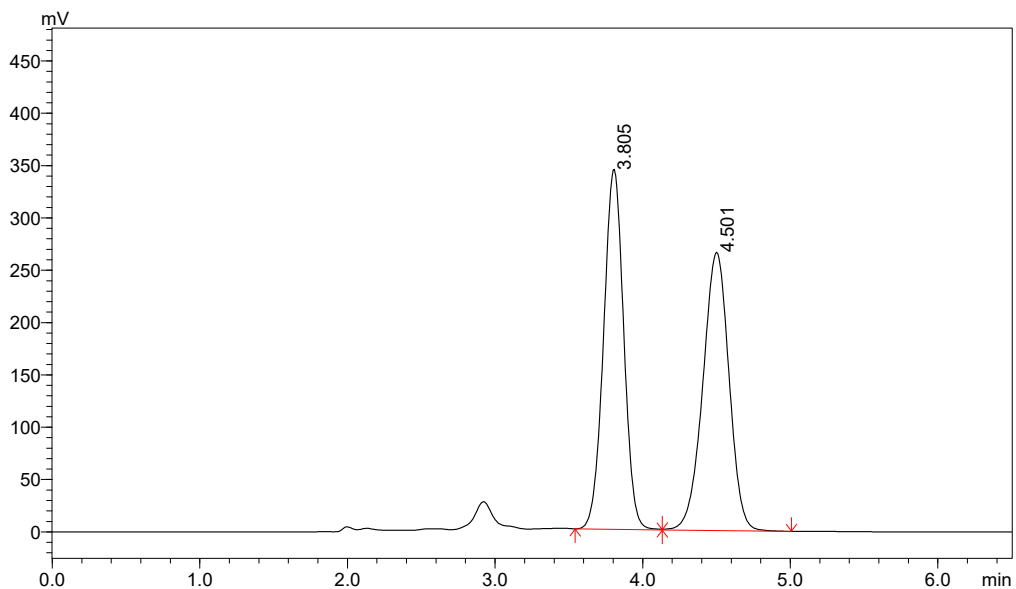

| Peak# | Ret. Time | Area    | Area%  | T.Plate# | Tailing F. | Resolution |
|-------|-----------|---------|--------|----------|------------|------------|
| 1     | 3.805     | 3260218 | 49.902 | 0.992    | 3460       | 43.347     |
| 2     | 4.501     | 3273010 | 50.098 | 0.954    | 2965       | 50.599     |

**Figure S33.** Resolution of the enantiomers of **P6PhPy4** by chiral HPLC.

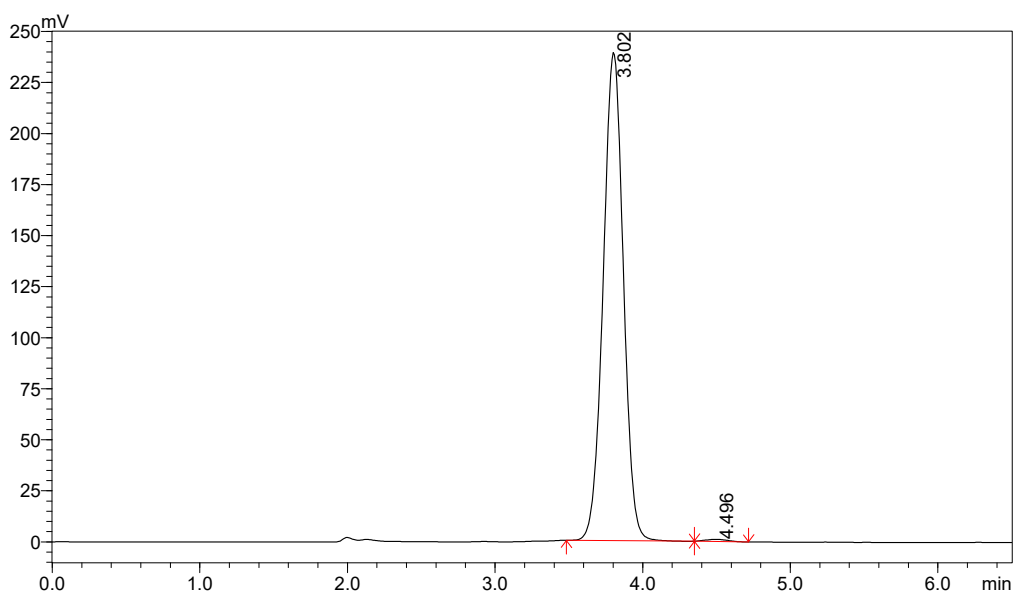

| Peak# | Ret. Time | Area    | Area%  | T.Plate# | Tailing F. | Resolution |
|-------|-----------|---------|--------|----------|------------|------------|
| 1     | 3.802     | 2266560 | 99.544 | 0.994    | 3465       | 43.290     |
| 2     | 4.496     | 10386   | 0.456  | 1.073    | 4003       | 37.476     |

**Figure S34.** Chromatograms of resolved **pS-P6**, confirmed by single crystal analysis.

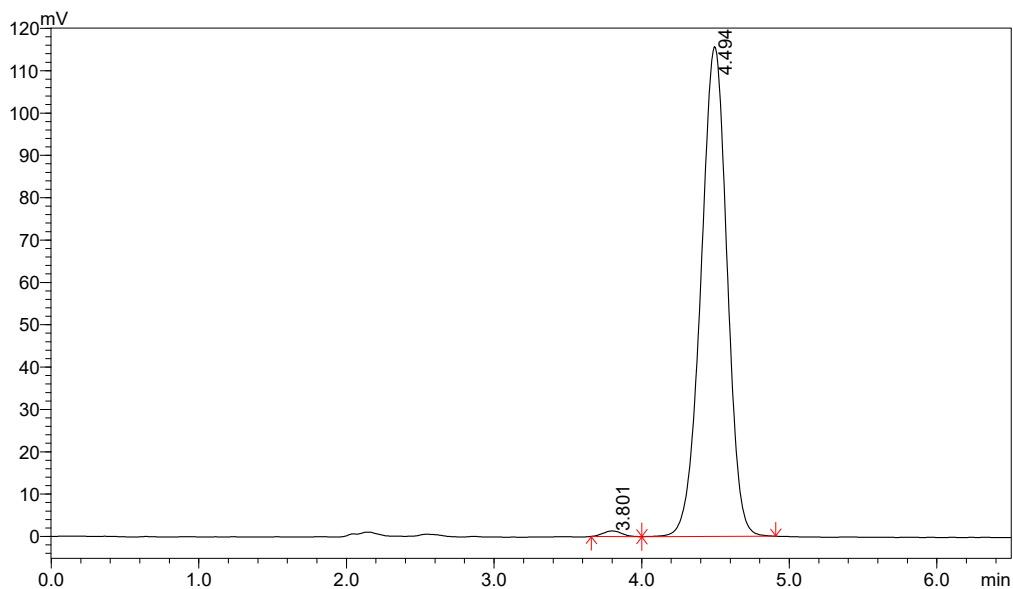

| Peak# | Ret. Time | Area    | Area%  | T.Plate# | Tailing F. | Resolution |
|-------|-----------|---------|--------|----------|------------|------------|
| 1     | 3.801     | 11409   | 0.796  | 1.043    | 3888       | 38.576     |
| 2     | 4.494     | 1422802 | 99.204 | 0.953    | 2959       | 50.689     |

**Figure S35.** Chromatograms of resolved *pR-P6*, confirmed by single crystal analysis.

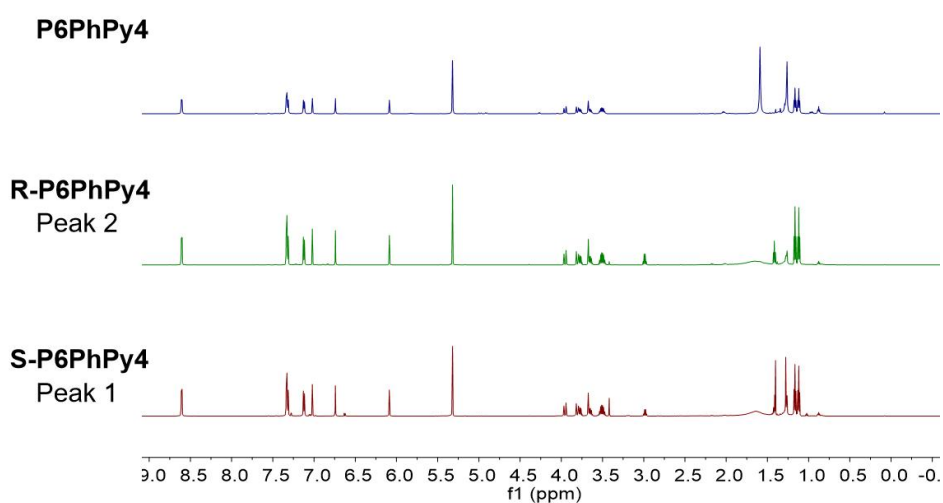

**Figure S36.** <sup>1</sup>H NMR spectrum (600 MHz) of compound **P6PhPy4** (blue line), **S-P6PhPy4** (red line) and **R-P6PhPy4** (green line) in CD<sub>2</sub>Cl<sub>2</sub>.



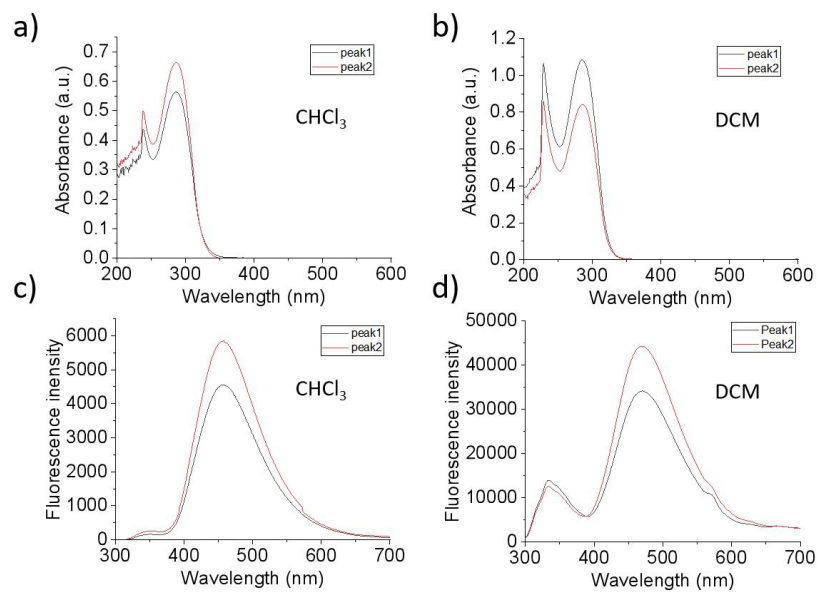

**Figure S37.** UV-vis spectra of *S*-P6PhPy4 (black line) and *R*-P6PhPy4 (red line) in  $\text{CHCl}_3$  (a) and DCM (b), and fluorescence spectra of *S*-P6PhPy4 (black line) and *R*-P6PhPy4 (red line) in  $\text{CHCl}_3$  (c) and DCM (d).

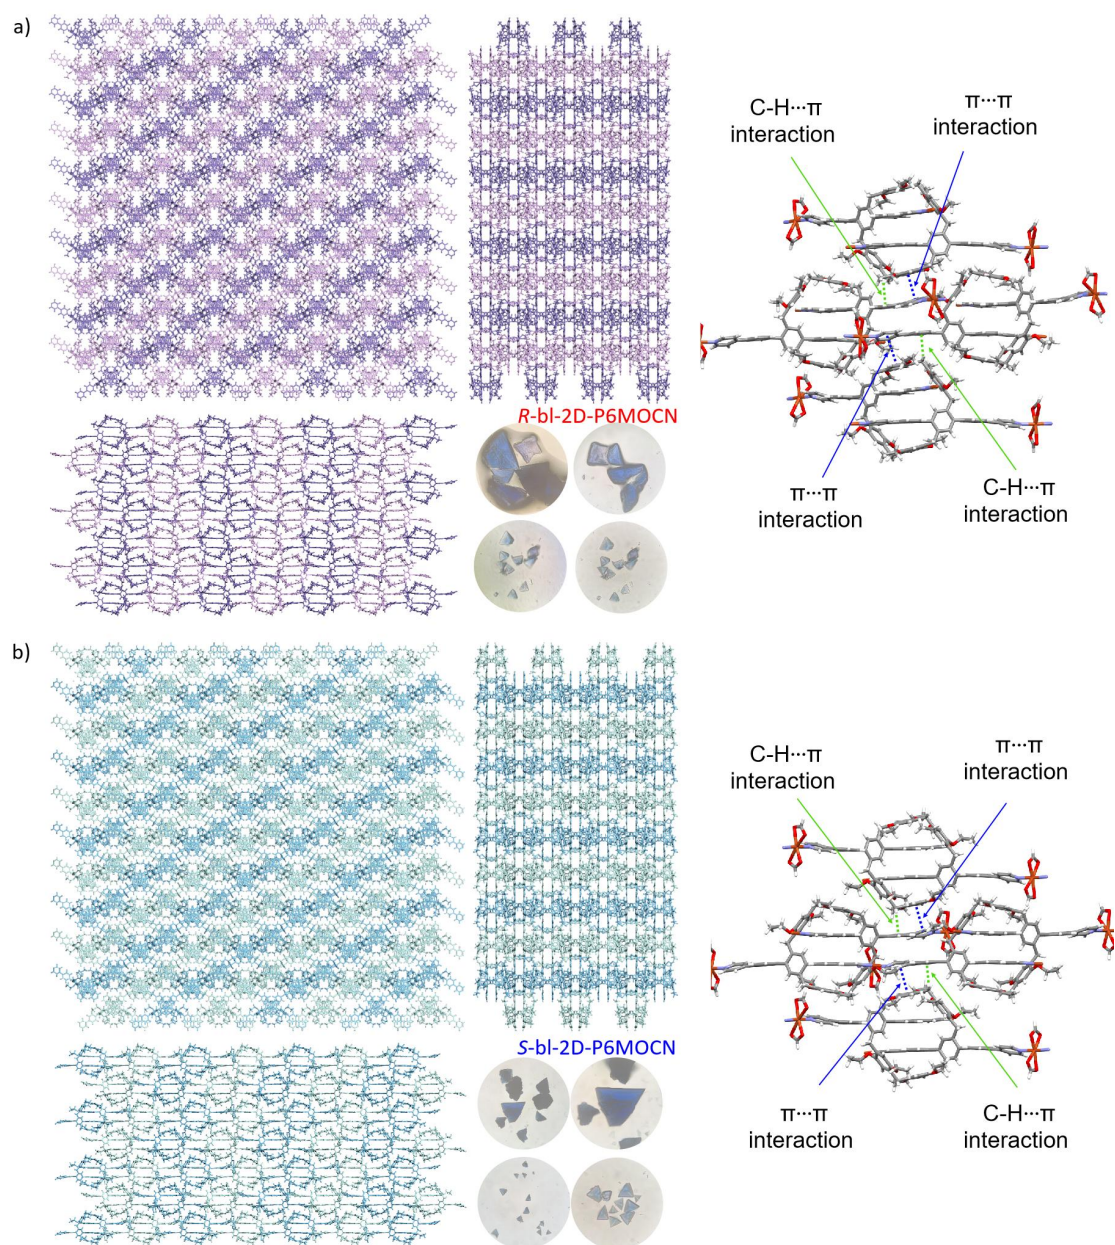

**Figure S38.** Microscope images of *R*-bi-2D-P6MOCN and the top and side view of the crystal structure *R*-bi-2D-P6MOCN (a) and microscope images of *S*-bi-2D-P6MOCN and the top and side view of the crystal structure *S*-bi-2D-P6MOCN (b) .

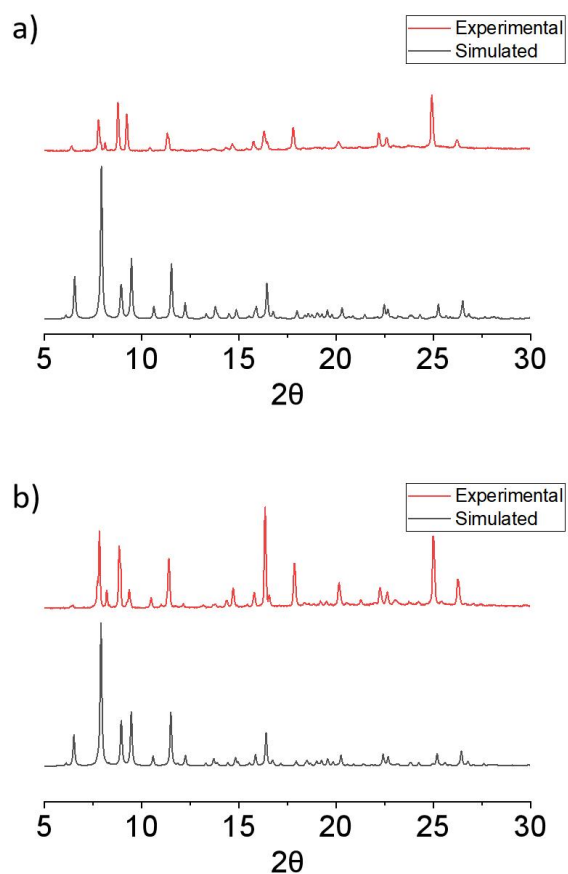

**Figure S39.** Experimental (red) and simulated (black) PXRD patterns of *S-bl-2D-P6MOCN* (a) and *R-bl-2D-P6MOCN* (b).

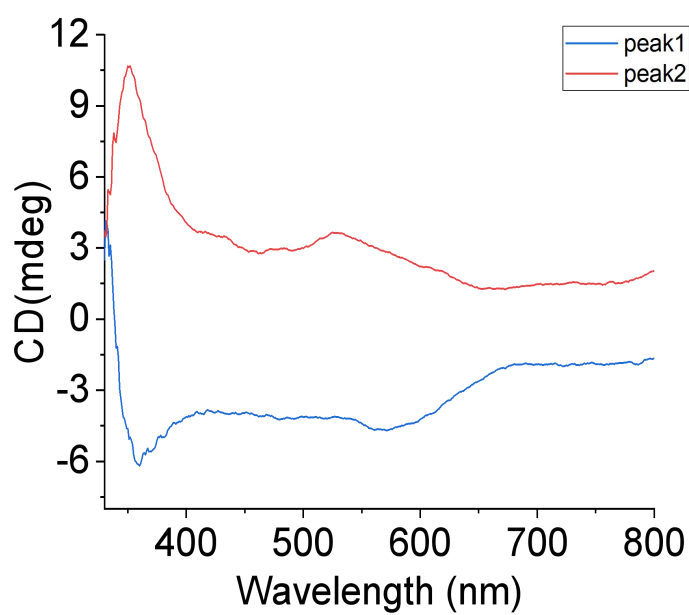

**Figure S40.** CD spectra of *S-bl-2D-P6MOCN* (blue line) and *R-bl-2D-P6MOCN* (red line) in solid state.

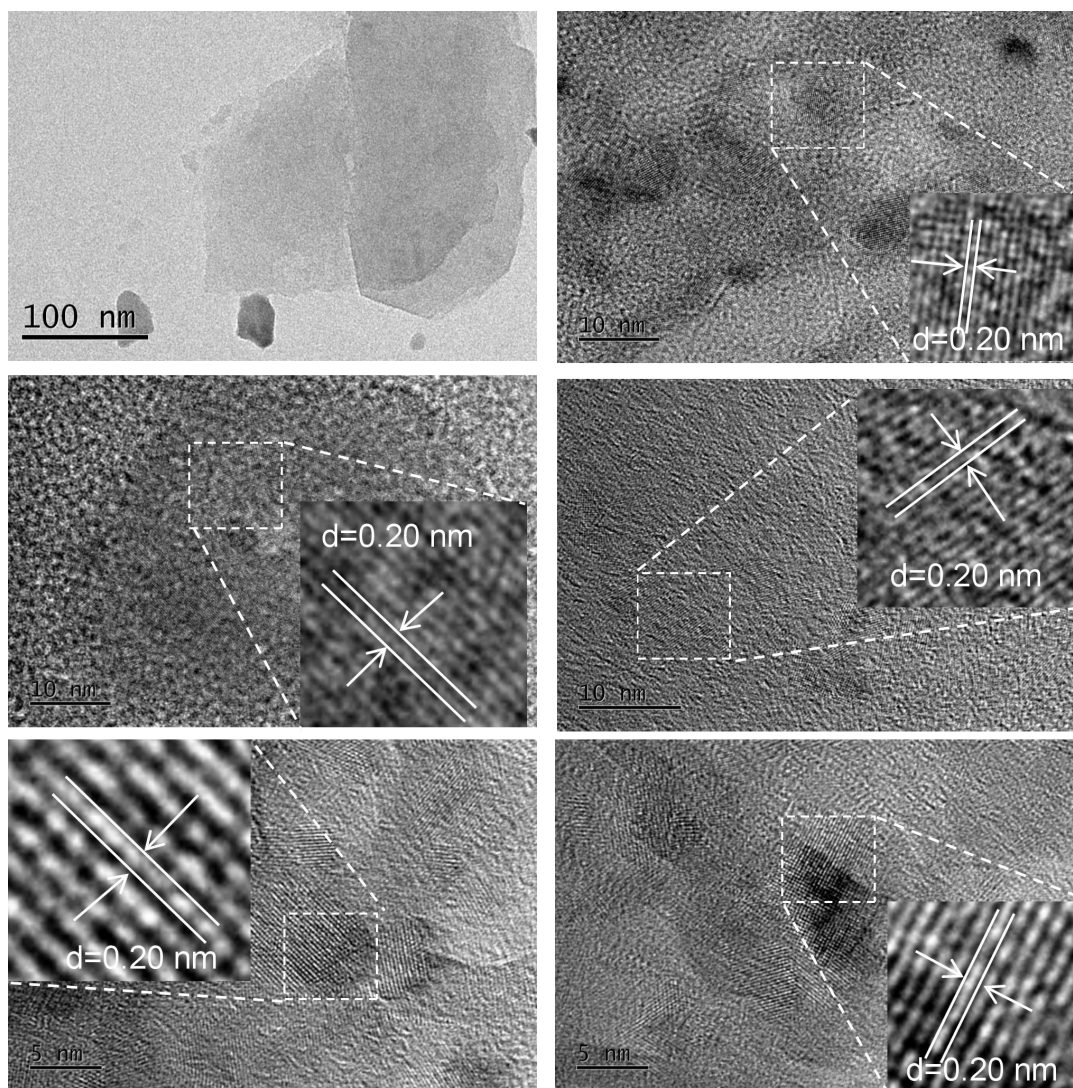

**Figure S41.** TEM images of ml-2D-P5MOCN.



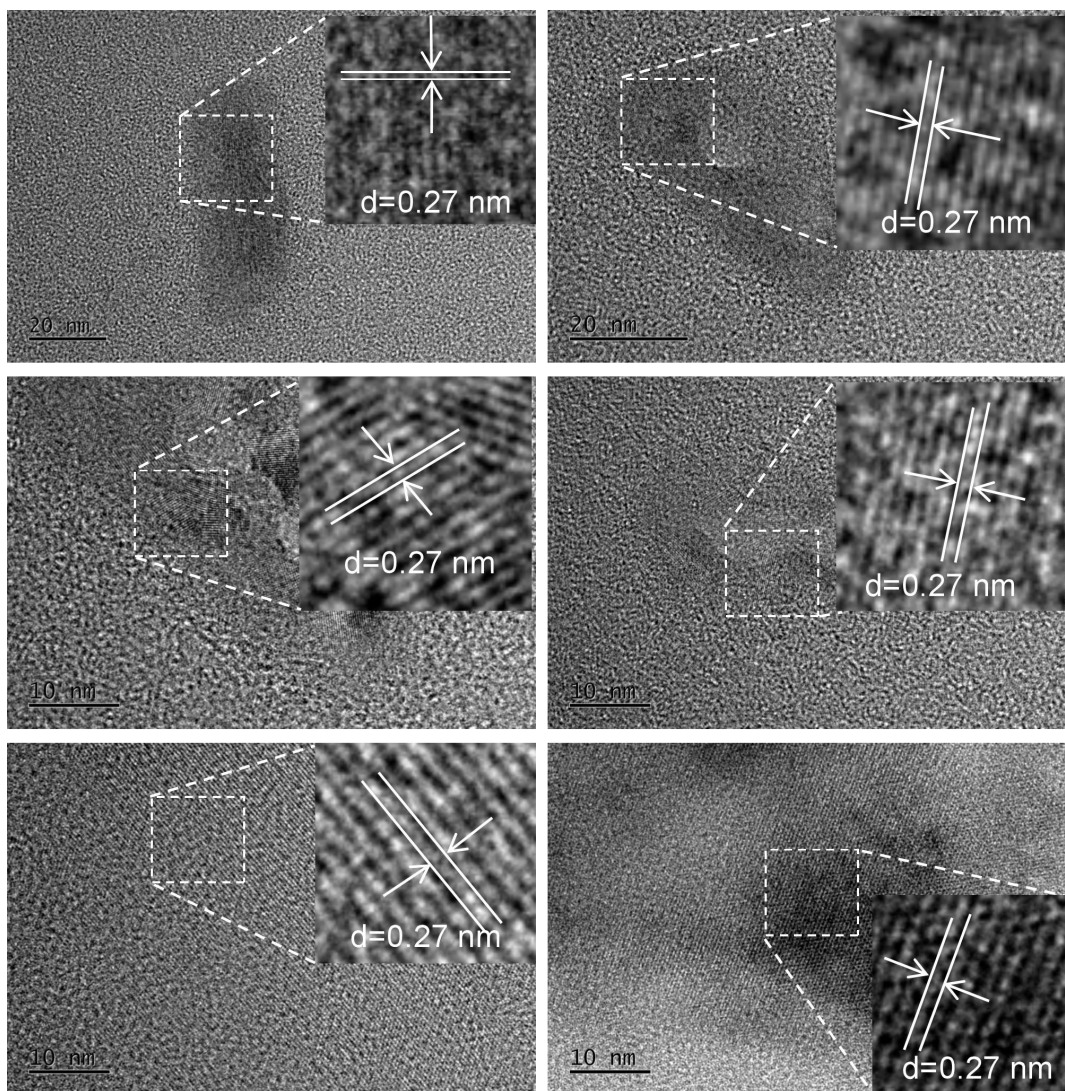

**Figure S42.** TEM images of **bl-2D-P5MOCN**.

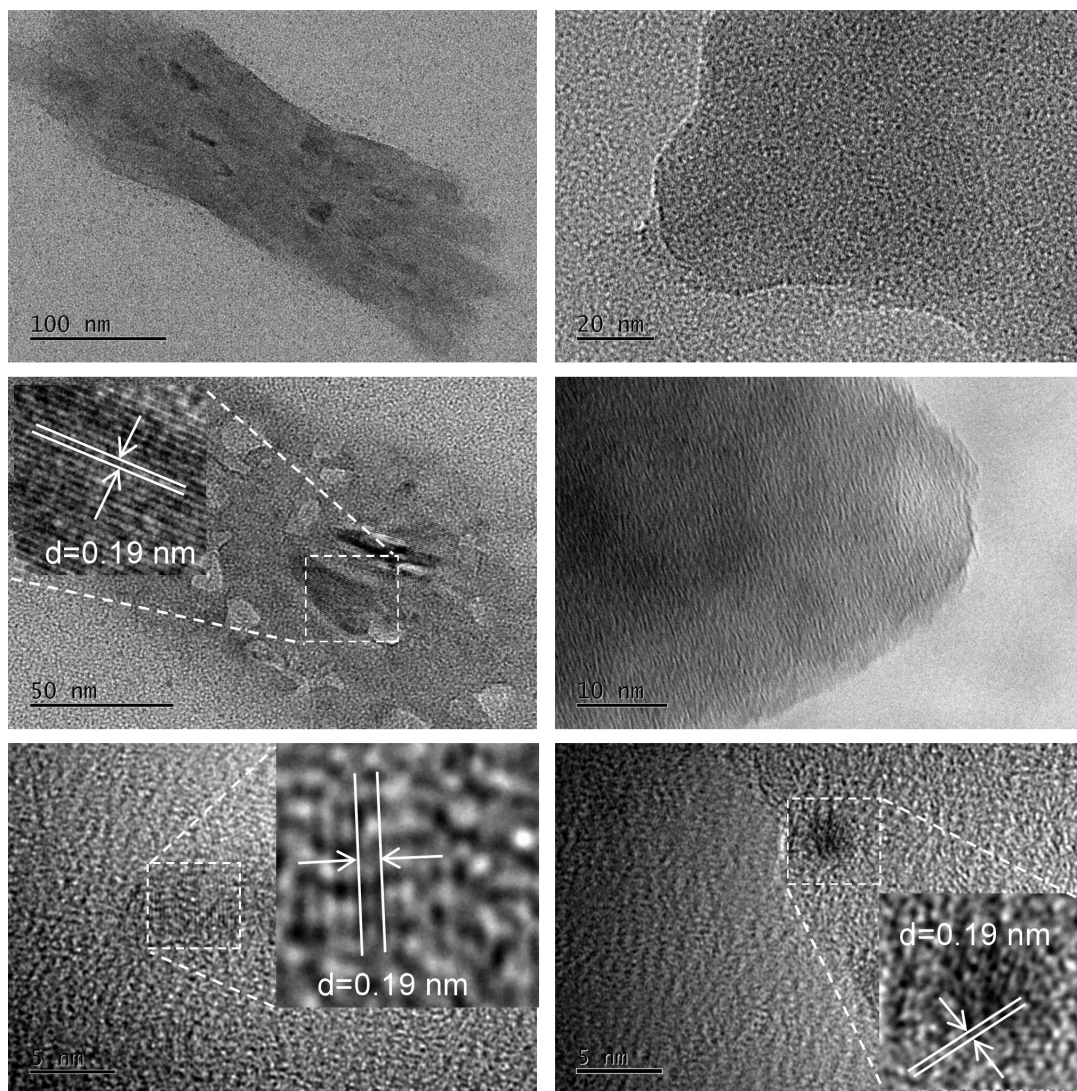

**Figure S43.** TEM images of bl-2D-P6MOCN.

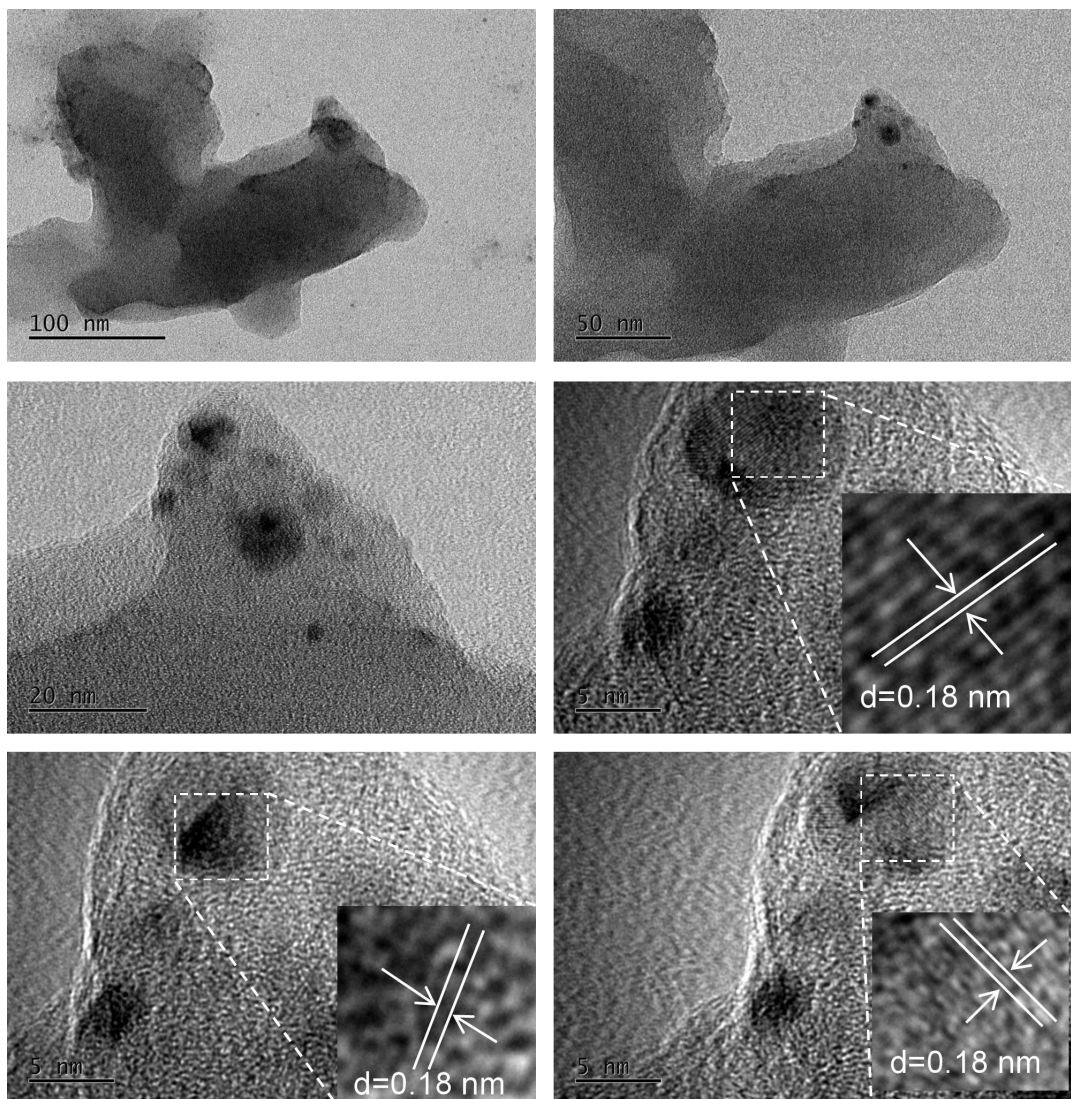

**Figure S44.** TEM images of sb1-2D-P6MOCN.

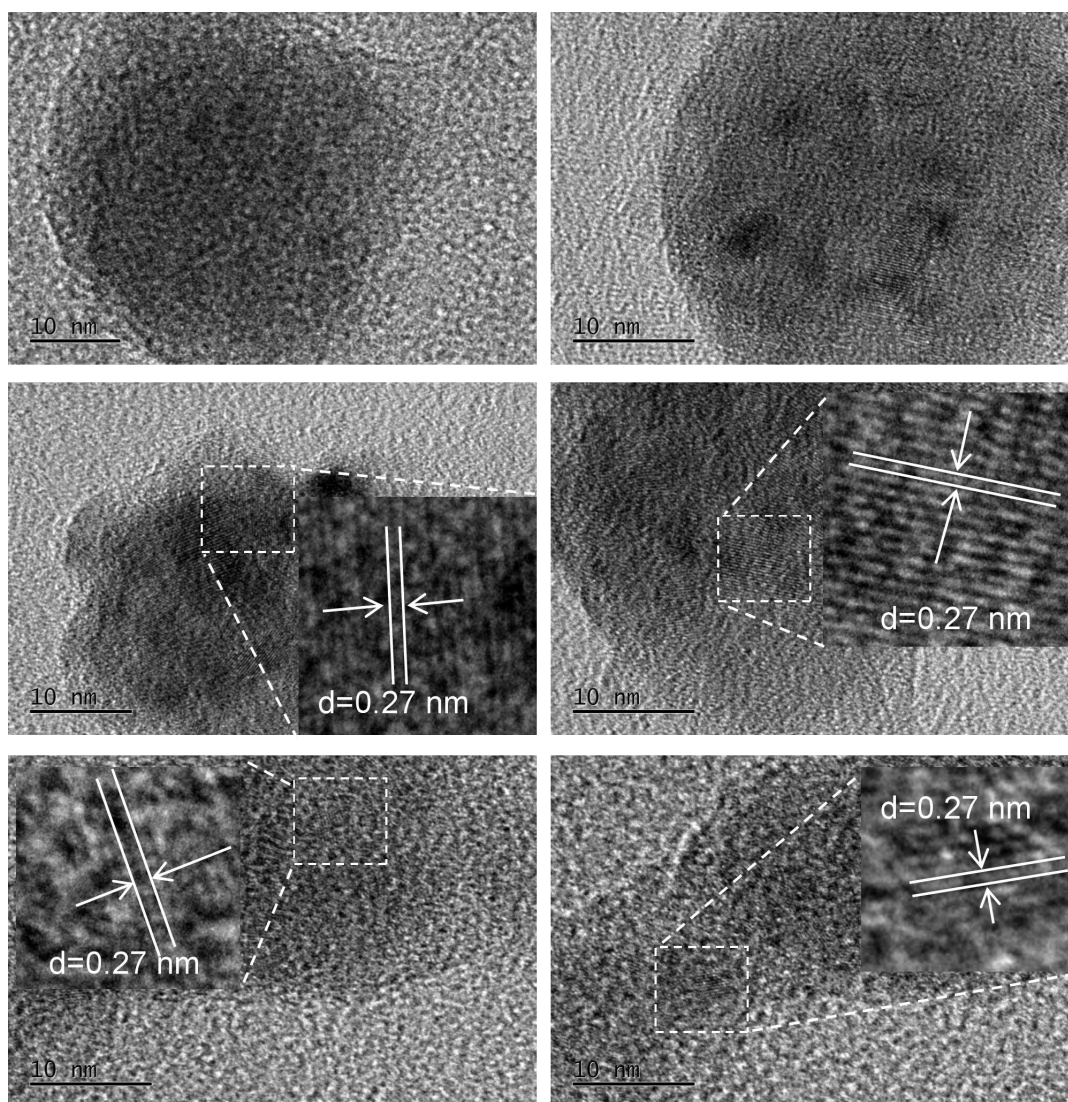

**Figure S45.** TEM images of **fl-2D-P6MOCN**.



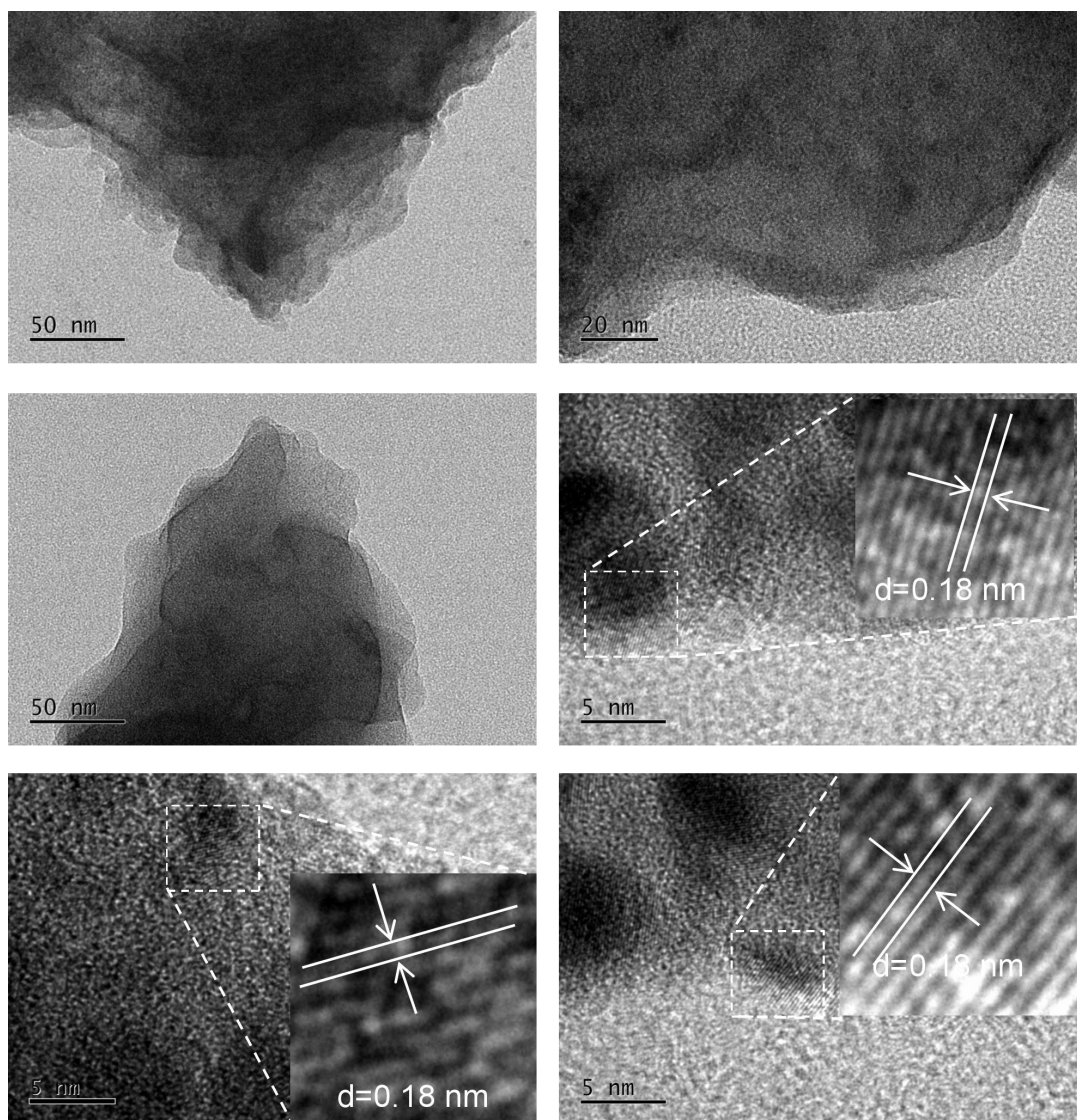

**Figure S46.** TEM images of **mtl-2D-P6MOCN**.

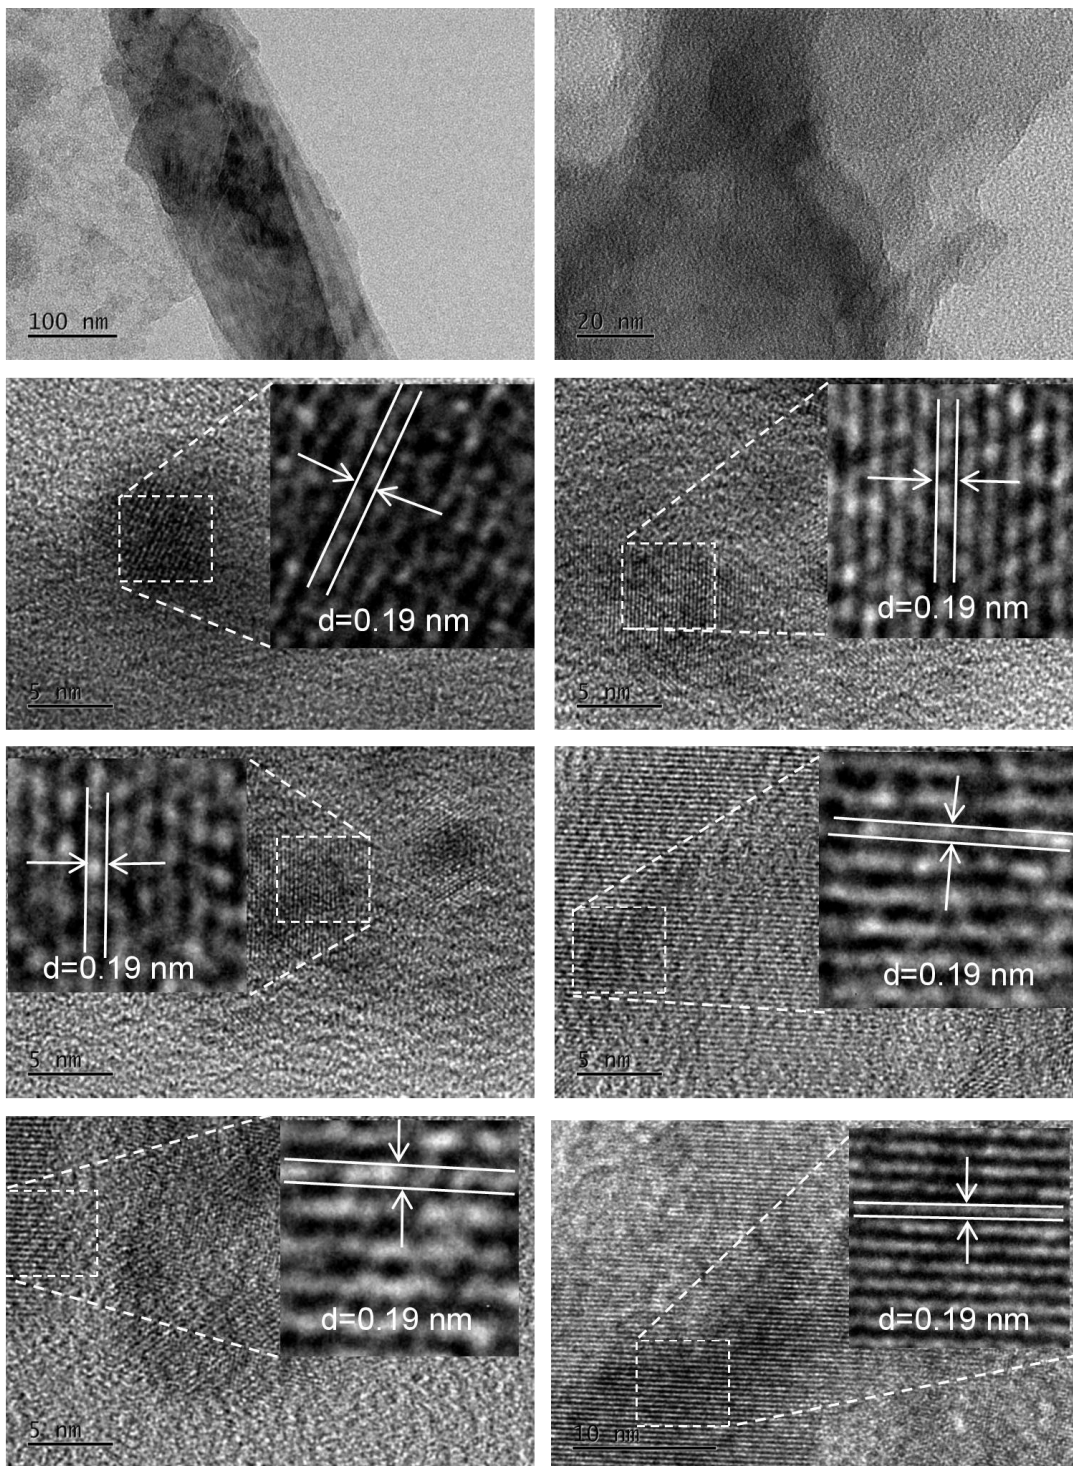

**Figure S47.** TEM images of R-bl-2D-P6MOCN.

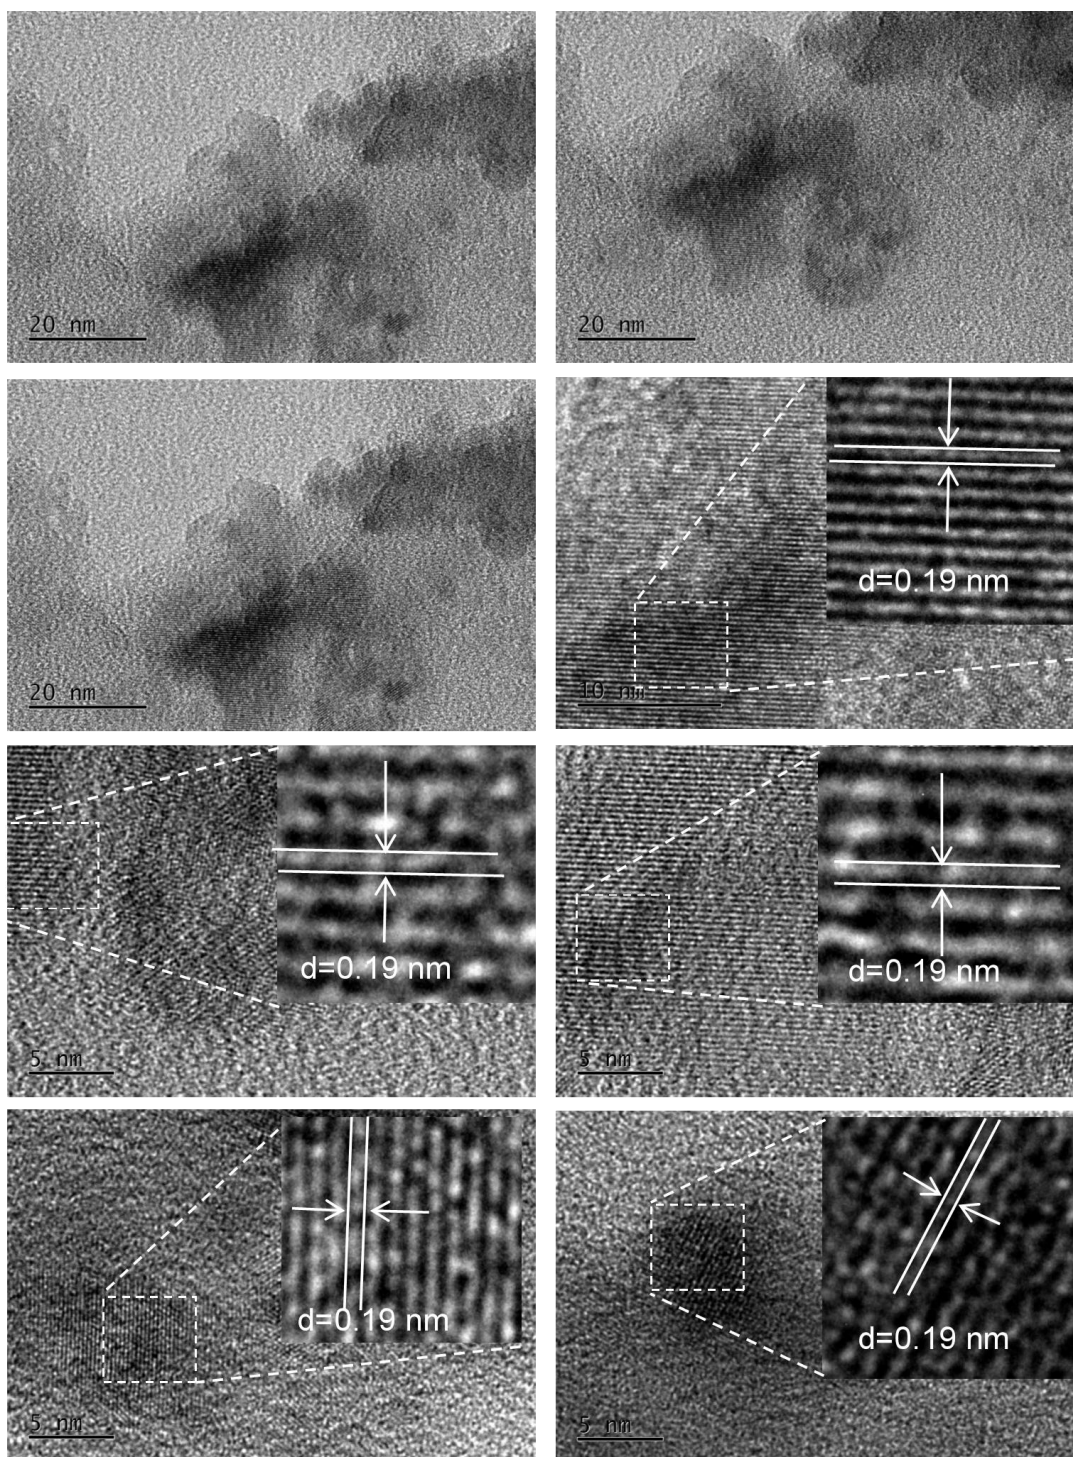

**Figure S48.** TEM images of S-bl-2D-P6MOCN.

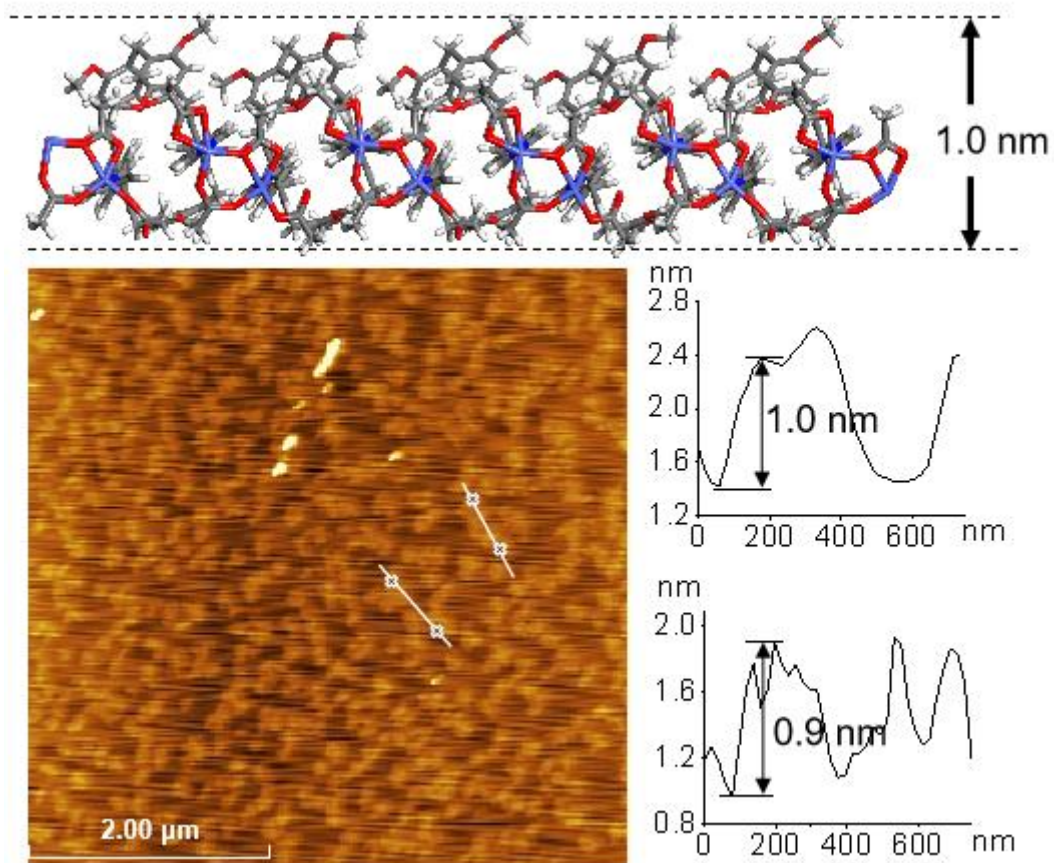

**Figure S49.** AFM images of ml-2D-P5MOCN.



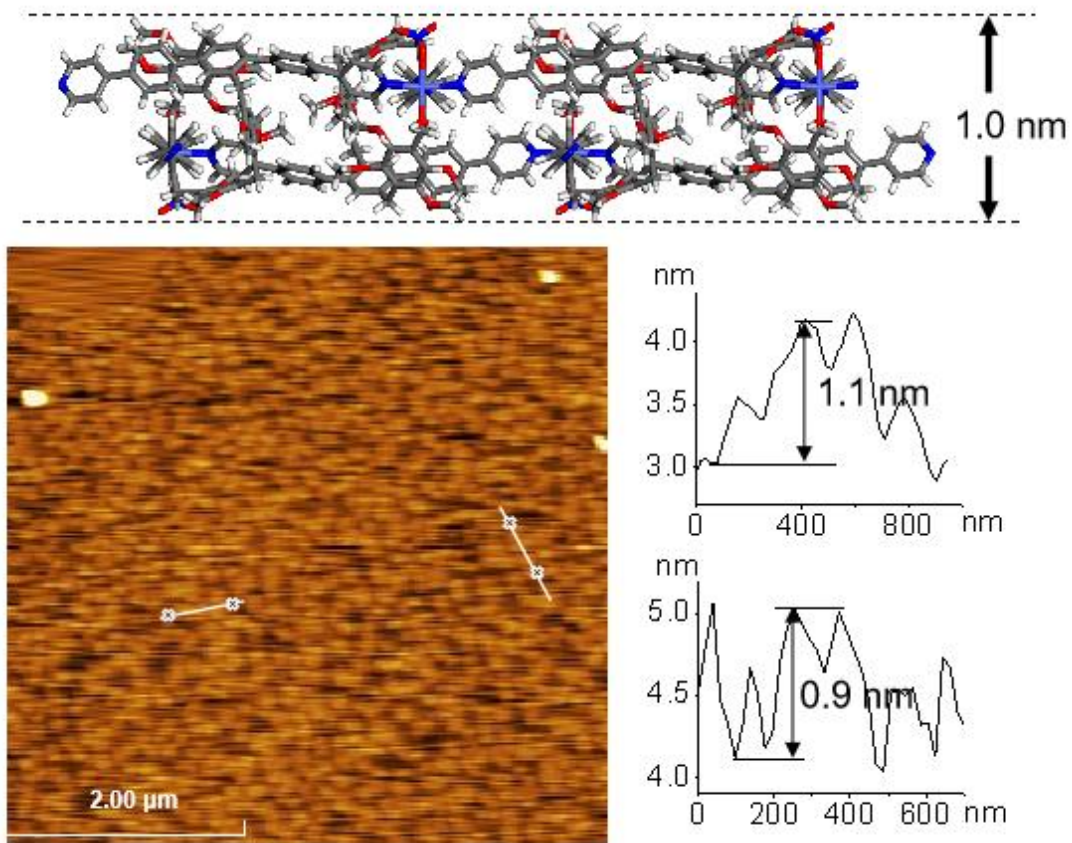

**Figure S50.** AFM images of bl-2D-P5MOCN.

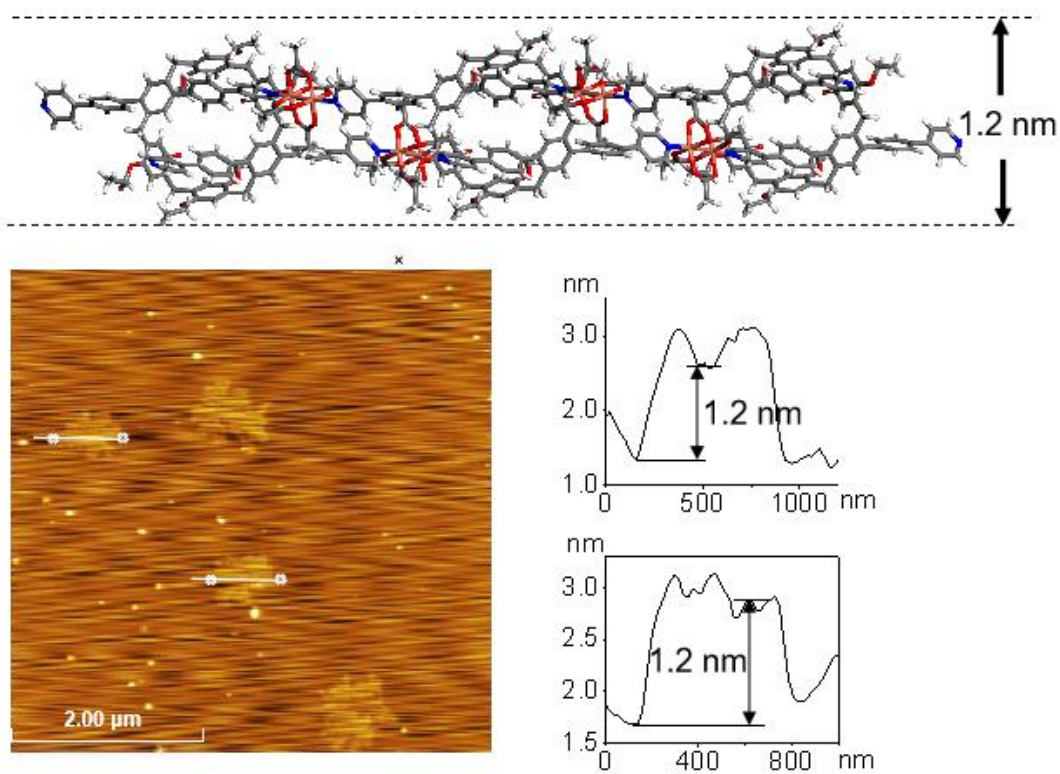

**Figure S51.** AFM images of bl-2D-P6MOCN.

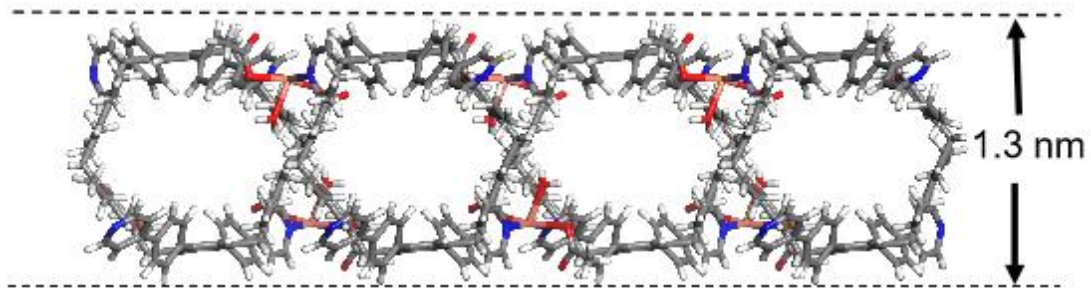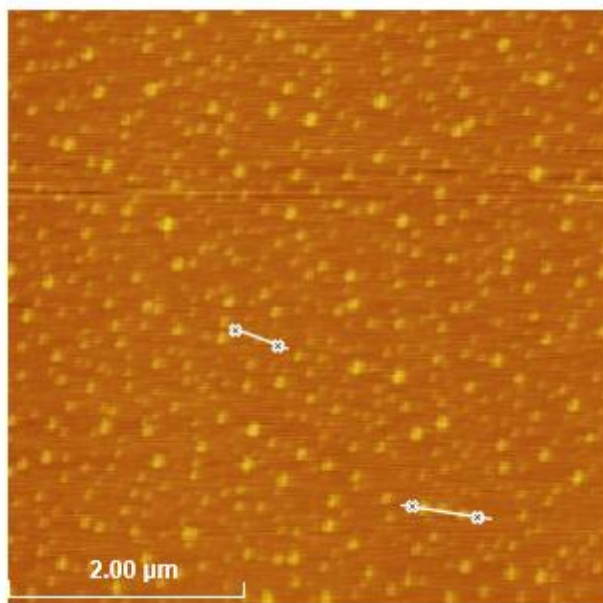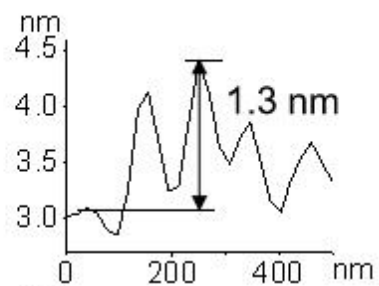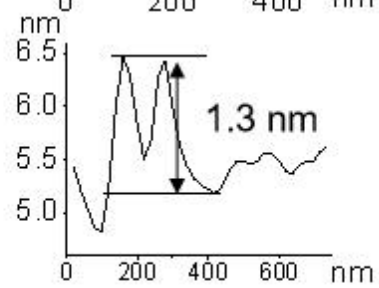

**Figure S52.** AFM images of sbI-2D-P6MOCN.

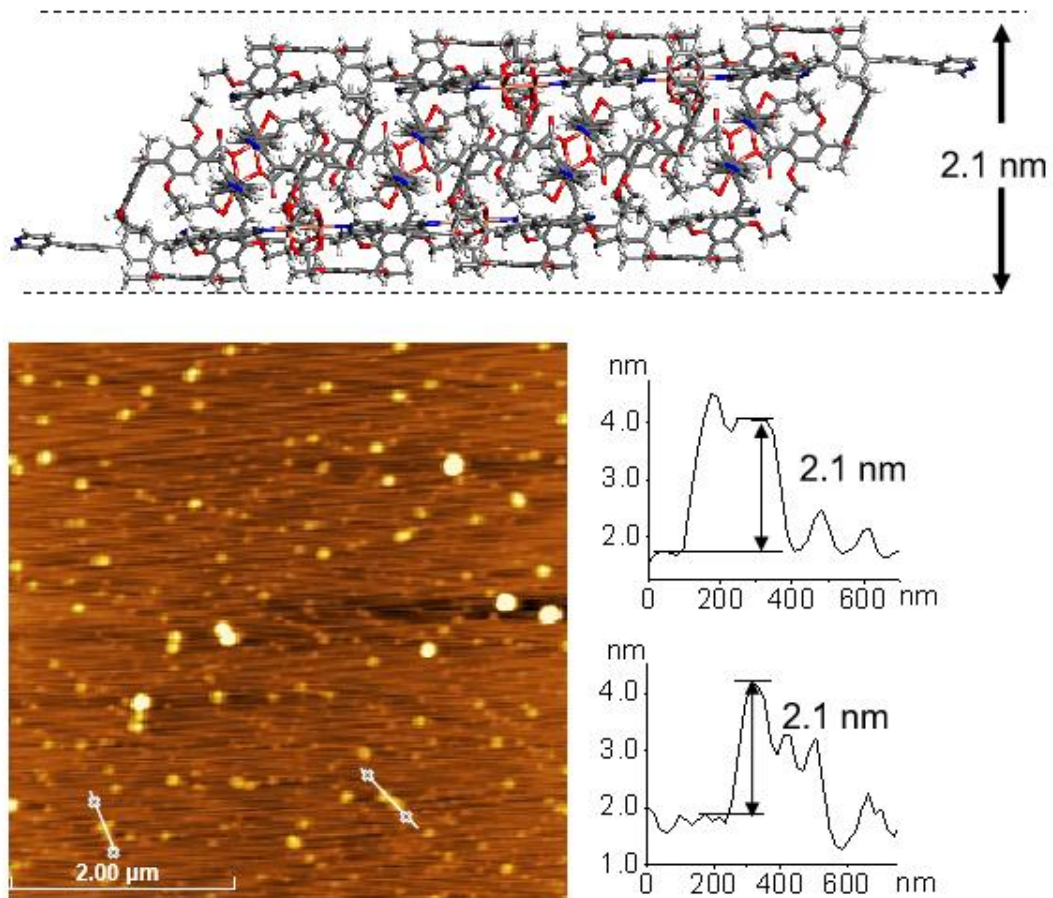

**Figure S53.** AFM images of fl-2D-P6MOCN.

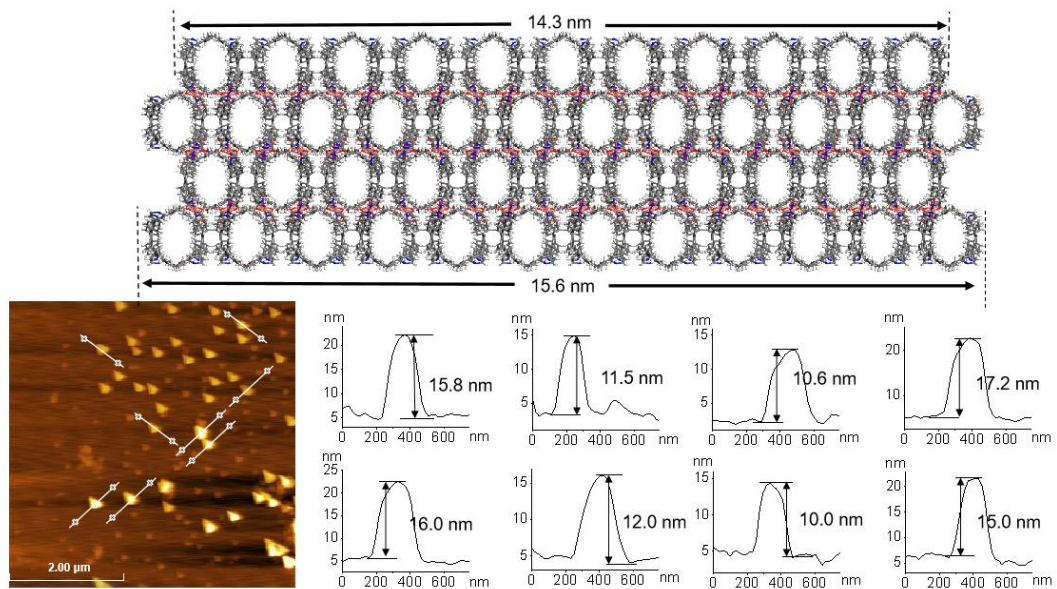

**Figure S54.** AFM images of mtl-2D-P6MOCN.



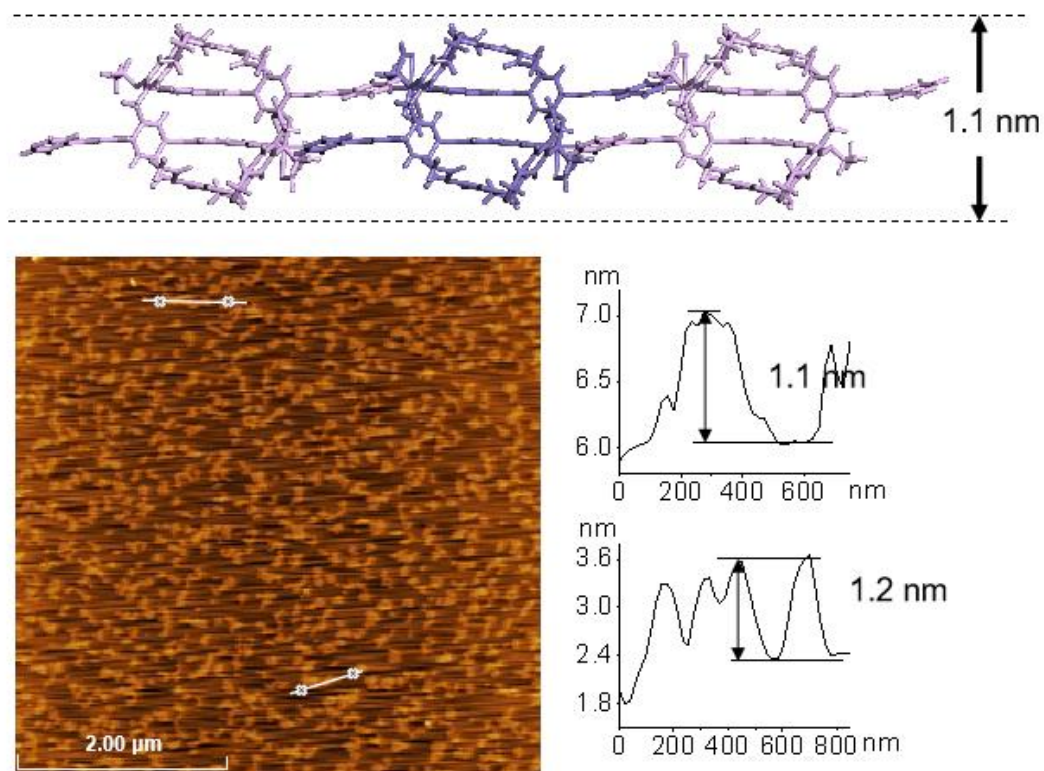

**Figure S55.** AFM images of R-bl-2D-P6MOCN.

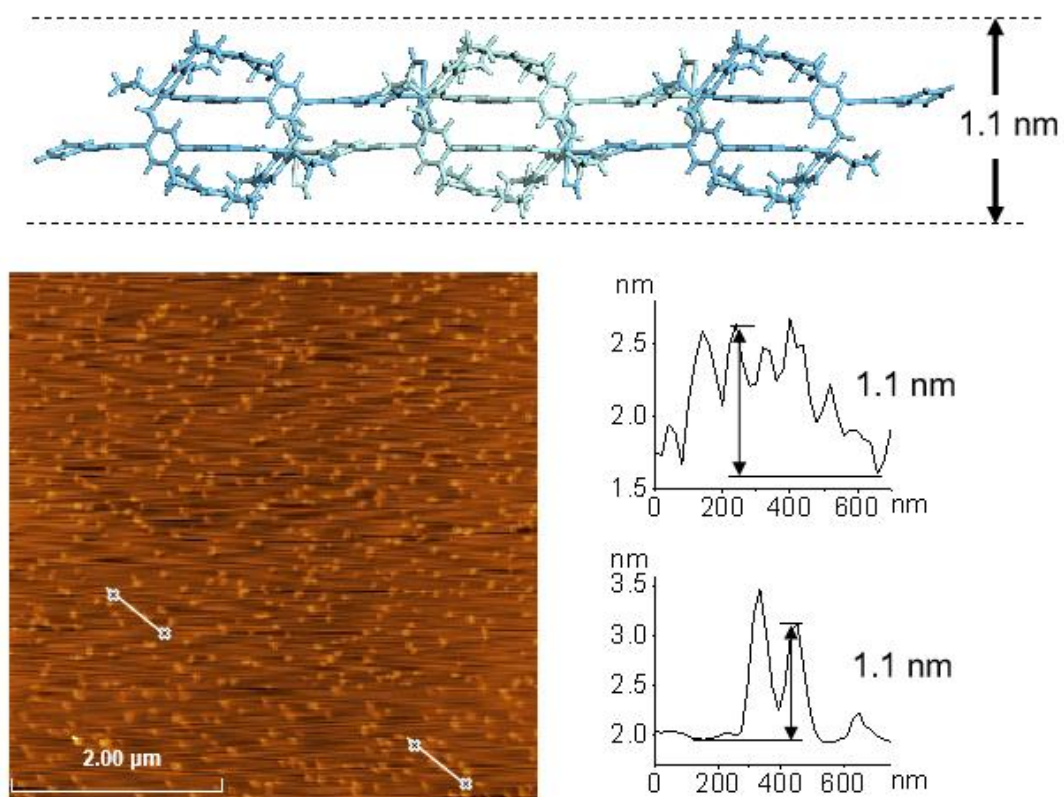

**Figure S56.** AFM images of S-bl-2D-P6MOCN.



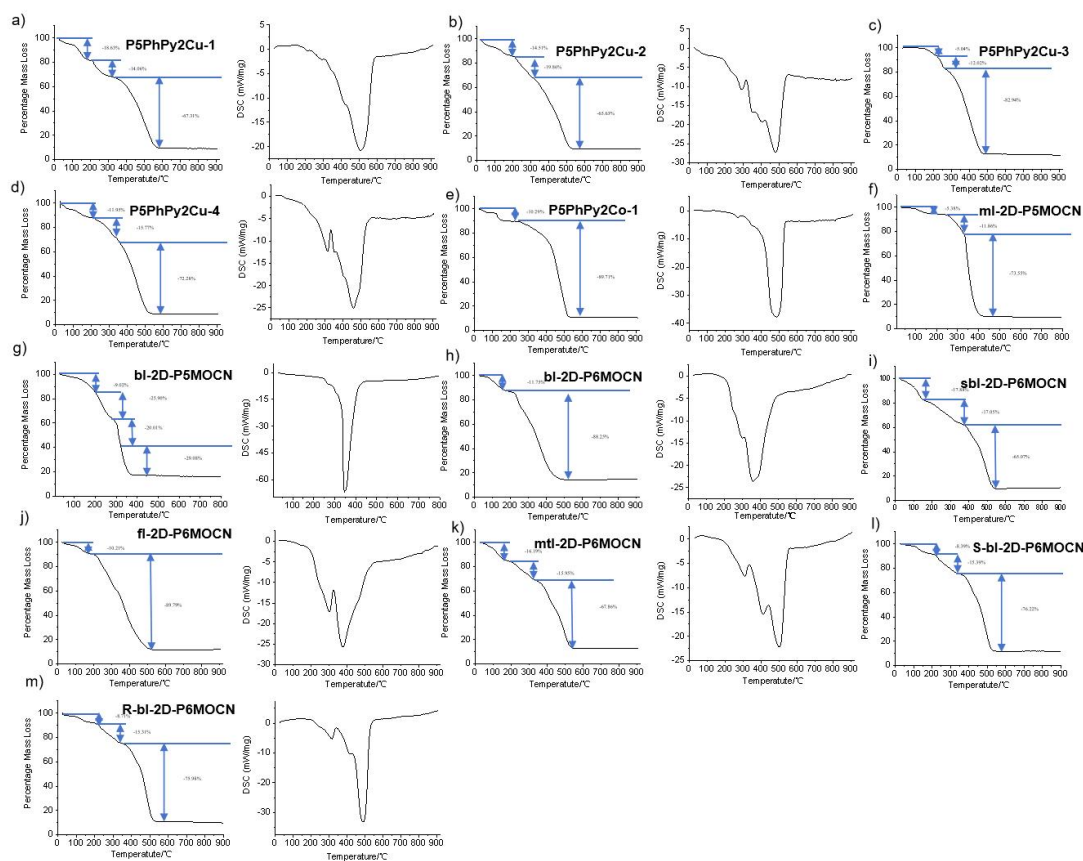

Figure S57. Tg and DSC spectra of P5PhPy2Cu-1(a), P5PhPy2Cu-2(b), P5PhPy2Cu-3(c), P5PhPy2Cu-4(d), P5PhPy2Co-1(e), ml-2D-P5MOCN(f), bl-2D-P5MOCN(g), bl-2D-P6MOCN(h), sbi-2D-P6MOCN(i), fl-2D-P6MOCN(j), mtl-2D-P6MOCN(k), R-bl-2D-P6MOCN(l), S-bl-2D-P6MOCN(m).

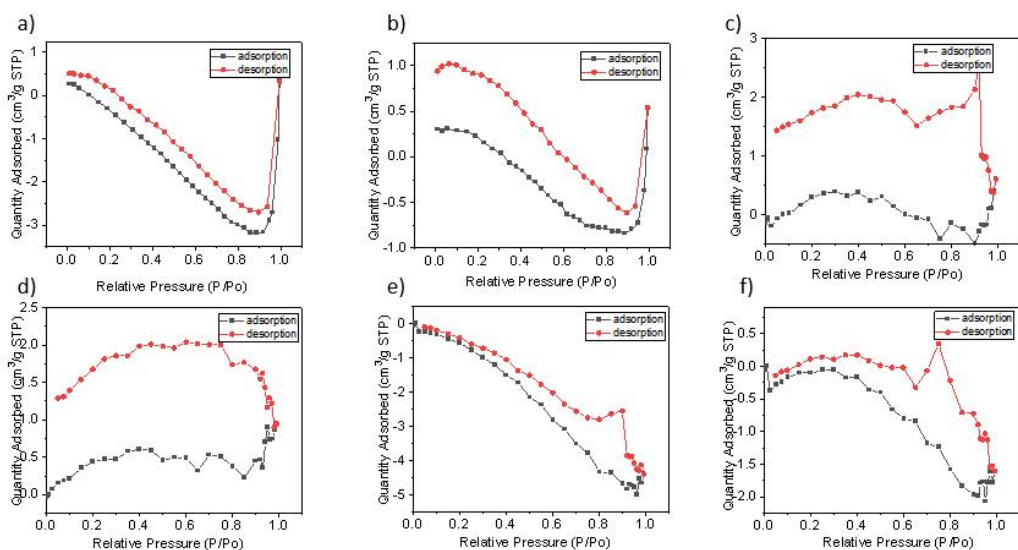

**Figure S58.** N<sub>2</sub> adsorption isotherms of ml-2D-P5MOCN(a), bl-2D-P5MOCN (b), bl-2D-P6MOCN(c), sbi-2D-P6MOCN(d), fl-2D-P6MOCN(e) and mtl-2D-P6MOCN (f).

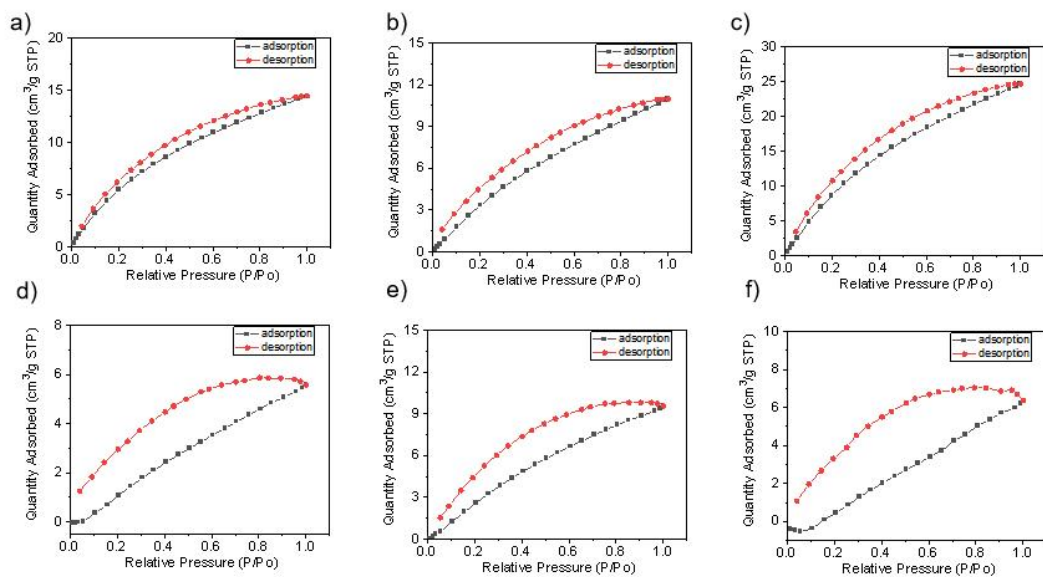

**Figure S59.** CO<sub>2</sub> adsorption (black) and desorption (red) isotherms of ml-2D-P5MOCN (a), bl-2D-P5MOCN (b), bl-2D-P6MOCN (c), sbi-2D-P6MOCN (d), fl-2D-P6MOCN (e) and mtl-2D-P6MOCN (f).

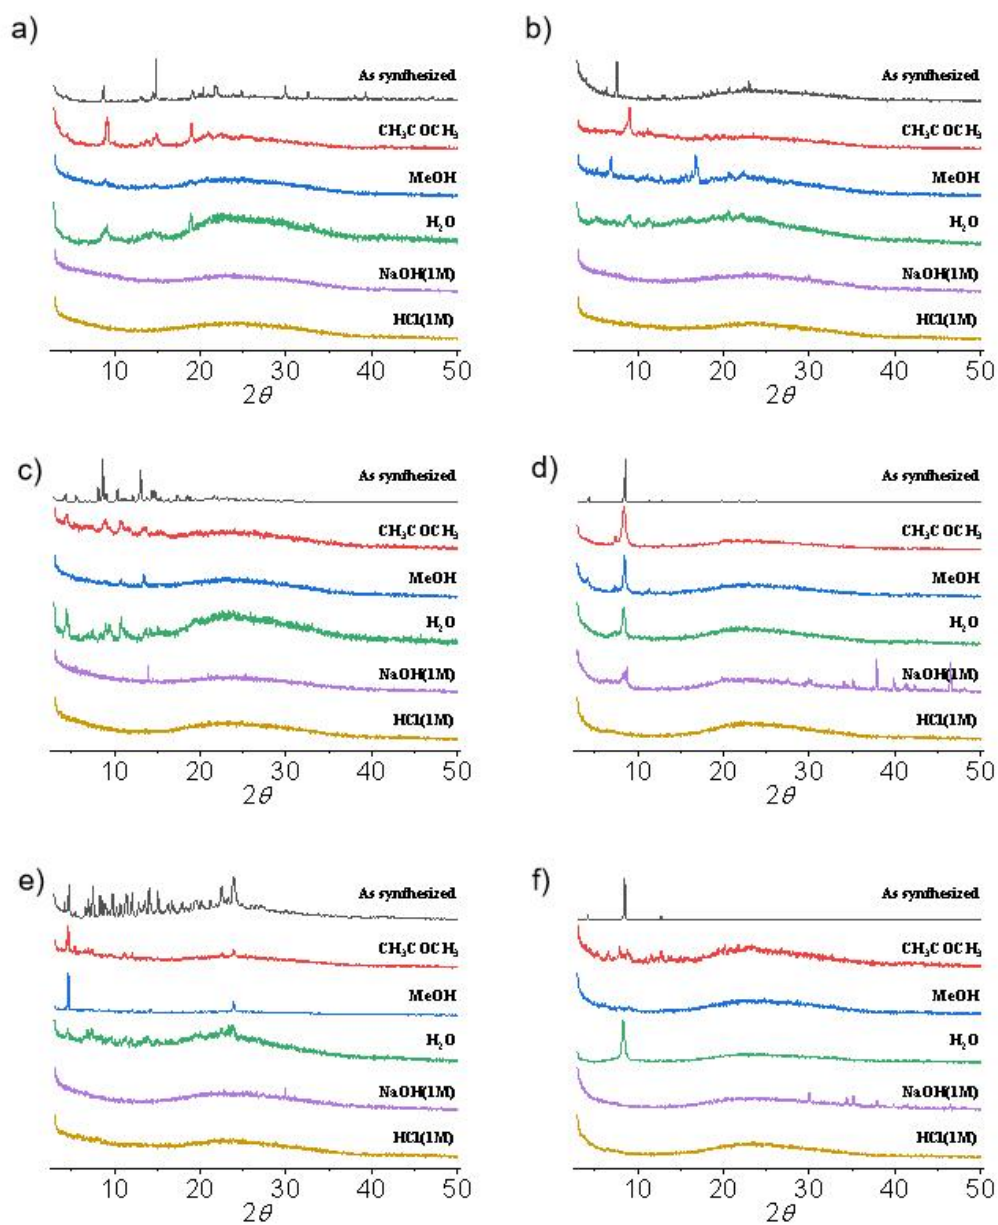

**Figure S60.** PXRD patterns of ml-2D-P5MOCN (a), bl-2D-P5MOCN (b), bl-2D-P6MOCN (c), sbl-2D-P6MOCN (d), fl-2D-P6MOCN (e) and mtl-2D-P6MOCN (f) after immersed in different solution for 12h.

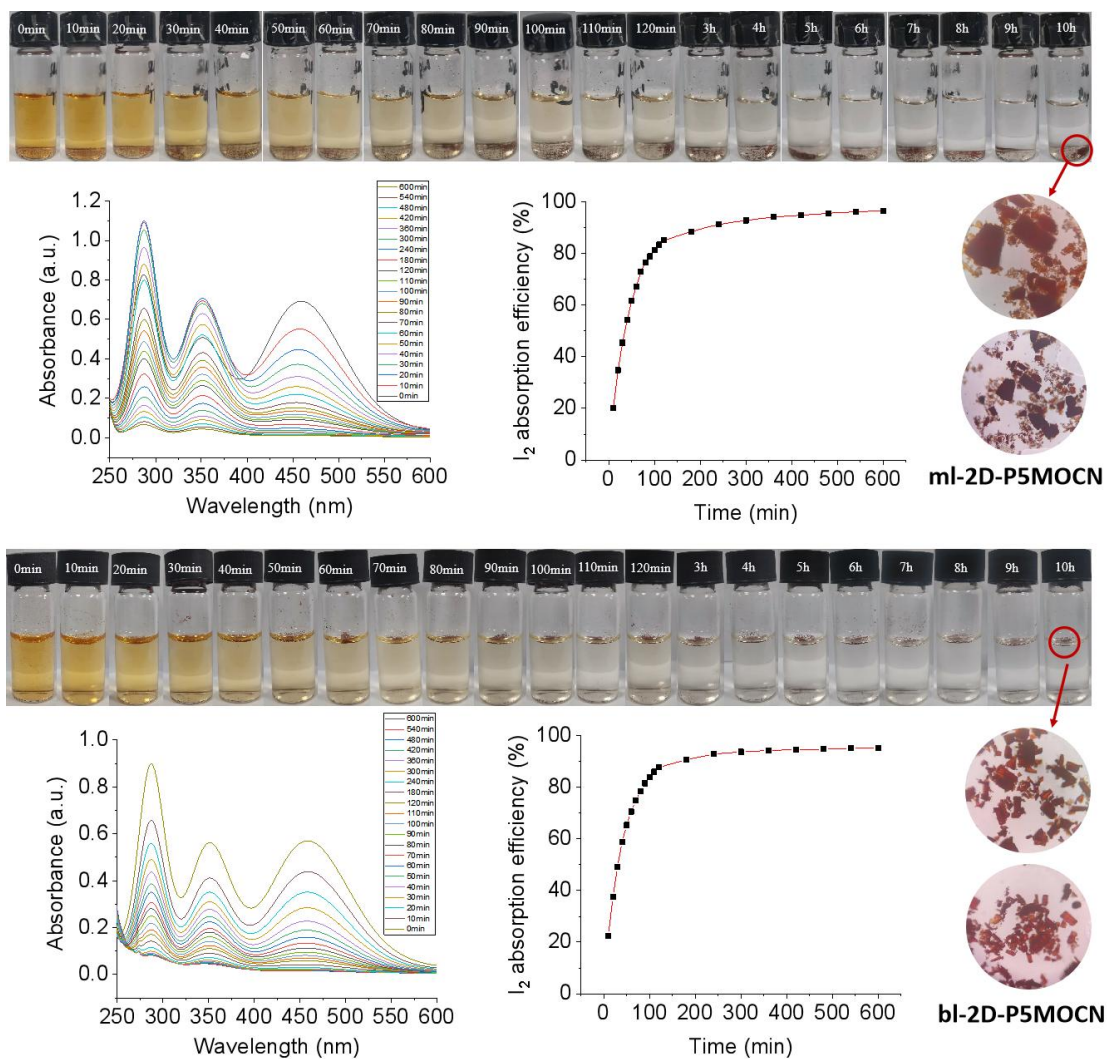

**Figure S61.** The I<sub>2</sub> adsorption experiments (1mM, 2.5 ml) of ml-2D-P5MOCN (1mg, up) and bl-2D-P5MOCN (1mg, down) in water.



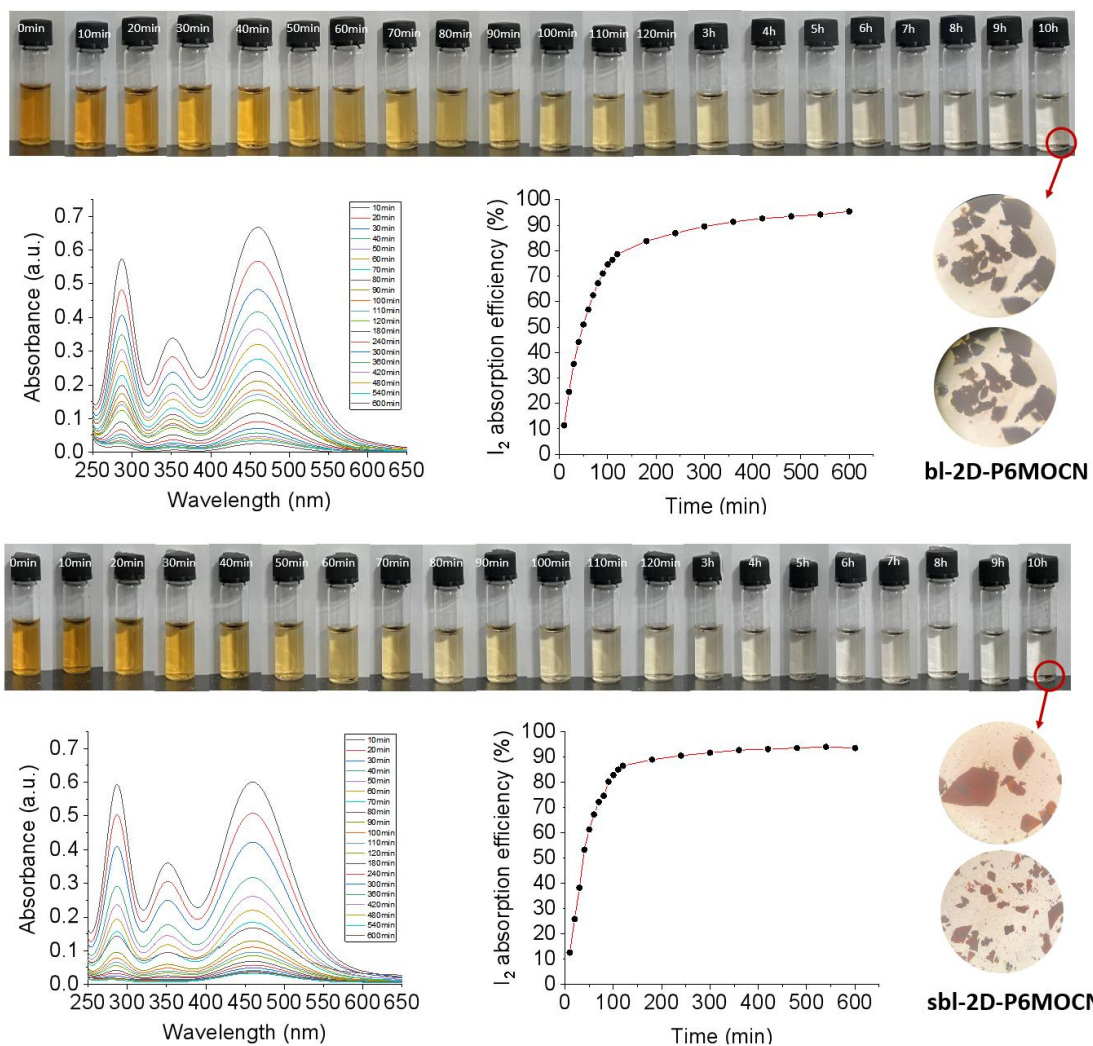

**Figure S62.** The I<sub>2</sub> adsorption experiments (1mM, 2.5 ml) of **bl-2D-P6MOCN** (1mg, up) and **sbi-2D-P6MOCN** (1mg, down) in water.

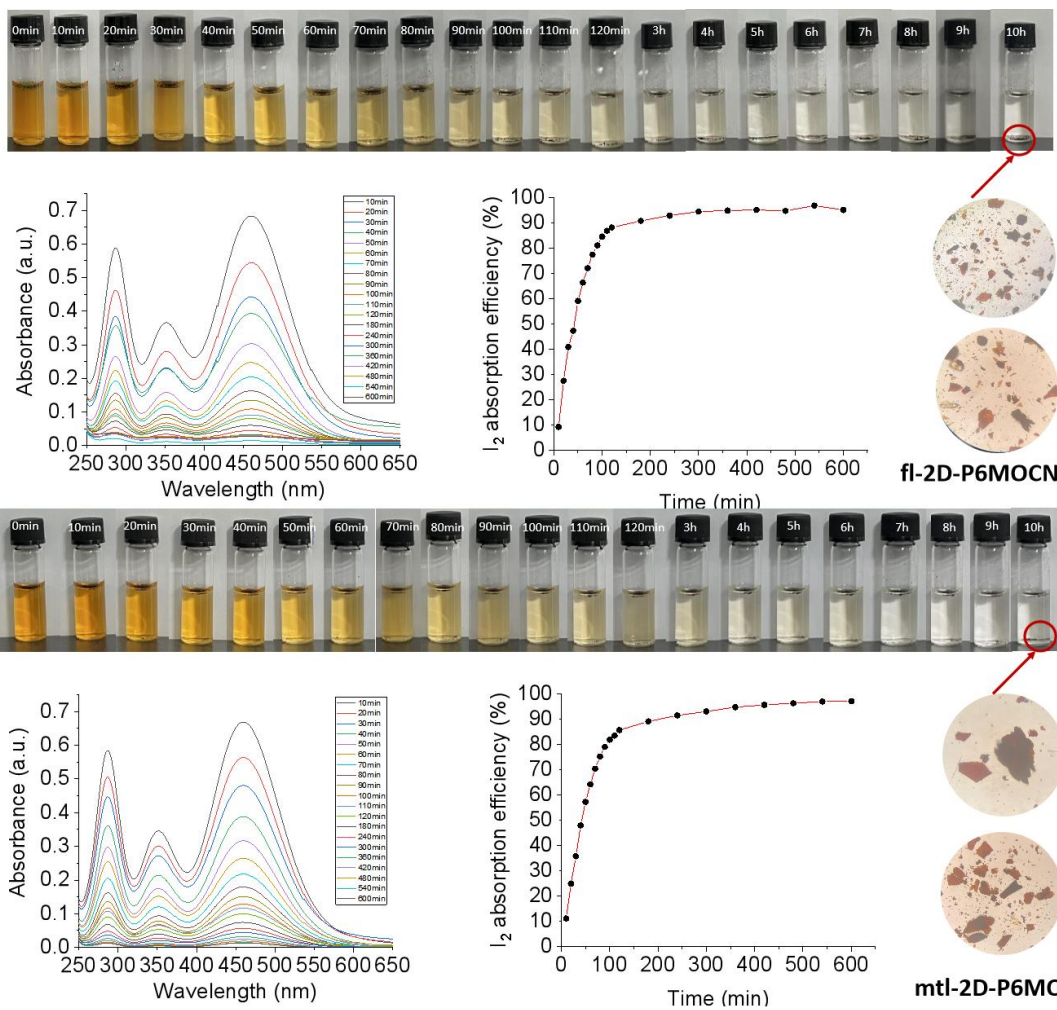

**Figure S63.** The I<sub>2</sub> adsorption experiments (1mM, 2.5 ml) of **fl-2D-P6MOCN** (1mg, up) and **mtl-2D-P6MOCN** (1mg, down) in water.



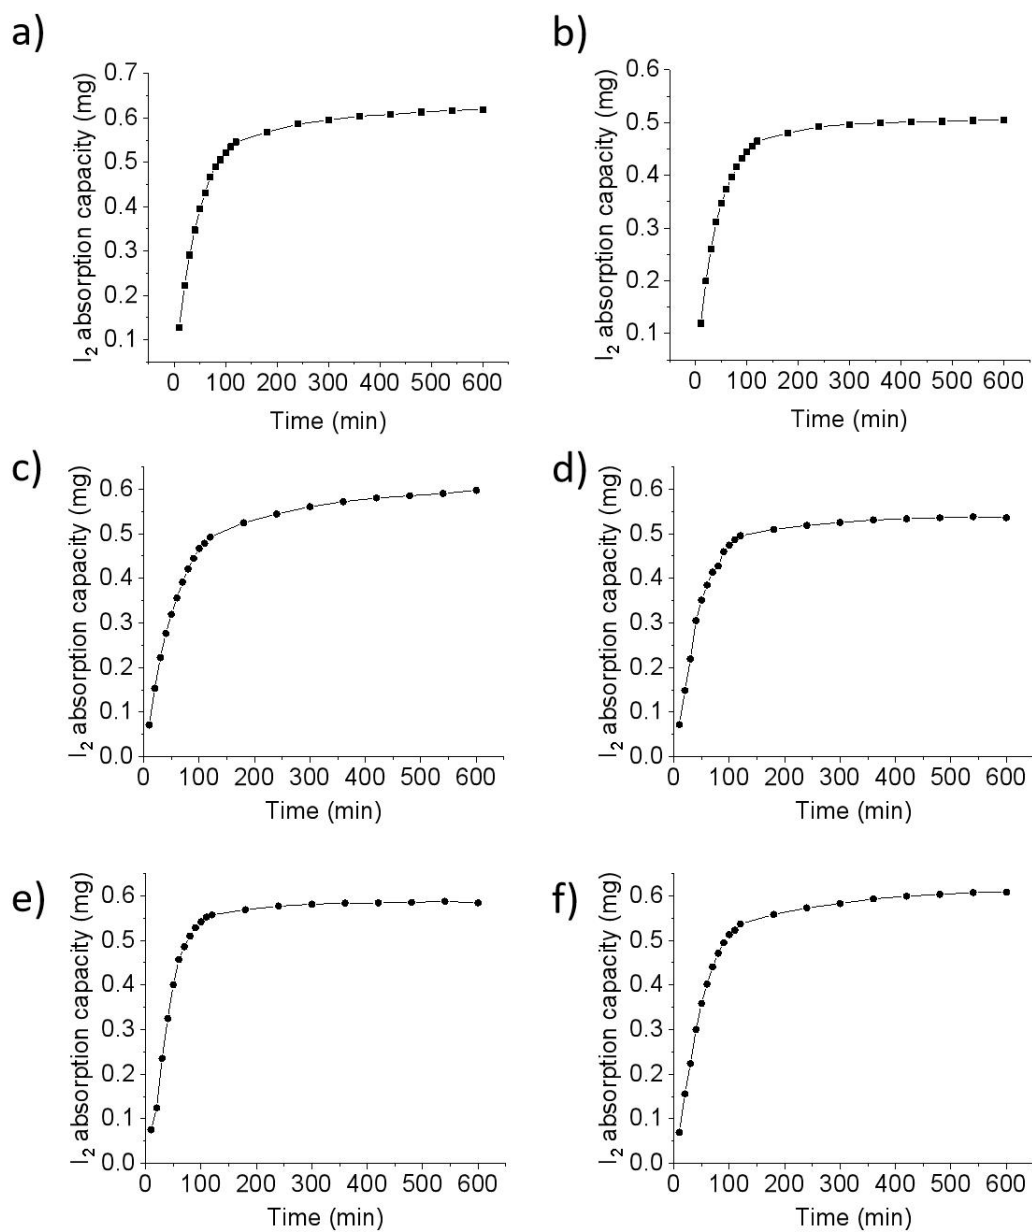

**Figure S64.** The I<sub>2</sub> adsorption experiments (1mM, 2.5 ml) of **ml-2D-P5MOCN** (1mg) (a), **bl-2D-P5MOCN** (1mg) (b), **bl-2D-P6MOCN** (1mg) (c), **sbl-2D-P6MOCN** (1mg) (d), **fl-2D-P6MOCN** (1mg) (e) and **mtl-2D-P6MOCN** (1mg) (f) in water.

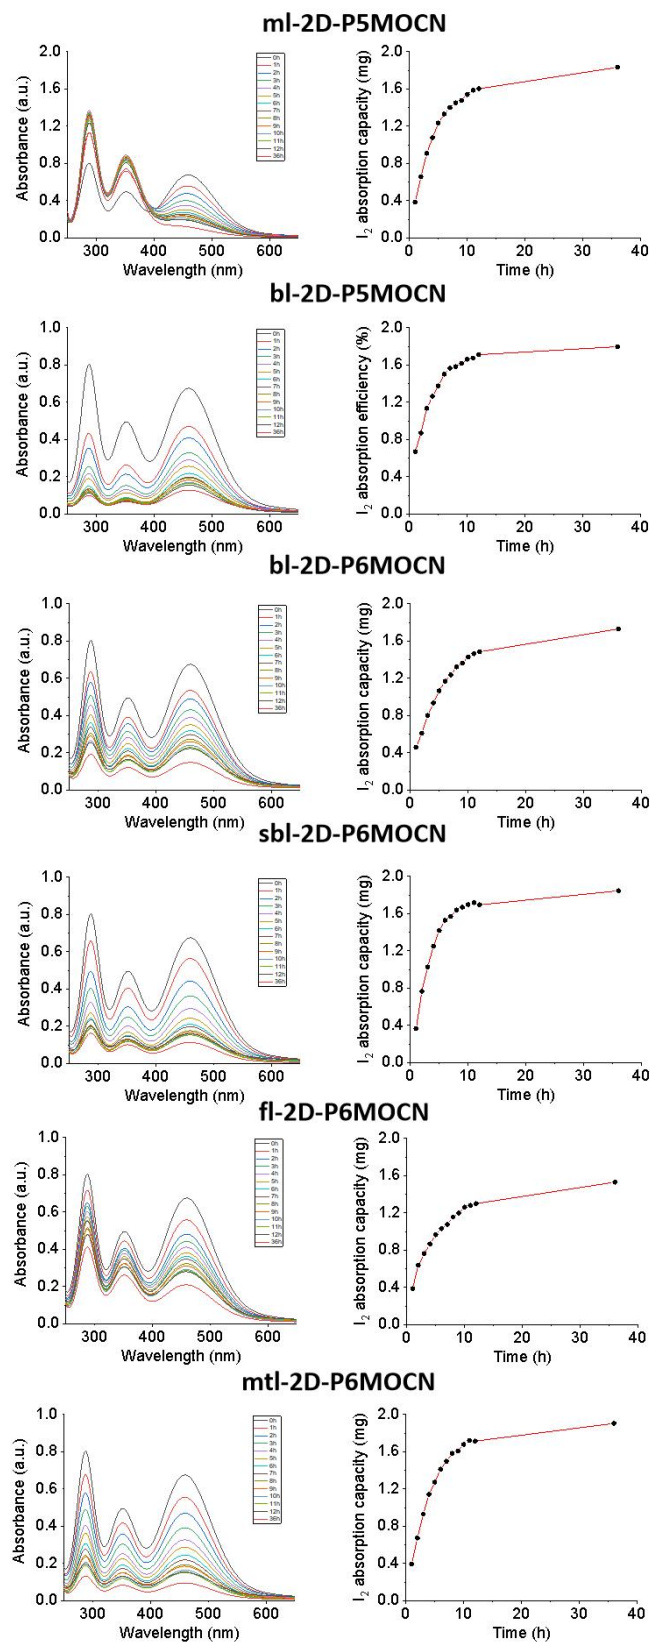

**Figure S65.** The  $I_2$  final adsorption experiments (1mM, 10 ml) of **ml-2D-P5MOCN** (1.0 mg), **bl-2D-P5MOCN** (1.0 mg), **bl-2D-P6MOCN** (1.0 mg), **sbi-2D-P6MOCN** (1.0 mg), **fl-2D-P6MOCN** (1.0 mg) and **mtl-2D-P6MOCN** (1.0 mg) in water.

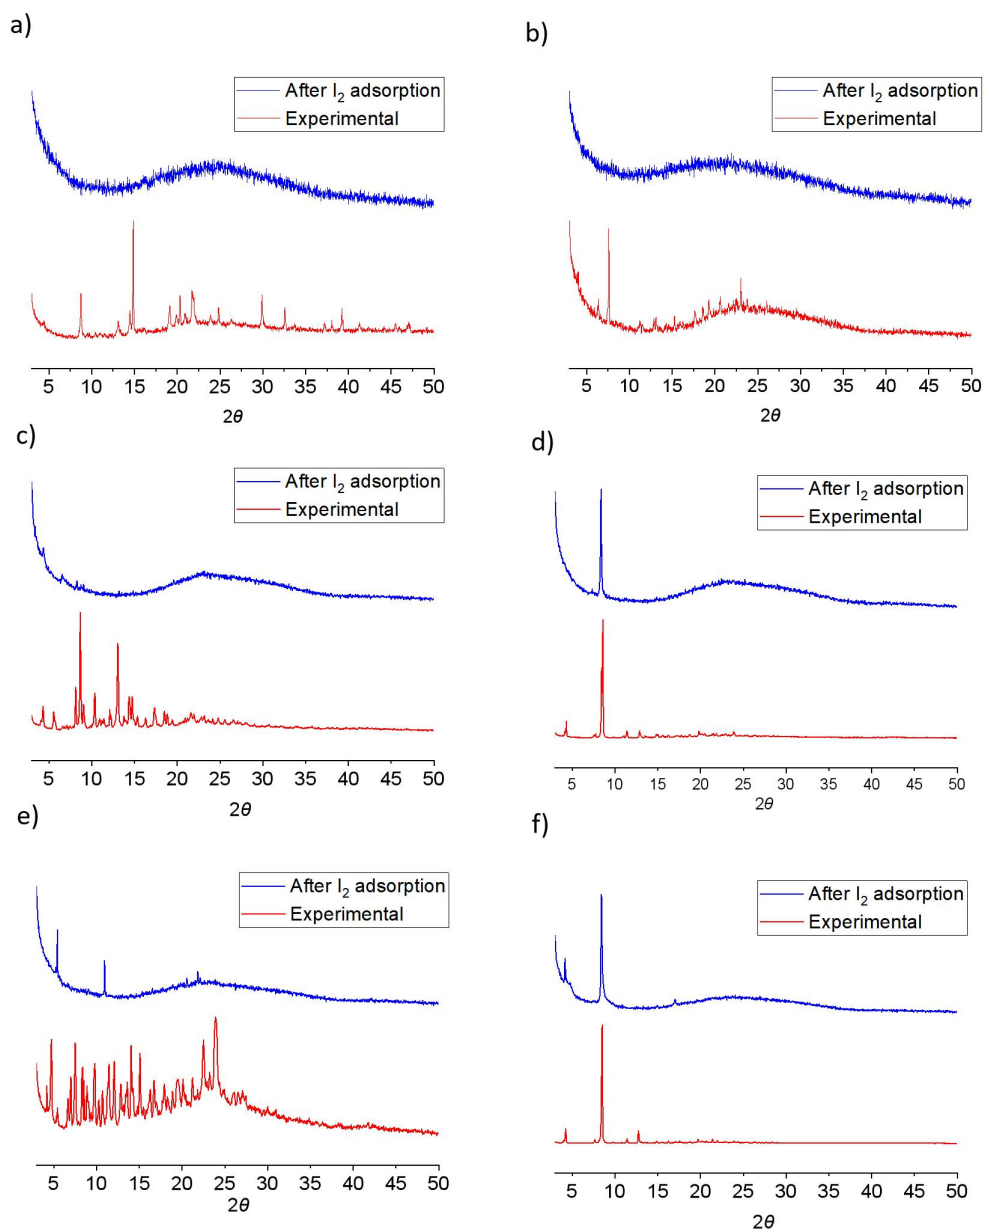

**Figure S66.** Experimental (red) and adsorbing iodine (blue) PXRD patterns of  $I_2$ /ml-2D-P5MOCN (a),  $I_2$ /bl-2D-P5MOCN (b),  $I_2$ /bl-2D-P6MOCN (c),  $I_2$ /sbl-2D-P6MOCN (d),  $I_2$ /fl-2D-P6MOCN (e) and  $I_2$ /mtl-2D-P6MOCN (f).

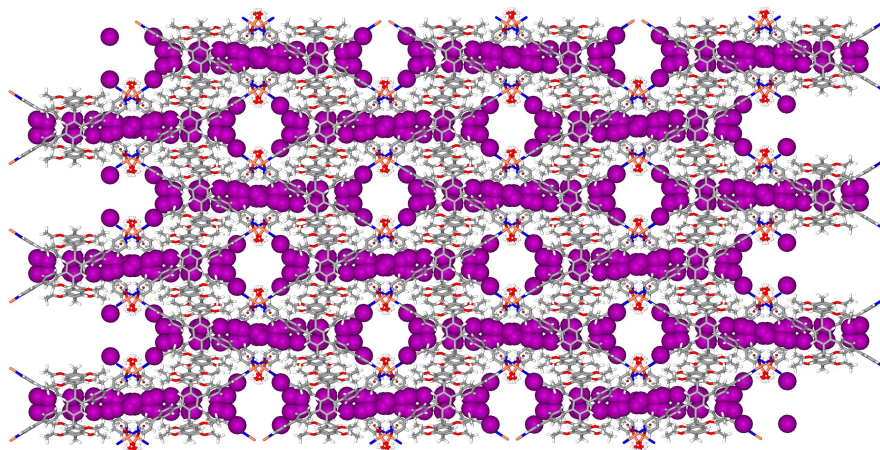

**Figure S67.** The side view of **mtl-2D-P6MOCN** after iodine adsorption experiment in water.

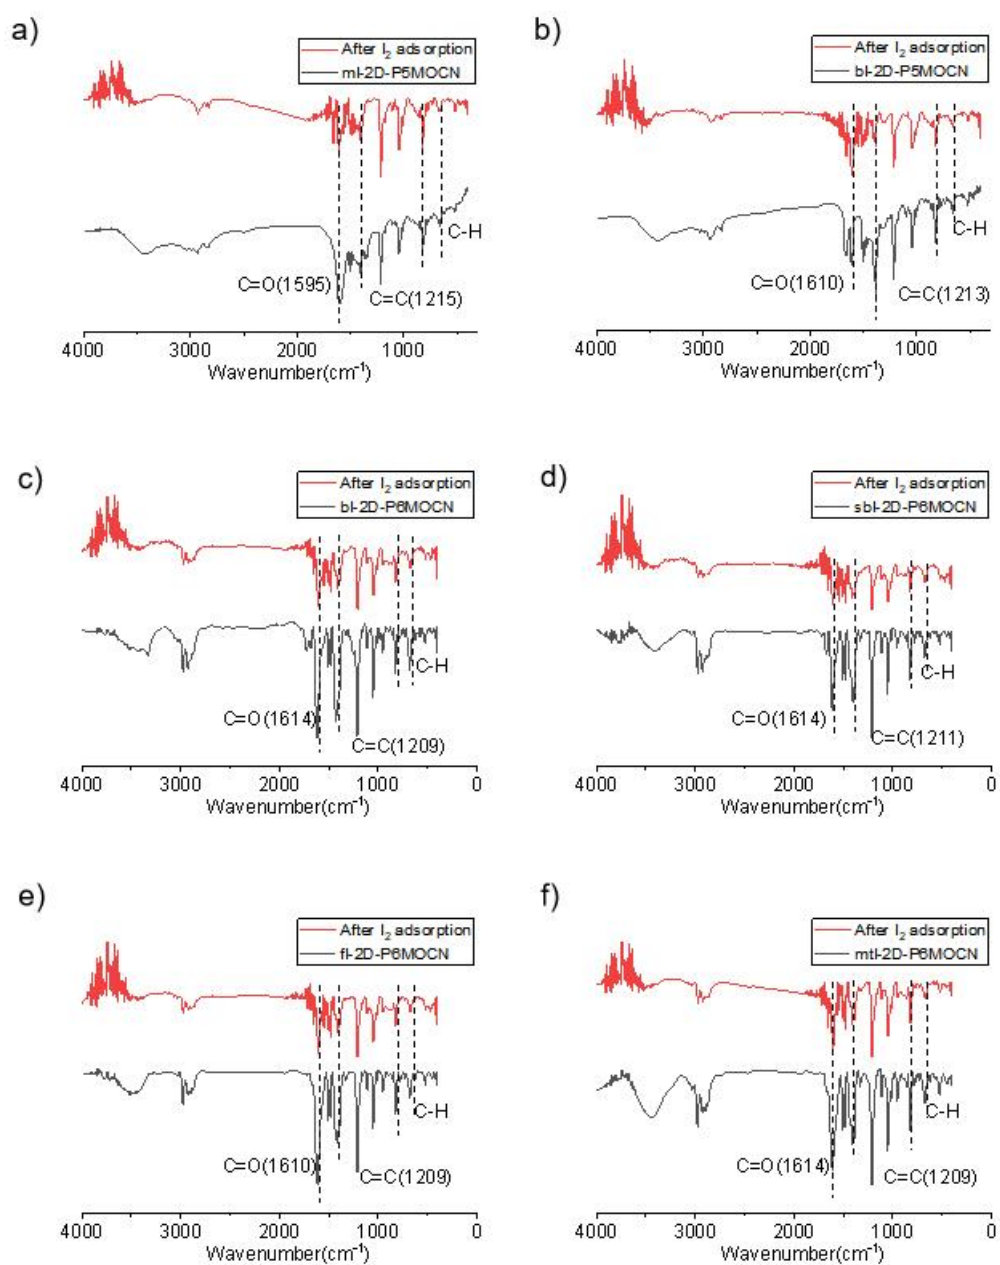

**Figure S68.** FT-IR spectra of **ml-2D-P5MOCN** (a), **bl-2D-P5MOCN** (b), **bl-2D-P6MOCN** (c), **sbl-2D-P6MOCN** (d), **fl-2D-P6MOCN** (e) and **mtl-2D-P6MOCN** (f) before (black) and after iodine adsorption (red).

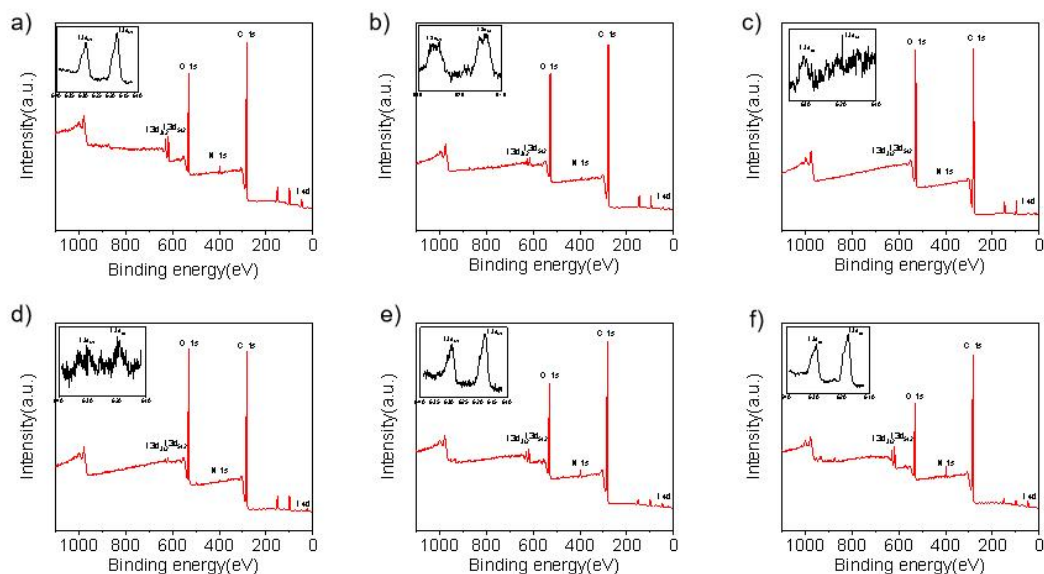

**Figure S69.** The XPS spectra of **ml-2D-P5MOCN** (a), **bl-2D-P5MOCN** (b), **bl-2D-P6MOCN** (c), **sbll-2D-P6MOCN** (d), **fl-2D-P6MOCN** (e) and **mtl-2D-P6MOCN** (f) after iodine adsorption.

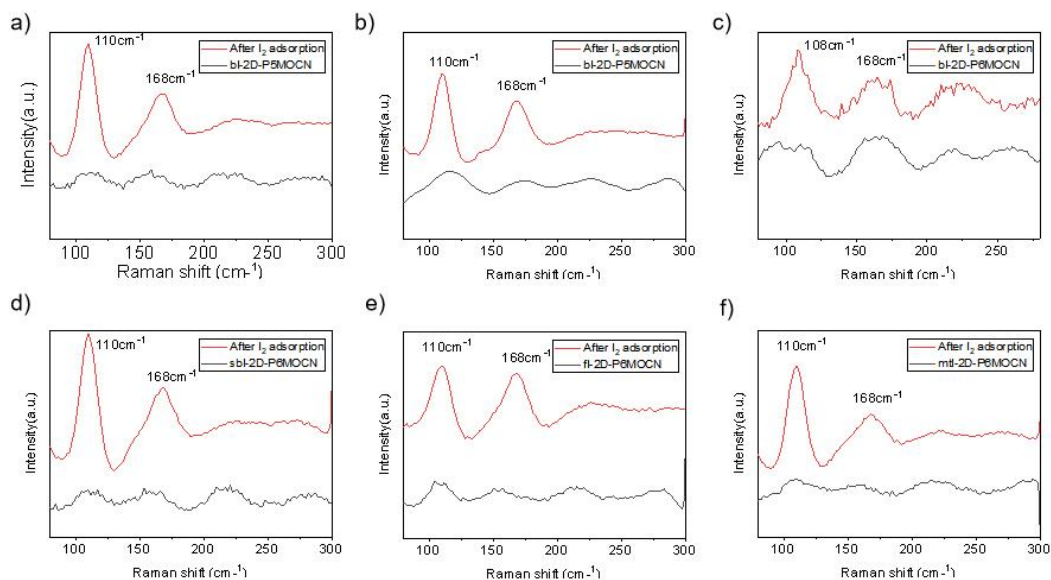

**Figure S70.** Raman spectra of **ml-2D-P5MOCN** (a), **bl-2D-P5MOCN** (b), **bl-2D-P6MOCN** (c), **sbll-2D-P6MOCN** (d), **fl-2D-P6MOCN** (e) and **mtl-2D-P6MOCN** (f) before (black) and after iodine adsorption (red).



## Crystal data and structure refinement

**Table S1.** Crystal data and structure refinement for **P5PhPy2**, **P5PhPy4** and **P6PhPy4**.

| Name                                        | <b>P5PhPy2</b>                                                                                     | <b>P5PhPy4</b>                                                                | <b>P6PhPy4</b>                                                   |
|---------------------------------------------|----------------------------------------------------------------------------------------------------|-------------------------------------------------------------------------------|------------------------------------------------------------------|
| Identification code                         | 2244321                                                                                            | 2244320                                                                       | 2326170                                                          |
| Empirical formula                           | C <sub>67</sub> H <sub>66</sub> Cu <sub>0.25</sub> I <sub>0.25</sub> N <sub>7</sub> O <sub>3</sub> | C <sub>89</sub> H <sub>82</sub> Cl <sub>4</sub> N <sub>4</sub> O <sub>8</sub> | C <sub>102</sub> H <sub>99</sub> N <sub>4</sub> O <sub>9.5</sub> |
| Formula weight                              | 1064.87                                                                                            | 1477.38                                                                       | 1532.85                                                          |
| Temperature/K                               | 301(2)K                                                                                            | 193                                                                           | 193.00                                                           |
| Crystal system                              | monoclinic                                                                                         | triclinic                                                                     | monoclinic                                                       |
| Space group                                 | P121/n1                                                                                            | P-1                                                                           | P2 <sub>1</sub> /n                                               |
| a/Å                                         | 12.6808(11)                                                                                        | 12.9179(3)                                                                    | 10.3276(9)                                                       |
| b/Å                                         | 24.763(2)                                                                                          | 17.0625(4)                                                                    | 32.363(2)                                                        |
| c/Å                                         | 18.6875(5)                                                                                         | 17.3348(4)                                                                    | 25.149(2)                                                        |
| α/°                                         | 90                                                                                                 | 94.9090(10)                                                                   | 90                                                               |
| β/°                                         | 97.784(6)                                                                                          | 97.0560(10)                                                                   | 95.279(3)                                                        |
| γ/°                                         | 90                                                                                                 | 91.9560(10)                                                                   | 90                                                               |
| Volume/Å <sup>3</sup>                       | 5814.1(9)                                                                                          | 3774.09(15)                                                                   | 8370.0(12)                                                       |
| Z                                           | 4                                                                                                  | 2                                                                             | 4                                                                |
| ρ <sub>calc</sub> /cm <sup>3</sup>          | 1.217                                                                                              | 1.300                                                                         | 1.216                                                            |
| μ/mm <sup>-1</sup>                          | 1.702                                                                                              | 1.259                                                                         | 0.078                                                            |
| F(000)                                      | 2246                                                                                               | 1552.0                                                                        | 3260.0                                                           |
| Crystal size/mm <sup>3</sup>                | 0.100 x 0.180 x 0.200                                                                              | 0.13 × 0.12 × 0.1                                                             | 0.16 × 0.15 × 0.08                                               |
| Radiation                                   | CuKα (λ = 1.54178)                                                                                 | GaKα (λ = 1.34139)                                                            | MoKα (λ = 0.71073)                                               |
| 2 θ range for data collection/°             | 2.98 to 65.13°                                                                                     | 4.488 to 107.806                                                              | 3.488 to 50.976                                                  |
| Index ranges                                | -14 ≤ h ≤ 14, -28 ≤ k ≤ 29, -21 ≤ l ≤ 21                                                           | -15 ≤ h ≤ 15, -20 ≤ k ≤ 19, -20 ≤ l ≤ 20                                      | -11 ≤ h ≤ 12, -39 ≤ k ≤ 38, -30 ≤ l ≤ 30                         |
| Reflections collected                       | 57994                                                                                              | 47111                                                                         | 64178                                                            |
| Independent reflections                     | 9904 [R <sub>int</sub> = 0.1226]                                                                   | 13808 [R <sub>int</sub> = 0.0566, R <sub>sigma</sub> = 0.0622]                | 15486 [R <sub>int</sub> = 0.1325, R <sub>sigma</sub> = 0.1314]   |
| Data/restraints/parameters                  | 9904 / 0 / 684                                                                                     | 13808/19/967                                                                  | 15486/2/1045                                                     |
| Goodness-of-fit on F <sup>2</sup>           | 1.013                                                                                              | 1.038                                                                         | 1.096                                                            |
| Final R indexes [I >= 2 σ (I)]              | R <sub>1</sub> = 0.0643, wR <sub>2</sub> = 0.1578                                                  | R <sub>1</sub> = 0.0842, wR <sub>2</sub> = 0.2324                             | R <sub>1</sub> = 0.0982, wR <sub>2</sub> = 0.1608                |
| Final R indexes [all data]                  | R <sub>1</sub> = 0.1047, wR <sub>2</sub> = 0.1868                                                  | R <sub>1</sub> = 0.1340, wR <sub>2</sub> = 0.2696                             | R <sub>1</sub> = 0.1995, wR <sub>2</sub> = 0.2024                |
| Largest diff. peak/hole / e Å <sup>-3</sup> | 0.185/-0.213                                                                                       | 1.11/-1.38                                                                    | 0.30/-0.26                                                       |

**Table S2.** Crystal data and structure refinement for **P5PhPy2Cu-1-P5PhPy2Cu-4**.

| Name                                      | P5PhPy2Cu-1                                                                     | P5PhPy2Cu-2                                                                      | P5PhPy2Cu-3                                                                    | P5PhPy2Cu-4                                                                                                  |
|-------------------------------------------|---------------------------------------------------------------------------------|----------------------------------------------------------------------------------|--------------------------------------------------------------------------------|--------------------------------------------------------------------------------------------------------------|
| Identification code                       | 2244322                                                                         | 2244323                                                                          | 2244324                                                                        | 2244325                                                                                                      |
| Empirical formula                         | C <sub>85</sub> H <sub>102</sub> Cu <sub>2</sub> N <sub>6</sub> O <sub>21</sub> | C <sub>164</sub> H <sub>202</sub> Cu <sub>4</sub> N <sub>4</sub> O <sub>46</sub> | C <sub>76</sub> H <sub>81</sub> Cu <sub>2</sub> N <sub>3</sub> O <sub>18</sub> | C <sub>75.69</sub> H <sub>82.28</sub> N <sub>4.5</sub> O <sub>13.69</sub> Cu <sub>1</sub> Cl <sub>0.41</sub> |
| Formula weight                            | 1670.80                                                                         | 3303.50                                                                          | 1451.51                                                                        | 1351.96                                                                                                      |
| Temperature/K                             | 292.00                                                                          | 193.00                                                                           | 150.00                                                                         | 153.15                                                                                                       |
| Crystal system                            | monoclinic                                                                      | monoclinic                                                                       | triclinic                                                                      | triclinic                                                                                                    |
| Space group                               | P2 <sub>1</sub>                                                                 | P2 <sub>1</sub>                                                                  | P-1                                                                            | P-1                                                                                                          |
| a/Å                                       | 12.0846(19)                                                                     | 12.1284(9)                                                                       | 12.3580(3)                                                                     | 13.2377(3)                                                                                                   |
| b/Å                                       | 21.322(4)                                                                       | 21.1102(19)                                                                      | 16.3529(4)                                                                     | 14.9966(3)                                                                                                   |
| c/Å                                       | 19.015(3)                                                                       | 35.055(3)                                                                        | 17.9257(4)                                                                     | 20.4324(4)                                                                                                   |
| α/°                                       | 90                                                                              | 90                                                                               | 97.3870(10)                                                                    | 81.365(2)                                                                                                    |
| β/°                                       | 104.018(5)                                                                      | 96.044(4)                                                                        | 103.4240(10)                                                                   | 71.316(2)                                                                                                    |
| γ/°                                       | 90                                                                              | 90                                                                               | 98.4550(10)                                                                    | 86.856(2)                                                                                                    |
| Volume/Å <sup>3</sup>                     | 4753.7(14)                                                                      | 8925.4(13)                                                                       | 3435.12(14)                                                                    | 3798.83(14)                                                                                                  |
| Z                                         | 2                                                                               | 2                                                                                | 2                                                                              | 2                                                                                                            |
| ρ <sub>calc</sub> /cm <sup>3</sup>        | 1.167                                                                           | 1.229                                                                            | 1.403                                                                          | 1.182                                                                                                        |
| μ/mm <sup>-1</sup>                        | 0.513                                                                           | 2.951                                                                            | 0.694                                                                          | 1.042                                                                                                        |
| F(000)                                    | 1760.0                                                                          | 3480.0                                                                           | 1520.0                                                                         | 1427.0                                                                                                       |
| Crystal size/mm <sup>3</sup>              | 0.13 × 0.12 × 0.1                                                               | 0.13 × 0.12 × 0.1                                                                | 0.2 × 0.16 × 0.13                                                              | 0.16 × 0.1 × 0.02                                                                                            |
| Radiation                                 | MoKα (λ = 0.71073)                                                              | GaKα (λ = 1.34139)                                                               | MoKα (λ = 0.71073)                                                             | CuKα (λ = 1.54178)                                                                                           |
| 2 θ range for data collection/°           | 3.964 to 43.934                                                                 | 4.258 to 107.812                                                                 | 2.554 to 52.872                                                                | 5.96 to 149.532                                                                                              |
| Index ranges                              | -12 ≤ h ≤ 12, -22 ≤ k ≤ 22, -20 ≤ l ≤ 20                                        | -14 ≤ h ≤ 14, -25 ≤ k ≤ 25, -42 ≤ l ≤ 42                                         | -15 ≤ h ≤ 15, -19 ≤ k ≤ 20, -22 ≤ l ≤ 22                                       | -16 ≤ h ≤ 16, -18 ≤ k ≤ 17, -25 ≤ l ≤ 25                                                                     |
| Reflections collected                     | 66475                                                                           | 54062                                                                            | 54142                                                                          | 102440                                                                                                       |
| Independent reflections                   | 11585 [R <sub>int</sub> = 0.0911, R <sub>sigma</sub> = 0.0578]                  | 29261 [R <sub>int</sub> = 0.0530, R <sub>sigma</sub> = 0.1150]                   | 14051 [R <sub>int</sub> = 0.0518, R <sub>sigma</sub> = 0.0545]                 | 15301 [R <sub>int</sub> = 0.0557, R <sub>sigma</sub> = 0.0357]                                               |
| Data/restraints/parameters                | 11585/1966/1088                                                                 | 29261/104/1720                                                                   | 14051/67/907                                                                   | 15301/1234/1037                                                                                              |
| Goodness-of-fit on F <sup>2</sup>         | 1.039                                                                           | 1.001                                                                            | 1.063                                                                          | 1.029                                                                                                        |
| Final R indexes [I ≥ 2σ (I)]              | R <sub>1</sub> = 0.0696, wR <sub>2</sub> = 0.1862                               | R <sub>1</sub> = 0.0678, wR <sub>2</sub> = 0.1710                                | R <sub>1</sub> = 0.0765, wR <sub>2</sub> = 0.2088                              | R <sub>1</sub> = 0.0779, wR <sub>2</sub> = 0.2378                                                            |
| Final R indexes [all data]                | R <sub>1</sub> = 0.1012, wR <sub>2</sub> = 0.2079                               | R <sub>1</sub> = 0.1338, wR <sub>2</sub> = 0.1979                                | R <sub>1</sub> = 0.1013, wR <sub>2</sub> = 0.2213                              | R <sub>1</sub> = 0.0881, wR <sub>2</sub> = 0.2497                                                            |
| Largest diff. peak/hole/e Å <sup>-3</sup> | 0.48(3)                                                                         | 0.40/-0.50                                                                       | 1.02/-1.16                                                                     | 1.22/-0.64                                                                                                   |

**Table S3.** Crystal data and structure refinement for **P5PhPy2Co-1**, **ml-2D-P5MOCN** and **bl-2D-P5MOCN**.

| Name                                        | <b>P5PhPy2Co-1</b>                                                | <b>ml-2D-P5MOCN</b>                                                                 | <b>bl-2D-P5MOCN</b>                                                 |
|---------------------------------------------|-------------------------------------------------------------------|-------------------------------------------------------------------------------------|---------------------------------------------------------------------|
| Identification code                         | 2244326                                                           | 2244327                                                                             | 2244328                                                             |
| Empirical formula                           | C <sub>81</sub> H <sub>102</sub> CoN <sub>6</sub> O <sub>20</sub> | C <sub>409</sub> H <sub>429</sub> Co <sub>8</sub> N <sub>29</sub> O <sub>76.5</sub> | C <sub>100</sub> H <sub>109</sub> CoN <sub>11</sub> O <sub>19</sub> |
| Formula weight                              | 1538.61                                                           | 7446.23                                                                             | 1827.91                                                             |
| Temperature/K                               | 193.00                                                            | 193.00                                                                              | 193.00                                                              |
| Crystal system                              | triclinic                                                         | monoclinic                                                                          | triclinic                                                           |
| Space group                                 | P-1                                                               | P2 <sub>1</sub>                                                                     | P-1                                                                 |
| a/Å                                         | 13.9662(6)                                                        | 18.5576(19)                                                                         | 13.9766(5)                                                          |
| b/Å                                         | 14.9970(6)                                                        | 40.892(4)                                                                           | 18.8234(8)                                                          |
| c/Å                                         | 20.3479(8)                                                        | 24.167(2)                                                                           | 24.3526(9)                                                          |
| α/°                                         | 94.792(2)                                                         | 90                                                                                  | 112.3290(10)                                                        |
| β/°                                         | 106.615(3)                                                        | 90.150(6)                                                                           | 103.5880(10)                                                        |
| γ/°                                         | 92.619(3)                                                         | 90                                                                                  | 92.9400(10)                                                         |
| Volume/Å <sup>3</sup>                       | 4058.9(3)                                                         | 18339(3)                                                                            | 5689.8(4)                                                           |
| Z                                           | 2                                                                 | 2                                                                                   | 2                                                                   |
| ρ <sub>calc</sub> /cm <sup>3</sup>          | 1.259                                                             | 1.348                                                                               | 1.067                                                               |
| μ/mm <sup>-1</sup>                          | 1.543                                                             | 2.383                                                                               | 0.213                                                               |
| F(000)                                      | 1634.0                                                            | 7828                                                                                | 1930.0                                                              |
| Crystal size/mm <sup>3</sup>                | 0.13 × 0.12 × 0.1                                                 | 0.12 × 0.1 × 0.08                                                                   | 0.13 × 0.12 × 0.1                                                   |
| Radiation                                   | GaKα (λ = 1.34139)                                                | GaK <sub>α</sub> (λ=1.34139 Å)                                                      | MoKα (λ = 0.71073)                                                  |
| 2θ range for data collection/°              | 5.76 to 107.81                                                    | 1.88 to 84.24                                                                       | 3.544 to 50.758                                                     |
| Index ranges                                | -16 ≤ h ≤ 16, -18 ≤ k ≤ 18, -24 ≤ l ≤ 19                          | -18 ≤ h ≤ 16, -34 ≤ k ≤ 40, -24 ≤ l ≤ 23                                            | -16 ≤ h ≤ 16, -22 ≤ k ≤ 15, -29 ≤ l ≤ 29                            |
| Reflections collected                       | 43239                                                             | 84763                                                                               | 44378                                                               |
| Independent reflections                     | 14819 [R <sub>int</sub> = 0.0806, R <sub>sigma</sub> = 0.1150]    | 35136 [R <sub>int</sub> = 0.1246, R <sub>sigma</sub> = 0.2317]                      | 20744 [R <sub>int</sub> = 0.0667, R <sub>sigma</sub> = 0.1122]      |
| Data/restraints/parameters                  | 14819/2324/1014                                                   | 35136/7263/3865                                                                     | 20744/238/1134                                                      |
| Goodness-of-fit on F <sup>2</sup>           | 1.017                                                             | 1.156                                                                               | 1.022                                                               |
| Final R indexes [I ≥ 2σ (I)]                | R <sub>1</sub> = 0.1242, wR <sub>2</sub> = 0.2793                 | R <sub>1</sub> = 0.1129, wR <sub>2</sub> = 0.2609                                   | R <sub>1</sub> = 0.0845, wR <sub>2</sub> = 0.2301                   |
| Final R indexes [all data]                  | R <sub>1</sub> = 0.2276, wR <sub>2</sub> = 0.3242                 | R <sub>1</sub> = 0.2205, wR <sub>2</sub> = 0.3069                                   | R <sub>1</sub> = 0.1353, wR <sub>2</sub> = 0.2653                   |
| Largest diff. peak/hole / e Å <sup>-3</sup> | 0.60/-0.55                                                        | 0.95/-0.75                                                                          | 0.94/-0.51                                                          |

**Table S4.** Crystal data and structure refinement for **bl-2D-P6MOCN**, **sbl-2D-P6MOCN** and **fl-2D-P6MOCN**.

| Name                                        | <b>bl-2D-P6MOCN</b>                                                              | <b>sbl-2D-P6MOCN(1)</b>                                                          | <b>sbl-2D-P6MOCN(2)</b>                                                          | <b>fl-2D-P6MOCN</b>                                                              |
|---------------------------------------------|----------------------------------------------------------------------------------|----------------------------------------------------------------------------------|----------------------------------------------------------------------------------|----------------------------------------------------------------------------------|
| Identification code                         | 2326171                                                                          | 2342430                                                                          | 2326172                                                                          | 2326174                                                                          |
| Empirical formula                           | C <sub>124</sub> H <sub>154</sub> Cu <sub>4</sub> N <sub>6</sub> O <sub>36</sub> | C <sub>122</sub> H <sub>148</sub> Cu <sub>2</sub> N <sub>8</sub> O <sub>26</sub> | C <sub>117</sub> H <sub>146</sub> Cu <sub>2</sub> N <sub>7</sub> O <sub>30</sub> | C <sub>126</sub> H <sub>148</sub> Cu <sub>3</sub> N <sub>8</sub> O <sub>27</sub> |
| Formula weight                              | 2558.68                                                                          | 2269.56                                                                          | 2257.48                                                                          | 2397.14                                                                          |
| Temperature/K                               | 193.00                                                                           | 193.00                                                                           | 193.00                                                                           | 193.00                                                                           |
| Crystal system                              | monoclinic                                                                       | monoclinic                                                                       | monoclinic                                                                       | triclinic                                                                        |
| Space group                                 | C2/c                                                                             | P2 <sub>1</sub> /n                                                               | C2/c                                                                             | P-1                                                                              |
| a/Å                                         | 30.2976(8)                                                                       | 13.7491(7)                                                                       | 22.8584(7)                                                                       | 16.692(2)                                                                        |
| b/Å                                         | 30.0377(8)                                                                       | 41.664(2)                                                                        | 41.6812(12)                                                                      | 19.198(3)                                                                        |
| c/Å                                         | 15.6700(4)                                                                       | 22.7927(13)                                                                      | 13.7257(5)                                                                       | 20.104(3)                                                                        |
| α/°                                         | 90                                                                               | 90                                                                               | 90                                                                               | 69.195(4)                                                                        |
| β/°                                         | 91.5770(10)                                                                      | 91.860(3)                                                                        | 92.088(2)                                                                        | 81.270(4)                                                                        |
| γ/°                                         | 90                                                                               | 90                                                                               | 90                                                                               | 83.209(3)                                                                        |
| Volume/Å <sup>3</sup>                       | 14255.4(6)                                                                       | 13049.9(12)                                                                      | 13068.7(7)                                                                       | 5938.0(14)                                                                       |
| Z                                           | 4                                                                                | 4                                                                                | 4                                                                                | 2                                                                                |
| ρ <sub>calc</sub> /cm <sup>3</sup>          | 1.192                                                                            | 1.155                                                                            | 1.147                                                                            | 1.341                                                                            |
| μ/mm <sup>-1</sup>                          | 1.266                                                                            | 2.117                                                                            | 0.976                                                                            | 0.610                                                                            |
| F(000)                                      | 5376.0                                                                           | 4088.0                                                                           | 4780.0                                                                           | 2526.0                                                                           |
| Crystal size/mm <sup>3</sup>                | 0.13 × 0.1 × 0.1                                                                 | 0.14 × 0.11 × 0.09                                                               | 0.14 × 0.11 × 0.08                                                               | 0.14 × 0.11 × 0.08                                                               |
| Radiation                                   | CuKα (λ = 1.54178)                                                               | GaKα (λ = 1.34139)                                                               | CuKα (λ = 1.54178)                                                               | MoKα (λ = 0.71073)                                                               |
| 2 θ range for data collection/°             | 4.142 to 159.45                                                                  | 3.846 to 107.814                                                                 | 4.41 to 136.492                                                                  | 4.318 to 40                                                                      |
| Index ranges                                | -38 ≤ h ≤ 38, -37 ≤ k ≤ 37, -18 ≤ l ≤ 19                                         | -16 ≤ h ≤ 13, -50 ≤ k ≤ 50, -24 ≤ l ≤ 27                                         | -27 ≤ h ≤ 27, -46 ≤ k ≤ 50, -16 ≤ l ≤ 16                                         | -15 ≤ h ≤ 16, -18 ≤ k ≤ 18, -16 ≤ l ≤ 19                                         |
| Reflections collected                       | 102073                                                                           | 87570                                                                            | 66435                                                                            | 22942                                                                            |
| Independent reflections                     | 15264 [R <sub>int</sub> = 0.0504, R <sub>sigma</sub> = 0.0305]                   | 23828 [R <sub>int</sub> = 0.0899, R <sub>sigma</sub> = 0.1157]                   | 11944 [R <sub>int</sub> = 0.0569, R <sub>sigma</sub> = 0.0597]                   | 10964 [R <sub>int</sub> = 0.0441, R <sub>sigma</sub> = 0.0792]                   |
| Data/restraints/parameters                  | 15264/136/800                                                                    | 23828/1597/1530                                                                  | 11944/328/756                                                                    | 10964/975/1283                                                                   |
| Goodness-of-fit on F <sup>2</sup>           | 1.024                                                                            | 1.080                                                                            | 1.029                                                                            | 1.045                                                                            |
| Final R indexes [I ≥ 2σ (I)]                | R <sub>1</sub> = 0.0616, wR <sub>2</sub> = 0.1833                                | R <sub>1</sub> = 0.1124, wR <sub>2</sub> = 0.2949                                | R <sub>1</sub> = 0.0992, wR <sub>2</sub> = 0.2673                                | R <sub>1</sub> = 0.1238, wR <sub>2</sub> = 0.3054                                |
| Final R indexes [all data]                  | R <sub>1</sub> = 0.0690, wR <sub>2</sub> = 0.1893                                | R <sub>1</sub> = 0.1896, wR <sub>2</sub> = 0.3365                                | R <sub>1</sub> = 0.1173, wR <sub>2</sub> = 0.2841                                | R <sub>1</sub> = 0.1664, wR <sub>2</sub> = 0.3325                                |
| Largest diff. peak/hole / e Å <sup>-3</sup> | 0.65/-0.60                                                                       | 0.77/-0.57                                                                       | 0.64/-0.39                                                                       | 1.27/-0.79                                                                       |

**Table S5.** Crystal data and structure refinement for **mtl-2D-P6MOCN**,  $I_2C$  **mtl-2D-P6MOCN**, **R-bl-2D-P6MOCN** and **S-bl-2D-P6MOCN**.

| Name                                           | <b>mtl-2D-P6MOCN</b>                                           | $I_2C$ <b>mtl-2D-P6MOCN</b>                                    | <b>R-bl-2D-P6MOCN</b>                                          | <b>S-bl-2D-P6MOCN</b>                                          |
|------------------------------------------------|----------------------------------------------------------------|----------------------------------------------------------------|----------------------------------------------------------------|----------------------------------------------------------------|
| Identification code                            | 2326175                                                        | 2326165                                                        | 2326166                                                        | 2326167                                                        |
| Empirical formula                              | $C_{110}H_{120.5}Cu_2N_4O_{22.25}$                             | $C_{114}H_{136}Cu_2I_4N_8O_{18}$                               | $C_{112}H_{114}Cu_2N_6O_{18}$                                  | $C_{112}H_{122}Cu_2N_6O_{22}$                                  |
| Formula weight                                 | 1981.68                                                        | 2540.98                                                        | 1959.17                                                        | 2031.23                                                        |
| Temperature/K                                  | 193.00                                                         | 193.00                                                         | 193.00                                                         | 193.00                                                         |
| Crystal system                                 | orthorhombic                                                   | orthorhombic                                                   | orthorhombic                                                   | orthorhombic                                                   |
| Space group                                    | Pnnn                                                           | Pnnn                                                           | P2 <sub>1</sub> 2 <sub>1</sub> 2                               | P2 <sub>1</sub> 2 <sub>1</sub> 2                               |
| a/Å                                            | 13.8537(8)                                                     | 13.7025(3)                                                     | 19.721(5)                                                      | 19.800(3)                                                      |
| b/Å                                            | 22.6927(15)                                                    | 22.6702(5)                                                     | 21.191(5)                                                      | 21.138(4)                                                      |
| c/Å                                            | 41.561(3)                                                      | 41.6085(10)                                                    | 13.551(3)                                                      | 13.471(3)                                                      |
| $\alpha/^\circ$                                | 90                                                             | 90                                                             | 90                                                             | 90                                                             |
| $\beta/^\circ$                                 | 90                                                             | 90                                                             | 90                                                             | 90                                                             |
| $\gamma/^\circ$                                | 90                                                             | 90                                                             | 90                                                             | 90                                                             |
| Volume/Å <sup>3</sup>                          | 13066.0(14)                                                    | 12925.2(5)                                                     | 5663(2)                                                        | 5638.1(17)                                                     |
| Z                                              | 4                                                              | 4                                                              | 2                                                              | 2                                                              |
| $\rho_{calc}/cm^3$                             | 1.007                                                          | 1.136                                                          | 1.149                                                          | 1.196                                                          |
| $\mu/mm^{-1}$                                  | 2.058                                                          | 8.385                                                          | 0.439                                                          | 0.445                                                          |
| F(000)                                         | 4178                                                           | 5160.0                                                         | 2060.0                                                         | 2140.0                                                         |
| Crystal size/mm <sup>3</sup>                   | 0.13 × 0.12 × 0.1                                              | 0.12 × 0.1 × 0.09                                              | 0.14 × 0.11 × 0.09                                             | 0.13 × 0.1 × 0.09                                              |
| Radiation                                      | GaK $\alpha$ ( $\lambda = 1.34139$ )                           | CuK $\alpha$ ( $\lambda = 1.54178$ )                           | MoK $\alpha$ ( $\lambda = 0.71073$ )                           | MoK $\alpha$ ( $\lambda = 0.71073$ )                           |
| 2 $\Theta$ range for data collection/ $^\circ$ | 5.85 to 107.796                                                | 4.438 to 137.088                                               | 3.844 to 50.696                                                | 4.368 to 50.698                                                |
| Index ranges                                   | -16 ≤ h ≤ 15, -26 ≤ k ≤ 27, -50 ≤ l ≤ 46                       | -16 ≤ h ≤ 13, -27 ≤ k ≤ 26, -50 ≤ l ≤ 46                       | -23 ≤ h ≤ 23, -25 ≤ k ≤ 25, -16 ≤ l ≤ 16                       | -21 ≤ h ≤ 23, -25 ≤ k ≤ 25, -16 ≤ l ≤ 16                       |
| Reflections collected                          | 96701                                                          | 88773                                                          | 65274                                                          | 69588                                                          |
| Independent reflections                        | 11951 [R <sub>int</sub> = 0.0836, R <sub>sigma</sub> = 0.0677] | 11909 [R <sub>int</sub> = 0.1172, R <sub>sigma</sub> = 0.0900] | 10366 [R <sub>int</sub> = 0.1624, R <sub>sigma</sub> = 0.1199] | 10335 [R <sub>int</sub> = 0.1009, R <sub>sigma</sub> = 0.0737] |
| Data/restraints/parameters                     | 11951/223/728                                                  | 11909/274/690                                                  | 10366/160/625                                                  | 10335/547/636                                                  |
| Goodness-of-fit on F <sup>2</sup>              | 0.974                                                          | 1.137                                                          | 0.965                                                          | 1.002                                                          |
| Final R indexes [I >= 2 $\sigma$ (I)]          | R <sub>1</sub> = 0.1380, wR <sub>2</sub> = 0.3019              | R <sub>1</sub> = 0.1319, wR <sub>2</sub> = 0.3146              | R <sub>1</sub> = 0.0886, wR <sub>2</sub> = 0.2338              | R <sub>1</sub> = 0.0874, wR <sub>2</sub> = 0.2426              |
| Final R indexes [all data]                     | R <sub>1</sub> = 0.2090, wR <sub>2</sub> = 0.3428              | R <sub>1</sub> = 0.1716, wR <sub>2</sub> = 0.3384              | R <sub>1</sub> = 0.1475, wR <sub>2</sub> = 0.2811              | R <sub>1</sub> = 0.1204, wR <sub>2</sub> = 0.2803              |
| Largest diff. peak/hole / e Å <sup>-3</sup>    | 1.48/-1.22                                                     | 1.29/-0.72                                                     | 0.36/-0.42                                                     | 0.48/-0.39                                                     |



# $^1\text{H}$ NMR and $^{13}\text{C}$ NMR spectrum

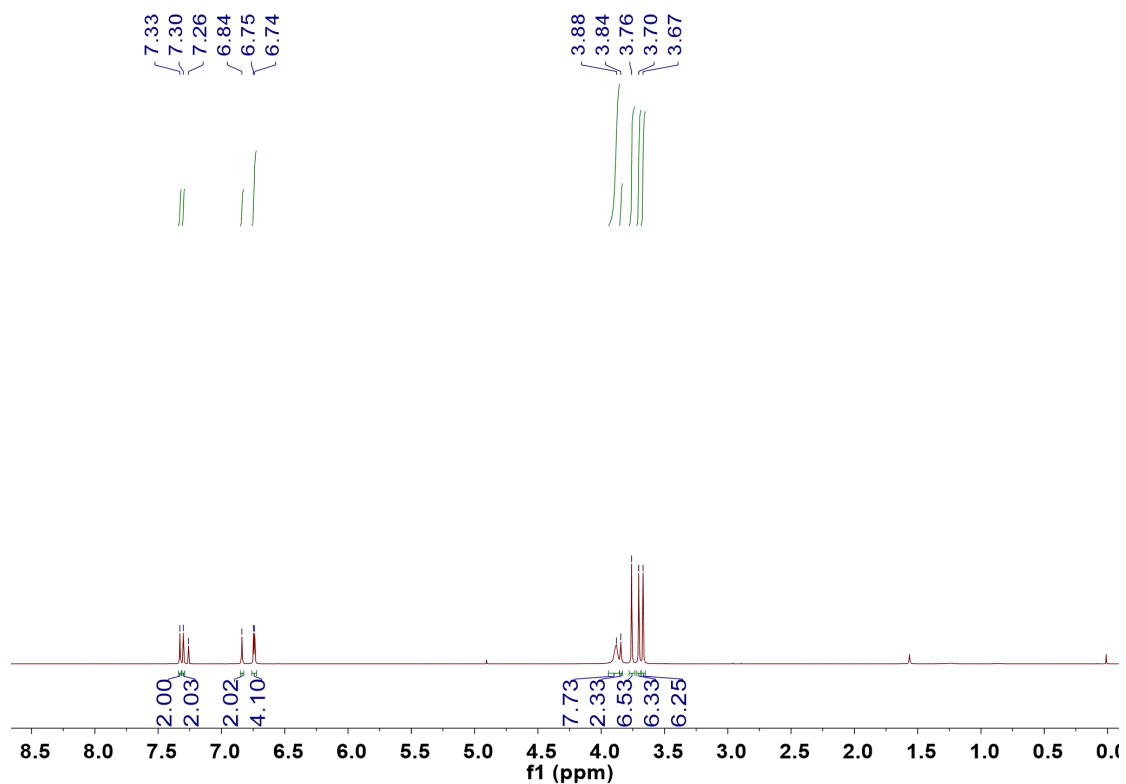

**Figure S71.**  $^1\text{H}$  NMR spectrum (400 MHz) of compound **3** in  $\text{CDCl}_3$ .

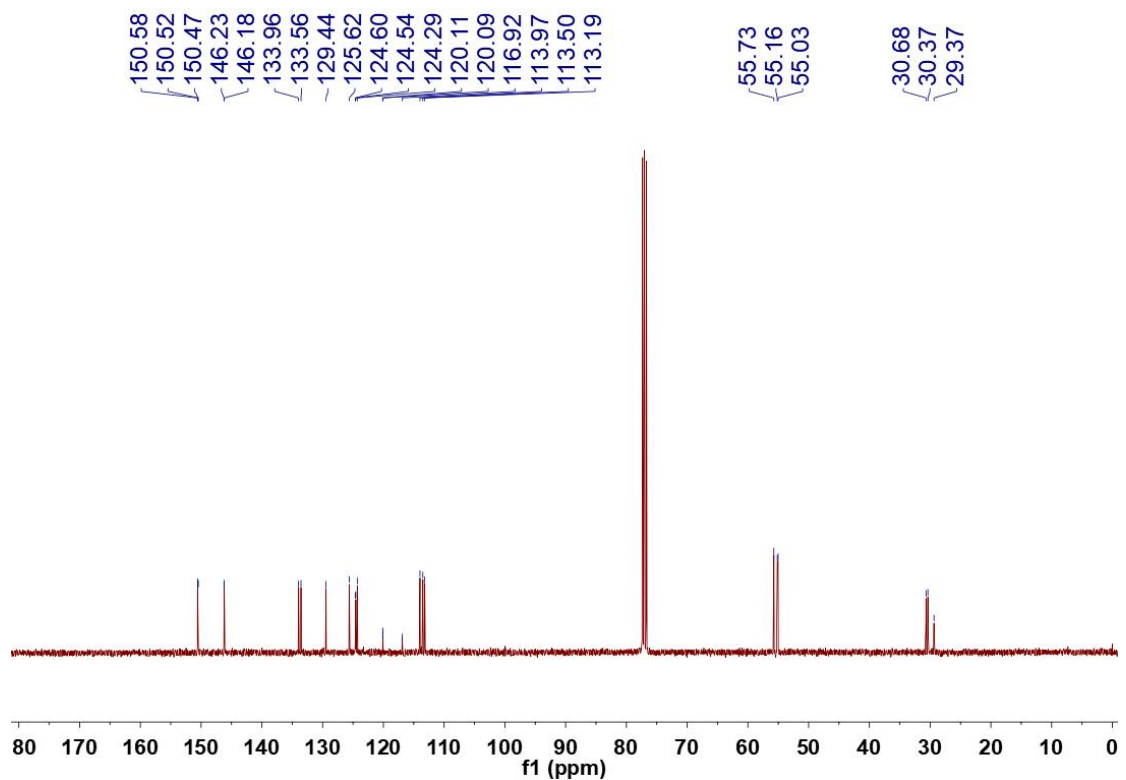

**Figure S72.**  $^{13}\text{C}$  NMR spectrum (100 MHz) of compound **3** in  $\text{CDCl}_3$ .

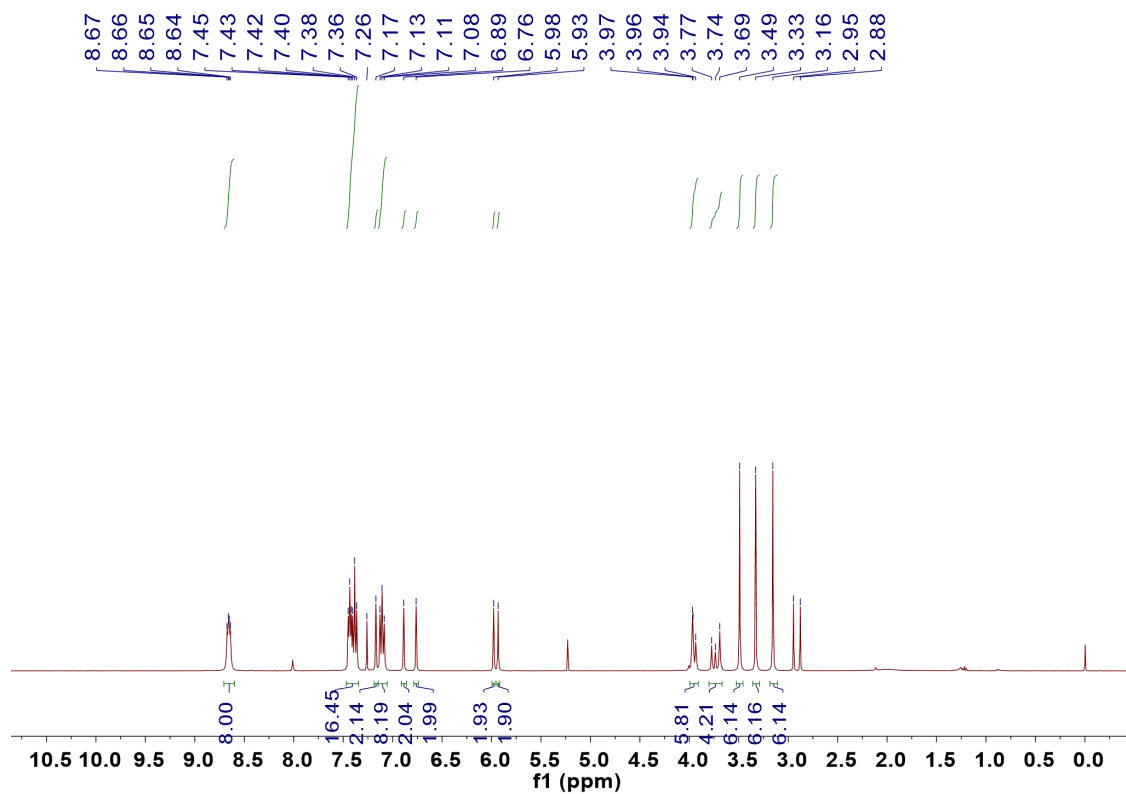

Figure S73.  $^1\text{H}$  NMR spectrum (400 MHz) of compound **P5PhPy4** in  $\text{CDCl}_3$ .

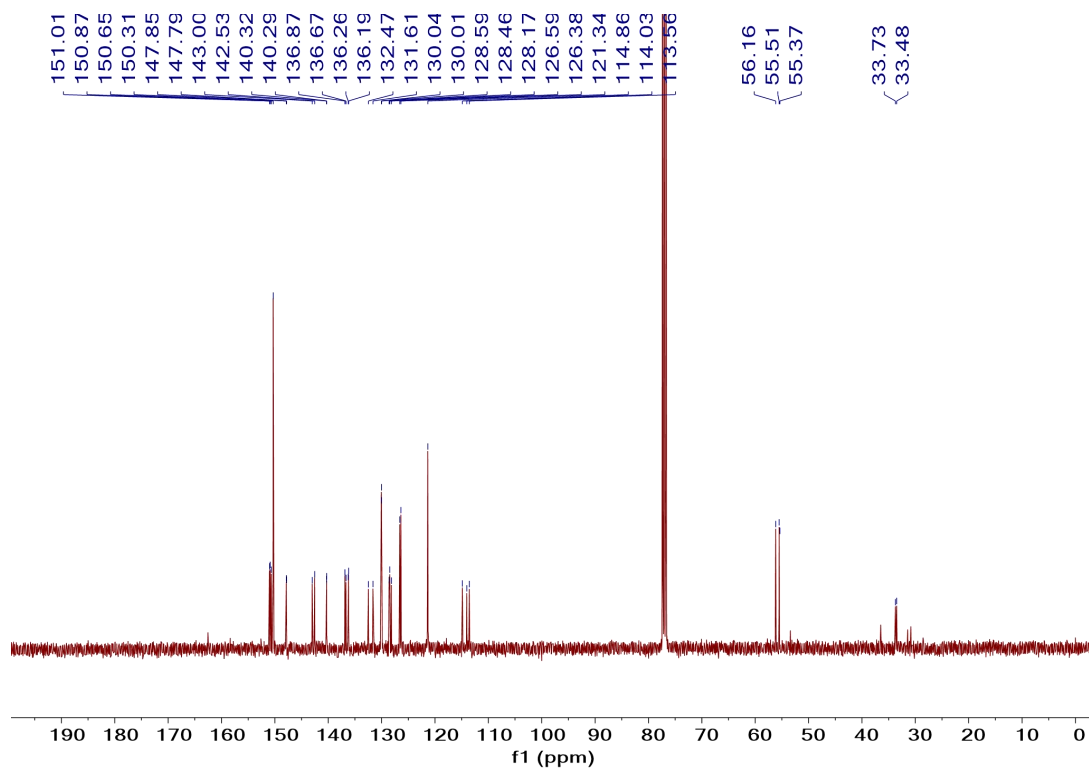

Figure S74.  $^{13}\text{C}$  NMR spectrum (100 MHz) of compound **P5PhPy4** in  $\text{CDCl}_3$ .

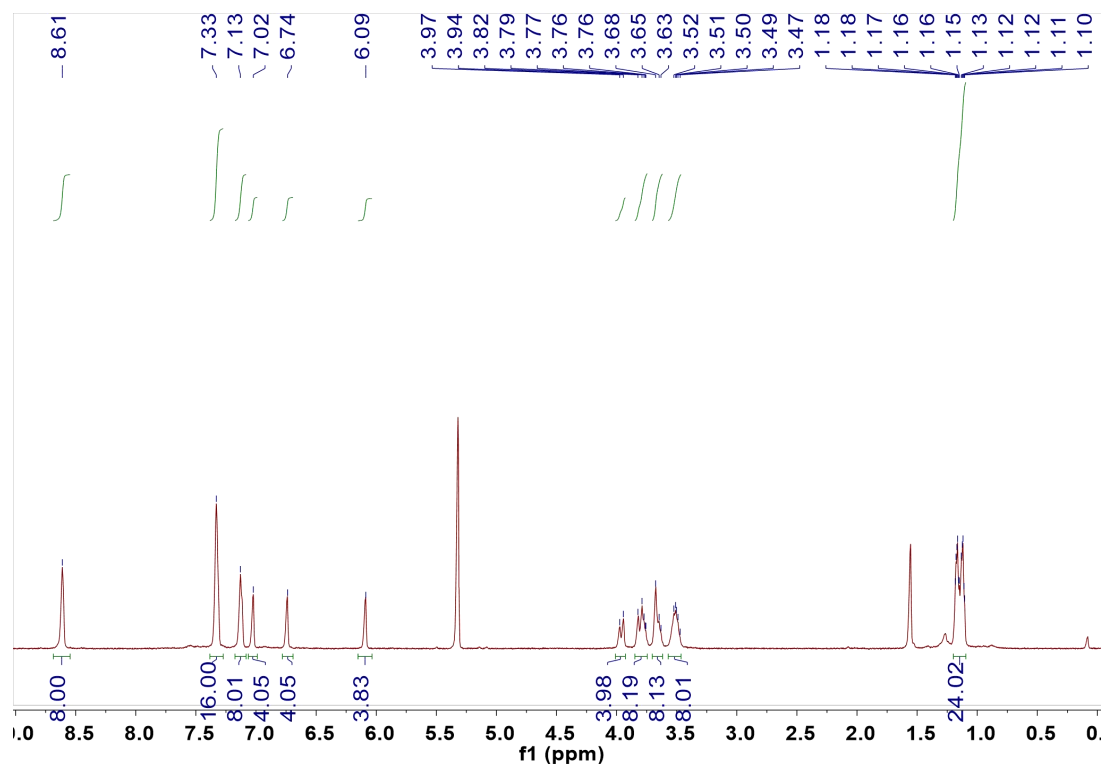

Figure S75. <sup>1</sup>H NMR spectrum (500 MHz) of compound **P6PhPy4** in CD<sub>2</sub>Cl<sub>2</sub>.

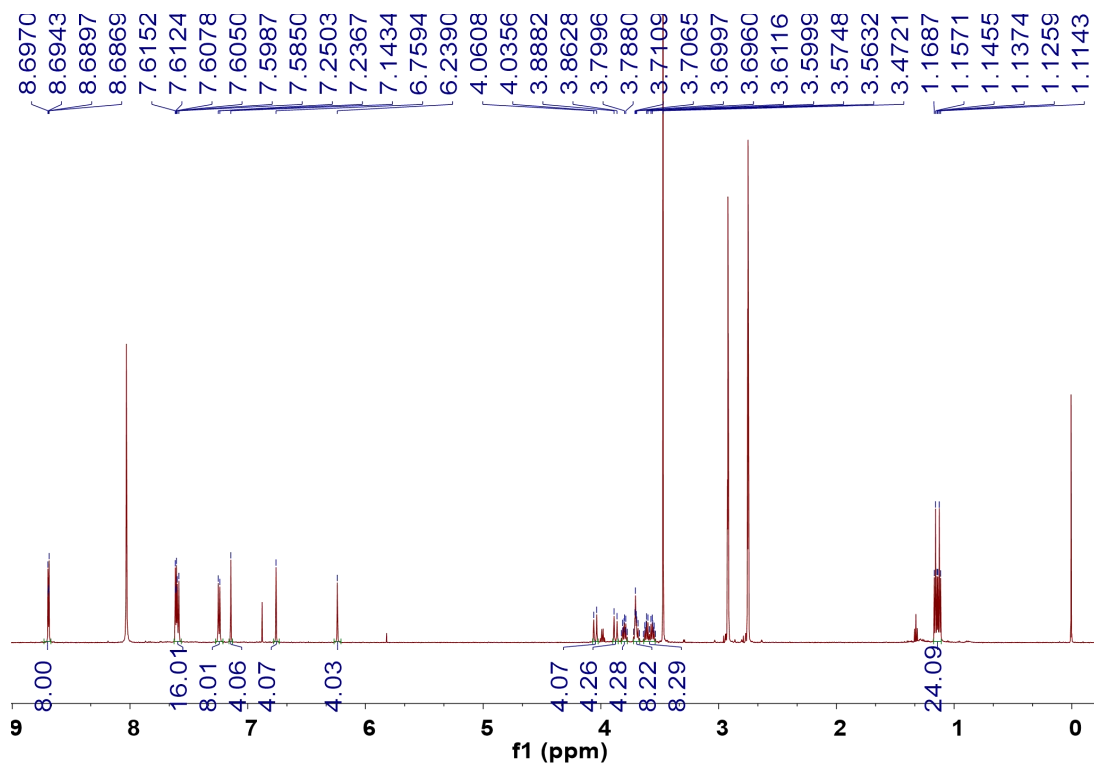

Figure S76. <sup>1</sup>H NMR spectrum (600 MHz) of compound **P6PhPy4** in DMF-D<sub>7</sub>.

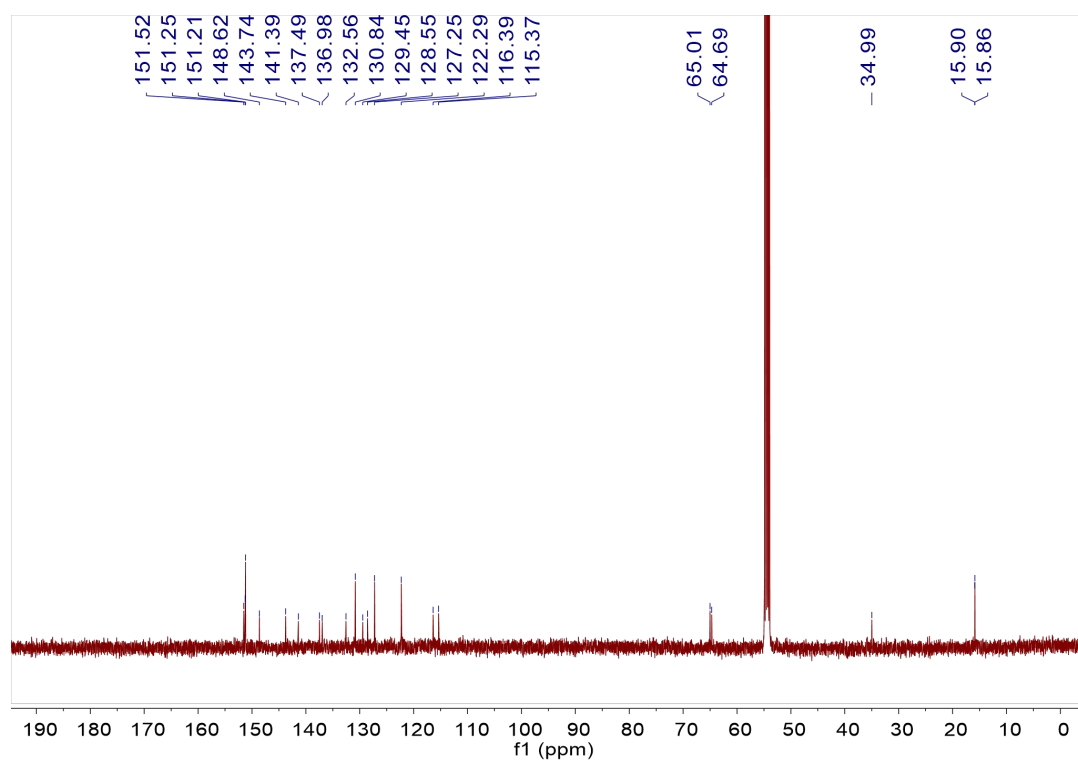

**Figure S77.**  $^{13}\text{C}$  NMR spectrum (126 MHz) of compound **P6PhPy4** in  $\text{CD}_2\text{Cl}_2$ .

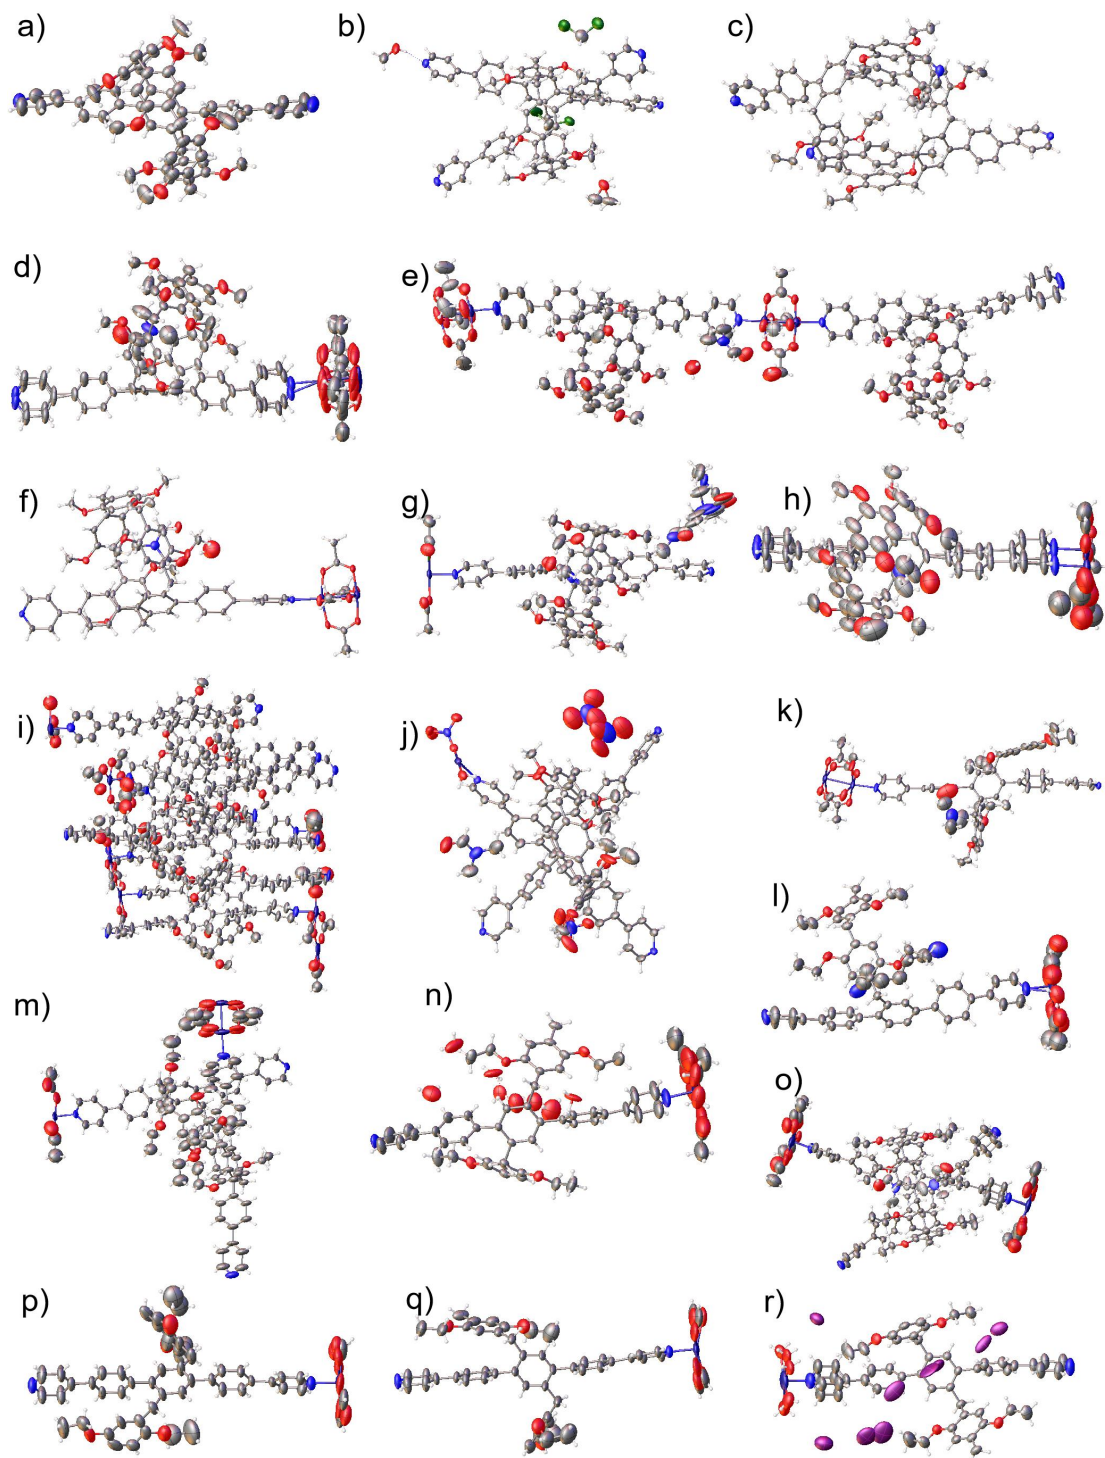

**Figure S78.** ADPs of **P5PhPy2(a)**, **P5PhPy4(b)**, **P6PhPy4(c)**, **P5PhPy2Cu-1(d)**, **P5PhPy2Cu-2(e)**, **P5PhPy2Cu-3(f)**, **P5PhPy2Cu-4(g)**, **P5PhPy2Co-1(h)**, **ml-2D-P5MOCN(i)**, **bl-2D-P5MOCN(j)**, **bl-2D-P6MOCN(k)**, **sbl-2D-P6MOCN(1)(l)**, **fl-2D-P6MOCN(m)**, **mtl-2D-P6MOCN(n)**, **sbl-2D-P6MOCN(2)(o)**, **R-bl-2D-P6MOCN(p)**, **S-bl-2D-P6MOCN(q)** and **I2@mtl-2D-P6MOCN(r)**.



## Reference

1. T. Ogoshi, T. Aoki, K. Kitajima, S. Fujinami, T. A. Yamagishi, Nakamoto, Y. *J. Org. Chem.* 2011, **76**, 328-331.
2. M. Pan, M. Xue, *Eur. J. Org. Chem.* 2013, 4787-4793.
3. X. Y. Lou, N. Song, Y. W. Yang, *Natl. Sci. Rev.* 2021, **8**, nwaa281.
4. H. Zhu, Q. Li, B. Shi, H. Xing, Y. Sun, S. Lu, L. Shangguan, X. Li, F. Huang, P. J. Stang, *J. Am. Chem. Soc.* 2020, **142**, 17340-17345.
5. H. Zeng, P. Liu, H. Xing, F. Huang, *Angew. Chem. Int. Ed.* 2022, **61**, e202115823.
